# Supplementary material
Source: PubMed Central journal article supplement (PMC2846192)

## Supporting Information

# Liposomal Circular Dichroism. Assignment of Remote Stereocenters in Plakinic Acids K and L from a *Plakortis-Xestospongia* Sponge Association

Doralyn S. Dalisay<sup>§</sup>, Tim Quach<sup>§</sup> and Tadeusz F. Molinski<sup>§,†,\*</sup>

<sup>§</sup>Department of Chemistry and Biochemistry, and <sup>†</sup>Skaggs School of Pharmacy and Pharmaceutical Sciences, University of California, San Diego, 9500 Gilman Drive, La Jolla, California 92093.

[tmolinski@ucsd.edu](mailto:tmolinski@ucsd.edu)

| <i>Content</i>                                                                                                | <i>Page</i> |
|---------------------------------------------------------------------------------------------------------------|-------------|
| General procedures .....                                                                                      | S2          |
| Purification and characterization of plakinic acids K ( <b>3</b> ) and L ( <b>4</b> ) .....                   | S3          |
| Table S1: <sup>1</sup> H and <sup>13</sup> C NMR data of plakinic acid K ( <b>3</b> ) .....                   | S4          |
| Table S2: <sup>1</sup> H and <sup>13</sup> C NMR data of plakinic acid L ( <b>4</b> ) .....                   | S5          |
| Table S3: <sup>1</sup> H and <sup>13</sup> C NMR data of plakinic acid M ( <b>S1</b> ) .....                  | S6          |
| Degradation of plakinic acids K ( <b>3</b> ) and L ( <b>4</b> ) to <b>7</b> .....                             | S7-S8       |
| Liposomal CD (L-CD) measurements .....                                                                        | S8          |
| Figure S1. L-CD spectra of <b>7</b> , <b>8</b> and <b>9</b> and <i>ent-9</i> (calculated).....                | S9          |
| Figure S2. Time-dependence of Cotton effect in L-CD spectrum of <b>7</b> .....                                | S10         |
| Table S4. Tabulated Cotton effects in L-CD spectra of <b>7</b> , <b>8</b> and <b>9</b> .....                  | S10         |
| Synthetic procedures .....                                                                                    | S11-S16     |
| Figures S3-S15: <sup>1</sup> H, <sup>13</sup> C and 2D NMR spectra of <b>3</b> , <b>4</b> and <b>S1</b> ..... | S17-S29     |
| Figures S16-S43: <sup>1</sup> H and <sup>13</sup> C NMR spectra of <b>8–23</b> .....                          | S30-S57     |

**General Procedures:** All non-aqueous reactions were carried out in oven-dried glassware under a nitrogen atmosphere, unless otherwise noted. All solvents were reagent grade. Solvents for dry reactions (DCM, DMF, THF, toluene, acetonitrile, Et<sub>2</sub>O) were passed through twin alumina columns (J. C. Meyer, Glass Contour). DMSO was distilled from calcium hydride under reduced pressure and stored over 4 Å molecular sieves. Dry MeOH was prepared and stored over 4 Å molecular sieves. Triethylamine and pyridine were distilled from calcium hydride. All other commercially available reagents were used as received. Reactions were monitored by thin layer chromatography (TLC) using 0.25-mm E. Merck per-coated silica gel plates.

CD spectra were recorded on a Jasco J810 spectropolarimeter in 0.2 cm quartz cells at 23 °C unless otherwise stated. UV-Vis spectra were recorded in a dual beam Jasco V630 spectrometer in 1 cm quartz cells. Intensities of CD spectra in DSPC liposomes were normalized to absorbance (MeOH).

Routine <sup>1</sup>H and <sup>13</sup>C NMR spectra were recorded in CDCl<sub>3</sub> using either a Varian Mercury-400 (400 MHz and 75 MHz), Varian Unity-500 (500 MHz), JEOL ECA 500 (500 MHz and 125 MHz), or Bruker DMX-600 (600 MHz) equipped with a 1.7 mm {<sup>13</sup>C}<sup>1</sup>H TXI probe. NMR spectra were referenced to solvent signals (<sup>1</sup>H, residual CHCl<sub>3</sub> at δ 7.26 ppm; <sup>13</sup>C, δ 77.16 ppm). HRMS measurements were carried out at the University of California, Riverside (ESI-MS), or University of California, San Diego (EI-MS) mass spectrometry facilities. Optical rotations were measured on a Jasco P-1010 or P-2000 model digital polarimeter in cells of 10 mm pathlength (*c*, g/100 mL). IR spectra were recorded on a Jasco 4100 FTIR using ATR (ZnSe plate). LCMS was carried out on a ThermoFisher Accela LC coupled to an MSQ single quadrupole mass spectrometer in positive ion mode, unless otherwise stated. Semi-preparative HPLC was carried out on a Varian SD200 system equipped with a dual-pump and UV-1 UV detector under specified conditions.

## Purification and Characterization of Plakinic acids K (3) and L (4).

The sponge *Plakortis halichondroides*–*Xestospongia deweerdtiae* Lehnert & van Soest, 1999 was collected from reef habitat in the Bahamas (lat. 24° 25.163', long. 75° 58.435', accession number, 07-26-171) at a depth of –27 m during the June 2007 cruise of the *RV Seward Johnson*, and frozen immediately until used. The sponge was identified by Sven Zea (Universidad Nacional de Colombia).

**Extraction and Isolation.** A frozen sample of the sponge *P. halichondroides*–*X. deweerdtiae* (07-26-171; 200 g) was extracted with MeOH:CH<sub>2</sub>Cl<sub>2</sub> with stirring overnight at rt. (100 mL x 2), the combined extracts were filtered and concentrated under reduced pressure. The methanol extract was fractionated using sequential solvent-solvent partitioning with adjustment of the H<sub>2</sub>O content at each step: 0% v/v H<sub>2</sub>O, hexane (100 mL, Fraction A), 40% v/v H<sub>2</sub>O, CHCl<sub>3</sub> (100 mL x 2, Fraction B). The MeOH was removed under reduced pressure and the aqueous residue extracted with *n*-BuOH (100 mL x 2, Fraction D). Fraction B (1.41 g) was subjected to silica flash chromatography (2 x 12.5 cm, 0 to 100% MeOH, stepwise 20% increment in CHCl<sub>3</sub>) to yield fractions #1-8. Fraction #2 (320 mg) was further purified by silica gel flash chromatography (Analogix, RS-4 cartridge, 4g, 50 μm 60Å) using mixtures of hexane and ethyl acetate of increasing polarity (0-100%). Fractions were pooled according to their TLC profiles. The early-eluting Fraction 1 (153 mg) was purified by reversed phase HPLC (C<sub>18</sub> Luna Phenomenex, 250 x 10 mm) under gradient conditions (70:30 CH<sub>3</sub>CN:H<sub>2</sub>O to 100% CH<sub>3</sub>CN, 3 mL/min, UV detection λ = 254 nm) to give pure plakinic acid K (**3**, 31 mg, 0.0155 % wet weight), plakinic acid L (**4**, 28 mg, 0.014%) and plakinic acid M (**S1**, 41 mg, 0.0205 % wet weight).

**Plakinic acid K (3)** colorless oil.  $[\alpha]_D^{24} -113$  (c 3.39, CHCl<sub>3</sub>), UV (MeOH) λ<sub>max</sub> 260 nm (ε 285), 268 (203), FTIR (ATR, neat) ν 2921, 2850, 1710, 1371, 1294, 738, 697 cm<sup>-1</sup>. <sup>1</sup>H and <sup>13</sup>C NMR data (see Table S1). HREIMS *m/z* 418.3081 [M]<sup>+</sup>, calcd. 418.3083 for C<sub>26</sub>H<sub>42</sub>O<sub>4</sub>.

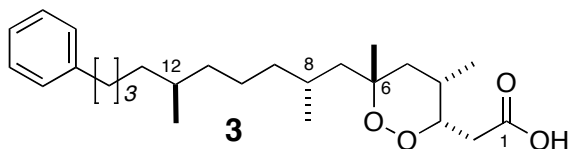

**Plakinic acid L (4)**. colorless oil;  $[\alpha]_D^{24} -26.2$  (c 1.90, CHCl<sub>3</sub>); UV (MeOH) λ<sub>max</sub> 268 nm (ε 155), 261 (225); FTIR (ATR, neat) ν 2926, 2850, 1710, 1456, 1381, 1305, 1213, 743, 697 cm<sup>-1</sup>; <sup>1</sup>H and <sup>13</sup>C NMR (see Table S2). HREIMS *m/z* 404.2918 [M]<sup>+</sup>, calcd. 404.2927 for C<sub>25</sub>H<sub>40</sub>O<sub>4</sub>.

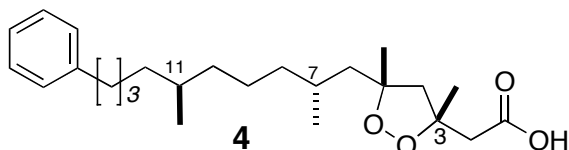

**Plakinic acid M (S1)**. colorless oil;  $[\alpha]_D^{24} -137$  (c 1.31, CHCl<sub>3</sub>); UV (MeOH) λ<sub>max</sub> 269 nm (ε 162), 261 (234); FTIR (ATR, neat) ν 2920, 2850, 1715, 1456, 1371, 1290, 1026, 743, 697 cm<sup>-1</sup>; <sup>1</sup>H and <sup>13</sup>C NMR (see Table S3). HREIMS *m/z* = 418.3081 [M]<sup>+</sup> calcd. 418.3083 for C<sub>26</sub>H<sub>42</sub>O<sub>4</sub>.

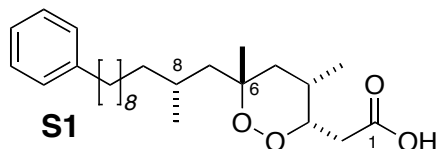

**Table S1.**  $^1\text{H}$  (600 MHz) and  $^{13}\text{C}$  NMR (100 MHz) for plakinic acid K (**3**) ( $\text{CDCl}_3$ )

| No. | $^1\text{H}$ , $\delta$ , mult. ( $J$ in Hz) | $^{13}\text{C}$ , $\delta$ , mult. | HMBC, $^1\text{H} \rightarrow ^{13}\text{C}$ |
|-----|----------------------------------------------|------------------------------------|----------------------------------------------|
| 1   |                                              | 177.6, C                           |                                              |
| 2   | 2.49, dd (16.0, 4.0)<br>2.99, dd (16.0, 9.0) | 31.7, $\text{CH}_2$                | 1, 3, 4<br>1, 3, 4                           |
| 3   | 4.43, ddd (9.0, 5.0, 4.0)                    | 79.4, CH                           | 1, 2, 4, 5                                   |
| 4   | 2.45, m                                      | 27.9, CH                           | 1, 2, 3, 5, 21                               |
| 5   | 1.41, m<br>1.30, m                           | 37.2, $\text{CH}_2$                | 3, 4, 6, 7, 21, 22                           |
| 6   |                                              | 81.4, C                            |                                              |
| 7   | 1.43, m<br>1.26, m                           | 48.4, $\text{CH}_2$                | 5, 6, 8, 9, 22<br>5, 6, 8, 9, 22             |
| 8   | 1.62, m                                      | 28.4, CH                           |                                              |
| 9   | 1.07, m<br>1.28, m                           | 39.0, $\text{CH}_2$                | 7, 8, 10, 11<br>7, 8, 10, 11                 |
| 10  | 1.16, m<br>1.30, m                           | 24.5, $\text{CH}_2$                | 7, 8, 9, 11                                  |
| 11  | 1.04, m<br>1.24, m                           | 37.3, $\text{CH}_2$                | 9, 12, 24<br>9, 12                           |
| 12  | 1.35, m                                      | 32.8, CH                           | 14, 24                                       |
| 13  | 1.11, m                                      | 36.9, $\text{CH}_2$                | 11, 12, 14, 24                               |
| 14  | 1.32, m                                      | 26.9, $\text{CH}_2$                | 12, 13, 24                                   |
| 15  | 1.60, m                                      | 31.9, $\text{CH}_2$                | 14, 16, 17                                   |
| 16  | 2.60, t (7.6)                                | 36.1, $\text{CH}_2$                | 14, 15, 17, 18                               |
| 17  |                                              |                                    |                                              |
| 18  | 7.18, m                                      | 128.3, CH                          | 16, 19, 20                                   |
| 19  | 7.27, t (8.0)                                | 128.5, CH                          | 17, 18                                       |
| 20  | 7.16, m                                      | 125.6, CH                          | 17, 19                                       |
| 21  | 0.87, d (6.9)                                | 17.3, $\text{CH}_3$                | 3, 4, 5                                      |
| 22  | 1.38, s                                      | 21.7, $\text{CH}_3$                | 5, 6, 7                                      |
| 23  | 0.92, d (6.6)                                | 22.1, $\text{CH}_3$                | 7, 8, 9                                      |
| 24  | 0.83, d (6.6)                                | 19.8, $\text{CH}_3$                | 12, 13                                       |

**Table S2.**  $^1\text{H}$  (600 MHz) and  $^{13}\text{C}$  NMR (100 MHz) for plakinic acid L (**4**) ( $\text{CDCl}_3$ )

| No. | $^1\text{H}$ , $\delta$ , mult. ( $J$ in Hz) | $^{13}\text{C}$ , $\delta$ , mult. <sup>a</sup> | HMBC, $^1\text{H} \rightarrow ^{13}\text{C}$ |
|-----|----------------------------------------------|-------------------------------------------------|----------------------------------------------|
| 1   |                                              | 176.2, C                                        |                                              |
| 2   | 2.72, d (15.2)<br>2.82, d (15.2)             | 44.7, $\text{CH}_2$                             | 1, 3, 4<br>1, 3, 4                           |
| 3   |                                              | 83.8, CH                                        | 1, 2, 4, 5                                   |
| 4   | 2.19, d (12.8)<br>2.59, d (12.8)             | 56.8, CH                                        | 2, 3, 5, 20, 21<br>2, 3, 5, 20, 21           |
| 5   |                                              | 87.4, $\text{CH}_2$                             |                                              |
| 6   | 1.38, dd (7.6, 14.0)<br>1.67, dd (4.9, 14.0) | 45.6, C                                         | 4, 5, 7, 8, 21, 22<br>4, 5, 7, 8, 21, 22     |
| 7   | 1.58, m                                      | 29.7, $\text{CH}_2$                             | 4, 6                                         |
| 8   | 1.12, m<br>1.31, m                           | 38.5, CH                                        | 6, 7, 11, 12                                 |
| 9   | 1.18, m                                      | 24.7, $\text{CH}_2$                             | 7, 8, 10, 11                                 |
| 10  | 1.12, m<br>1.31, m                           | 37.1, $\text{CH}_2$                             | 7, 9, 11, 12, 13, 22, 23                     |
| 11  | 1.38, m                                      | 32.9, $\text{CH}_2$                             | 8, 7, 10                                     |
| 12  | 1.05, m<br>1.25, m                           | 37.4, CH                                        | 8, 9, 10, 11, 23                             |
| 13  | 1.32, m                                      | 27.0, $\text{CH}_2$                             | 9, 11, 23                                    |
| 14  | 1.60, m                                      | 32.0, $\text{CH}_2$                             | 15                                           |
| 15  | 2.60, t (7.6)                                | 36.2, $\text{CH}_2$                             | 14, 16, 17                                   |
| 16  |                                              | 143.0, $\text{CH}_2$                            |                                              |
| 17  | 7.17, m                                      | 128.5, CH                                       |                                              |
| 18  | 7.27, t (8.0)                                | 128.3, CH                                       |                                              |
| 19  | 7.16, m                                      | 128.5, CH                                       |                                              |
| 20  | 1.48, s                                      | 23.8, CH                                        | 2, 3, 4                                      |
| 21  | 1.35, s                                      | 25.1, $\text{CH}_3$                             | 4, 5, 6                                      |
| 22  | 0.89, d (6.6)                                | 21.1, $\text{CH}_3$                             | 6, 7, 8                                      |
| 23  | 0.83, d (6.6)                                | 19.9, $\text{CH}_3$                             | 11,                                          |

<sup>a</sup> Determined from DEPT and HSQC.

**Table S3.**  $^1\text{H}$  (600 MHz) and  $^{13}\text{C}$  NMR (100 MHz) for plakinic acid M (**S1**) ( $\text{CDCl}_3$ )

| No. | $^1\text{H}$ (mult. ( $J$ in Hz))            | $^{13}\text{C}$ (mult.) <sup>b</sup> |
|-----|----------------------------------------------|--------------------------------------|
| 1   |                                              | 177.6 (C)                            |
| 2   | 2.49 (dd, 16.0, 9.2)<br>2.99 (dd, 16.0, 4.0) | 31.9 ( $\text{CH}_2$ )               |
| 3   | 4.43 (ddd, 4.6, 5.0, 8.9)                    | 79.6 (CH)                            |
| 4   | 2.45 (m)                                     | 28.1 (CH)                            |
| 5   | 1.40 (m)                                     | 37.6 ( $\text{CH}_2$ )               |
| 6   |                                              | 81.7 (C)                             |
| 7   | 1.44 (m)                                     | 48.7 ( $\text{CH}_2$ )               |
| 8   | 1.60 (m)                                     | 28.6 (CH)                            |
| 9   | 1.29 (m)                                     | 38.9 ( $\text{CH}_2$ )               |
| 10  | 1.50 (m)                                     | 27.3 ( $\text{CH}_2$ )               |
| 11  | 1.29 (br s <sup>a</sup> )                    | 29.8 ( $\text{CH}_2$ ) <sup>a</sup>  |
| 12  | 1.29 (br s <sup>a</sup> )                    | 29.9 ( $\text{CH}_2$ ) <sup>a</sup>  |
| 13  | 1.29 (br s <sup>a</sup> )                    | 30.0 ( $\text{CH}_2$ ) <sup>a</sup>  |
| 14  | 1.29 (br s <sup>a</sup> )                    | 30.0 ( $\text{CH}_2$ ) <sup>a</sup>  |
| 15  | 1.29 (br s <sup>a</sup> )                    | 30.1 ( $\text{CH}_2$ ) <sup>a</sup>  |
| 16  |                                              |                                      |
| 17  |                                              |                                      |
| 18  | 1.60 (m)                                     | 30.3 ( $\text{CH}_2$ )               |
| 19  | 2.60 (t, 8.0)                                | 36.3 ( $\text{CH}_2$ )               |
| 20  | 7.26 (d, 6.4)                                | 128.5 (CH)                           |
| 21  | 7.27 (t, 8.0)                                | 128.7 (CH)                           |
| 22  | 7.18 (d, 7.2)                                | 125.8 (CH)                           |
| 23  | 0.87 (d, 6.8)                                | 17.5 ( $\text{CH}_3$ )               |
| 24  | 1.38 (s)                                     | 22.3 ( $\text{CH}_3$ )               |
| 25  | 0.91 (d, 6.8)                                | 22.0 ( $\text{CH}_3$ )               |

<sup>a</sup> Interchangeable, unresolved methylene envelope. <sup>b</sup> determined from DEPT and HSQC.

## FeCl<sub>2</sub>-Promoted Fragmentation of Plakinic acid K (3) and Plakinic acid L (4).

Commercial AR grade FeCl<sub>2</sub>·4H<sub>2</sub>O (washed with 6 M HCl, dried, to remove Fe(III) impurities) was prepared as a stock solution in degassed distilled H<sub>2</sub>O. A solution of plakinic acid K (3) (15.0 mg, 35.8 μmol) in CH<sub>3</sub>CN/H<sub>2</sub>O (8:2, 1.0 mL, deaerated, N<sub>2</sub> purge, 40 min) was treated with FeCl<sub>2</sub> solution (1.0 M, 102 μL, 102.5 μmol) and stirred under an atmosphere of N<sub>2</sub> for 30 min, then quenched by adding 4 drops of 1.0 M citric acid and was added with 4 volumes of hexane, vortexed for 1 min and centrifuged to separate the organic layer. The aqueous layer was washed twice with hexane. The combined hexane layer was concentrated under reduced pressure and the residue was purified on a short SiO<sub>2</sub> column (pipette) using the following solvent system: 1:10, 2:10 and 3:10 EtOAc:hexanes to obtain colorless oil of 5 (1.0 mg, 6.6%).

Plakinic acid L (4) was treated with FeCl<sub>2</sub>, as described above, to obtain 5 which was converted through the same sequence of reactions, described below. The intermediates were the same (<sup>1</sup>H NMR) and the product 7 (~200 μg) was identical (<sup>1</sup>H NMR, LRESIMS *m/z* 468.30 [M+Na]<sup>+</sup>, HPLC rt, L-CD) to that derived from 3.

### (10-Chloro-5,9-dimethyldecyl)benzene, 5

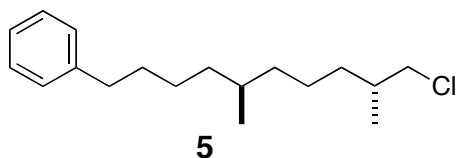

5 from 3. Colorless oil. <sup>1</sup>H NMR (400 MHz, CDCl<sub>3</sub>): δ 7.28 (t, *J* = 8 Hz, 2H), 7.17 (d, *J* = 6.6 Hz, 3H), 3.48 (dd, *J* = 10.8, 4.8 Hz, 1H), 3.40 (dd, *J* = 10.8, 6.0 Hz, 1H), 2.60 (t, *J* = 8 Hz, 2H), 1.80 (m, 1H), 1.60 (m, 2H), 1.40 (m, 2H), 1.30-1.28 (m, 7H), 1.15 (m, 3H), 0.99 (d, *J* = 6.4 Hz, 3H), 0.84 (d, *J* = 6.8 Hz, 3H).

### (10-Azido-5,9-dimethyldecyl)benzene, 6 derived from 3

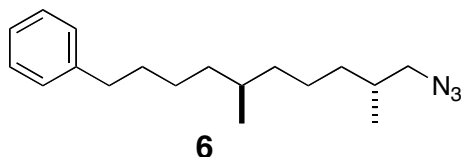

Dried NaN<sub>3</sub> (1.16 mg, 17.0 μmol) was added to 5 (1.0, 3.0 μmol) in 50 μL of DMF. The reaction mixture was stirred vigorously at 100 °C for 4 h. The reaction was stopped and added with 200 μL of H<sub>2</sub>O and extracted with hexanes (3 x 500 μL) to yield 6 (0.6 mg). <sup>1</sup>H NMR (400 MHz, CDCl<sub>3</sub>): δ 7.27 (t, *J* = 8 Hz, 3H), 7.18 (d, *J* = 7.1 Hz, 2H), 3.20 (dd, *J* = 11.8, 5.9 Hz, 1H), 3.09 (dd, *J* = 12.1, 6.8 Hz, 1H), 2.60 (t, *J* = 7.2 Hz, 2H), 1.80 (m, 1H), 1.60 (m, 2H), 1.35-1.25 (m, 7H), 1.15 (m, 3H), 0.94 (d, *J* = 6.7 Hz, 3H), 0.84 (d, *J* = 6.2 Hz, 3H).

### 2,6-dimethyl-10-phenyldecan-1-amine, S2 derived from 3

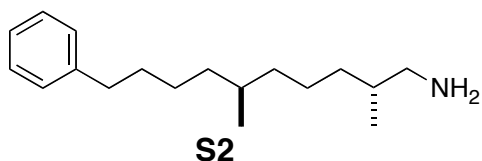

Azide 6 (0.6 mg, 2.0 μmol) was dissolved in 1 mL of EtOH:hexanes (3:1) and added with 0.8 mg of Pd/C (10% wt) and purged with H<sub>2</sub> for 1 h. The Pd/C was removed by syringe filter and the solvent was dried by rotaevaporation to yield S2 (1.0 mg). <sup>1</sup>H NMR (500 MHz, CDCl<sub>3</sub>): δ 7.27 (t, *J* = 8 Hz, 3H), 7.18 (d, *J* = 7.1 Hz, 2H), 2.60 (t, *J* = 8.1 Hz, 2H), 2.45 (dd, 14.2, 5.1 Hz, 1H), 1.60 (m, 2H), 1.41 (m, 1H), 1.30-1.27 (m, 13H), 1.09 (m, 1H), 0.88 (d, *J* = 6.8 Hz, 3H), 0.85 (d, *J* = 8.0 Hz, 3H) LRESIMS *m/z* 262.17 [M+H]<sup>+</sup>.

### *N*-(2,6-dimethyl-10-phenyldecyl)-6-methoxy-2-naphthamide, **7** derived from **3**

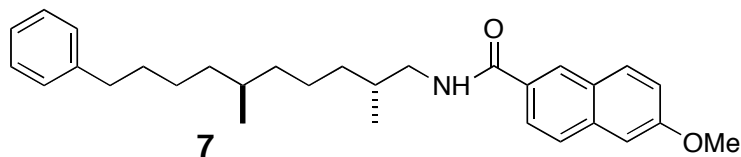

6-Methoxy-2-naphthoyl chloride (2.20 mg, 9  $\mu$ mol) was added to a solution of (**S2** (1.0 mg, 4  $\mu$ mol) in 50  $\mu$ L of  $\text{CH}_2\text{Cl}_2$ . A catalytic amount ( $\sim$  0.1 mg) of DMAP and  $\text{Et}_3\text{N}$  (1.43 mg, 1.4  $\mu$ mol) were added to the

solution and stirred vigorously for 2 h at r.t. then quenched by adding DMAPA (0.40 mg, 4  $\mu$ mol). The reaction mixture was purified by silica column (pencil) using 3:10 EtOAc:hexanes and further purified by RPHPLC (Phenylhexyl analytical column, 250 x 4.6 mm; 90:10 MeOH:H<sub>2</sub>O; 1 ml/min; detector 254 nm) to afford **7** ( $\sim$ 400  $\mu$ g). <sup>1</sup>H NMR (400 MHz,  $\text{CDCl}_3$ ): d 8.20 (s, 1H), 7.81 (m, 3H), 7.29-7.15 (m, 7H), 6.23 (m, 1H), 3.94 (s, 3H), 3.45 (m, 1H), 3.31 (m, 1H), 2.60 (t,  $J$  = 8.0 Hz, 2H), 1.77 (m, 1H), 1.60 (m, 2H), 1.40-1.25 (m, 14H), 0.99 (d,  $J$  = 6.6 Hz, 3H), 0.84 (d,  $J$  = 6.5 Hz, 3H). LRESIMS  $m/z$  468.30  $[\text{M}+\text{Na}]^+$ .

### Preparation of DSPC Liposomes and Liposomal CD (L-CD) Measurements

Liposomal naphthamides were prepared as previously described.<sup>1</sup> Briefly, a solution of 1,2-distearoyl-*sn*-glycero-3-phosphocholine (DSPC, 2 mg/mL in  $\text{CHCl}_3$ ) was added to a solution of naphthamide in  $\text{CHCl}_3$ , concentrated in a round bottom flask. To the dried liposome, 2 mL of HPLC grade H<sub>2</sub>O was added. The resulting suspension was sonicated for 2 min, heated (60 °C) and cooled (r.t.) (repeated twice). Uniform liposomes were prepared from this mixture by repeated extrusion (x25) through a 100 nm polycarbonate membrane secured between two 0.5 mL gas tight syringes (Liposofast, Avestin, Toronto, Canada). CD measurements were carried out on the resulting clear preparations under the following parameters:  $T$  = 23 °C; sensitivity, 100 mdeg; scanning speed, 50 nm/min; wavelength, from 180 to 400 nm;  $N$  = 15 accumulations. The CD spectra were subtracted from the baseline spectra recorded for DSPC liposomes without added naphthamides. Sample concentrations for L-CD were determined from absorbance at  $\lambda$  238 nm in MeOH and  $\epsilon$  values.

(1). (a) MacMillan, J. B.; Molinski, T. F. *J. Am. Chem. Soc.* **2004**, *12*, 9944-5. b) Macmillan, J. B.; Linington, R. G.; Andersen, R. J.; Molinski, T. F. *Angew Chem Int Ed Engl.* **2004**, *43*, 5946-51



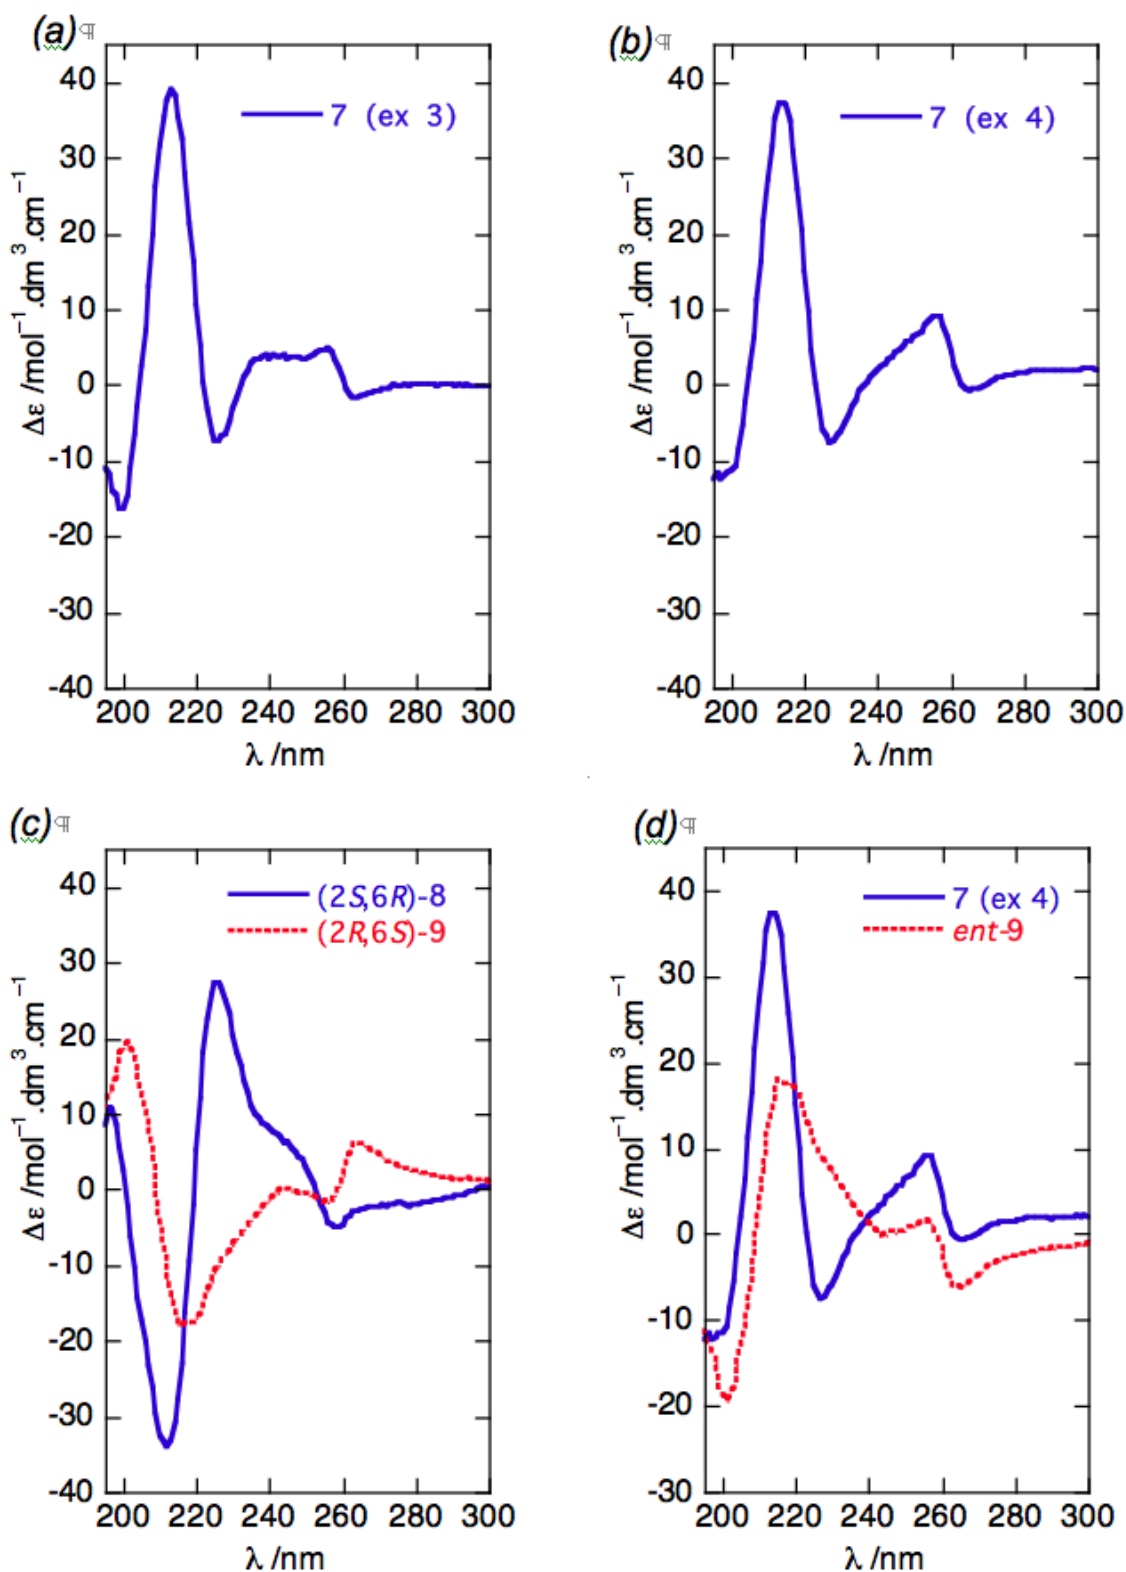

**Figure S1.** Liposomal circular dichroism (L-CD) spectra ( $T = 23\text{ }^{\circ}\text{C}$ ; liposomes,  $\text{H}_2\text{O}$ , diastearoyl-*sn*-3-glycero-phosphocholine, 2 mg/mL; mole ratio of phospholipid:naphthamide = 20:1). (a) **7**, prepared from **3**. (b) **7**, prepared from **4** ( $c = 4.4 \times 10^{-4}\text{ M}$ ). (c) (2*S*,6*R*)-**8** ( $c = 2.25 \times 10^{-4}\text{ M}$ ) and (2*R*,6*S*)-**9** ( $c = 2.47 \times 10^{-4}\text{ M}$ ). (d) **7**, prepared from **4** and calculated L-CD spectrum of (2*S*,6*S*)-**9** (inversion of L-CD of **9**).

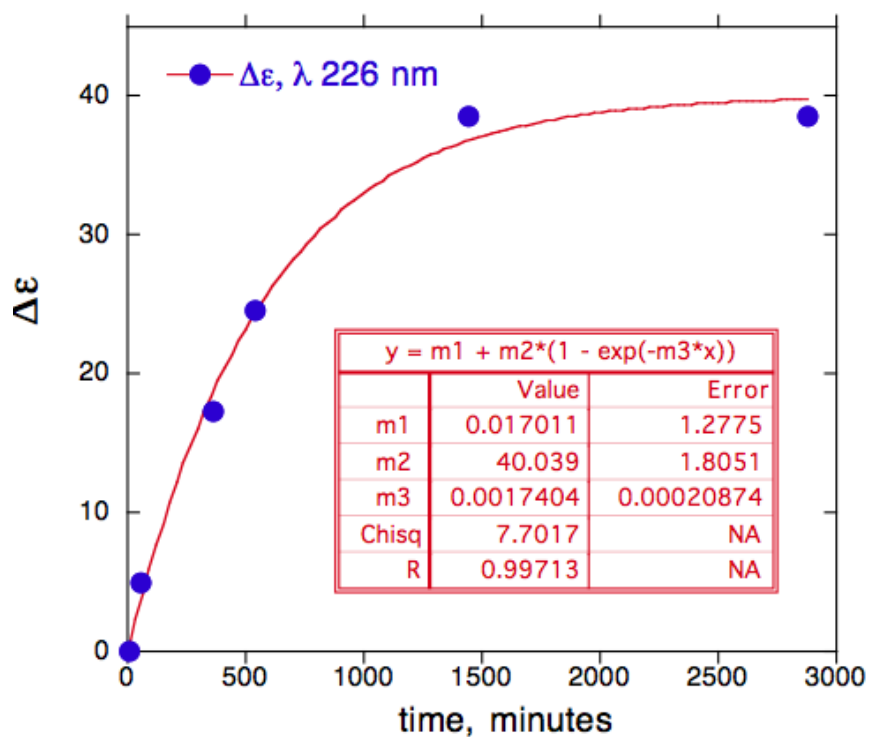

**Figure S2.** Time-dependent 'growth curve ( $T = 23\text{ }^{\circ}\text{C}$ ) of the Cotton effect ( $\lambda$  226 nm) in the L-CD spectrum of **7** [see Figure 2(c)]. Insert shows exponential fit ( $t_{1/2} = 385$  min).

**Table S4.** Tabulated Cotton effects in L-CD spectra of (2*R*,6*S*)-**7**, (2*S*,6*R*)-**8**, (2*R*,6*R*)-**9** and (2*S*,6*S*)-**9** from Figure S1.

| # | (2 <i>R</i> ,6 <i>S</i> )- <b>7</b> |                  | (2 <i>S</i> ,6 <i>R</i> )- <b>8</b> |                  | (2 <i>R</i> ,6 <i>R</i> )- <b>9</b> |                  | (2 <i>S</i> ,6 <i>S</i> )- <b>9</b> <sup>a</sup> |                  |
|---|-------------------------------------|------------------|-------------------------------------|------------------|-------------------------------------|------------------|--------------------------------------------------|------------------|
|   | $\lambda$ nm                        | $\Delta\epsilon$ | $\lambda$ nm                        | $\Delta\epsilon$ | $\lambda$ nm                        | $\Delta\epsilon$ | $\lambda$ nm                                     | $\Delta\epsilon$ |
| 1 | 197                                 | -12.3            | 196                                 | 11.0             | 201                                 | -19.5            | 201                                              | +19.5            |
| 2 | 213                                 | +37.2            | 212                                 | -34.0            | 217                                 | +17.5            | 217                                              | -17.5            |
| 3 | 227                                 | -7.6             | 226                                 | +27.3            | 256                                 | +1.7             | 256                                              | -1.7             |
| 4 | 255                                 | +4.7             | 258                                 | -4.9             | 265                                 | -6.2             | 255                                              | +6.2             |

<sup>a</sup> calculated by inversion of L-CD of (2*R*,6*R*)-**9**

## Synthesis of Standards 8 and 9:

### (*S*)-(5,9-Dimethyldec-8-en-1-ynyl)benzene (**12**)

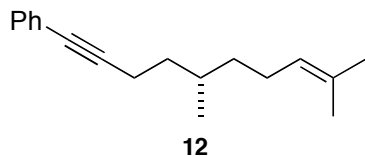

*n*-BuLi (2.5 M in hexanes, 9.00 mL, 22.5 mmol) was added to a solution of phenylacetylene (2.64 mL, 24.0 mmol) in THF (60 mL) at 0 °C and the mixture warmed to r.t. then heated at reflux for three hours. The reaction was cooled to r.t., the (*S*)-tosylate **11**<sup>2</sup> (2.33 g, 7.50 mmol), prepared from (–)-**10** (obtained by NaBH<sub>4</sub> reduction of (–)-(*S*)-citronellal, Takasago, 98% ee) according to standard procedures, was added dropwise and the resulting mixture heated at reflux for a further 19 hours. The reaction was cooled to r.t., diluted with Et<sub>2</sub>O and carefully quenched with water. The aqueous phase was extracted with Et<sub>2</sub>O and the combined organic extracts washed with water and brine, dried (Na<sub>2</sub>SO<sub>4</sub>) and concentrated under reduced pressure to give the crude product. Purification by flash chromatography (hexanes) gave the alkyne **12** (1.65 g, 92%) as a colorless liquid; FTIR (ATR):  $\nu$  2961, 2913, 2852, 2233, 1599, 1490, 1452, 1442, 1377, 1358, 1323, 1112, 1069, 1025, 911, 829, 754, 690 cm<sup>-1</sup>; [ $\alpha$ ]<sub>D</sub><sup>20</sup> –3.21 (*c* 3.00, CH<sub>2</sub>Cl<sub>2</sub>); <sup>1</sup>H NMR (400 MHz, CDCl<sub>3</sub>):  $\delta$  7.43-7.41 (m, 2H), 7.30-7.28 (m, 3H), 5.15 (dt, *J* = 7.2, 1.6 Hz, 1H), 2.52-2.37 (m, 2H), 2.12-1.96 (m, 2H), 1.72 (s, 3H), 1.68 (m, 1H), 1.65 (s, 3H), 1.51-1.37 (m, 2H), 1.27-1.18 (m, 2H), 0.96 (d, *J* = 6.8 Hz, 3H); <sup>13</sup>C NMR (100 MHz, CDCl<sub>3</sub>):  $\delta$  131.5 (CH), 131.1 (C), 128.1 (CH), 127.4 (CH), 124.8 (CH), 124.1 (C), 90.4 (C), 80.5 (C), 36.7 (CH<sub>3</sub>), 35.7 (CH<sub>3</sub>), 31.7 (CH<sub>2</sub>), 25.7 (CH<sub>2</sub>), 25.4 (CH), 19.1 (CH<sub>2</sub>), 17.6 (CH<sub>2</sub>), 17.1 (CH<sub>3</sub>); HRESIMS *m/z* 241.1952 [M+H]<sup>+</sup>, calcd. 241.1951 for C<sub>18</sub>H<sub>25</sub>.

### (*R*)-2,6-Dimethyl-10-phenyldec-9-yne-2,3-diol (**13**)

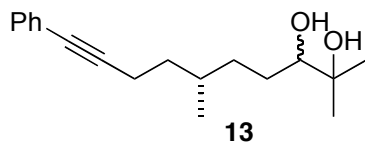

OsO<sub>4</sub> (0.2 M in *t*-BuOH, 818  $\mu$ L, 0.164 mmol) and a solution of alkene **12** (786 mg, 3.27 mmol) in acetone (3.7 mL) were added to a suspension of K<sub>3</sub>Fe(CN)<sub>6</sub> (3.23 g, 9.81 mmol) and K<sub>2</sub>CO<sub>3</sub> (1.36 g, 9.81 mmol) in *t*-BuOH/ water (1:1 v/v, 25 mL) and the mixture stirred at r.t. for 15 hours. A second batch of OsO<sub>4</sub> (0.2 M in *t*-BuOH, 409  $\mu$ L, 0.0820 mmol) was added and the mixture stirred at r.t. for a further 22 hours. The reaction was quenched with sat. aq. Na<sub>2</sub>SO<sub>3</sub> and the aqueous phase extracted with EtOAc. The combined organic extracts were washed with brine, dried (Na<sub>2</sub>SO<sub>4</sub>) and concentrated under reduced pressure to give the crude product. Purification by flash chromatography (5:95  $\rightarrow$  30:70 EtOAc:hexanes) gave the diol **13** (719 mg, 80%, 1:1 mixture of diastereomers) as a colorless oil; FTIR (ATR):  $\nu$  3385, 2950, 2924, 2869, 2854, 1598, 1490, 1461, 1442, 1378, 1323, 1278, 1158, 1098, 1068, 963, 948, 914, 754, 690 cm<sup>-1</sup>; <sup>1</sup>H NMR (400 MHz, CDCl<sub>3</sub>):  $\delta$  7.39-7.37 (m, 2H), 7.29-7.24 (m, 3H), 3.32 (m, 1H), 2.72 (br s, 1H), 2.54 (br s), 2.50-2.34 (m, 2H), 1.72-1.59 (m, 2H), 1.55-1.17 (m, 5H), 1.19 (s, 3H), 1.14 (s, 3H), 0.94 (d, *J* = 6.4 Hz, 1.5H), 0.93 (d, *J* = 6.4 Hz, 1.5H); <sup>13</sup>C NMR (100 MHz, CDCl<sub>3</sub>):  $\delta$  131.4 (CH), 128.1 (CH), 127.4 (CH), 123.91/123.89 (C), 90.32/90.29 (C), 80.49/80.47 (C), 78.9/78.6 (CH), 73.18/73.15 (C), 35.8/35.5 (CH<sub>2</sub>), 33.8/33.5 (CH<sub>2</sub>), 32.1/31.9 (CH), 29.0/28.9 (CH<sub>2</sub>), 26.43/26.42 (CH<sub>3</sub>), 23.0 (CH<sub>3</sub>), 19.3/19.0 (CH<sub>3</sub>), 17.08/17.05 (CH<sub>2</sub>); HRESIMS *m/z* 292.2282 [M+NH<sub>4</sub>]<sup>+</sup>, calcd. 292.2271 for C<sub>18</sub>H<sub>30</sub>NO<sub>2</sub>.

(2) (a) Mori, K.; Masuda, S.; Suguro, T. *Tetrahedron* **1981**, *37*, 1329-1340. (b) Mori, K.; Harashima, S. *Liebigs Ann. Chem.* **1993**, 391-401.

### (*R*)-4-Methyl-8-phenyloct-7-ynal (**14**)

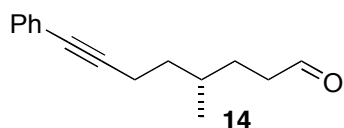

NaIO<sub>4</sub> (377 mg, 1.76 mmol) was added to a solution of the diol **13** (372 mg, 1.35 mmol) in THF/water (1:1 v/v, 24 mL) and the mixture stirred at r.t. for 13 hours. The reaction was diluted with water and the aqueous phase extracted with Et<sub>2</sub>O. The combined organic extracts were washed with water and brine, dried (Na<sub>2</sub>SO<sub>4</sub>) and concentrated under reduced pressure to give the crude product. Purification by flash chromatography (10:90 EtOAc:hexanes) gave the aldehyde **14** (247 mg, 85%) as a colorless oil; FTIR (ATR):  $\nu$  2956, 2927, 2871, 1708, 1599, 1490, 1453, 1442, 1380, 1280, 1175, 1070, 1023, 913, 756, 692 cm<sup>-1</sup>; [ $\alpha$ ]<sub>D</sub><sup>20</sup> -3.86° (*c* 2.36, CH<sub>2</sub>Cl<sub>2</sub>); <sup>1</sup>H NMR (400 MHz, CDCl<sub>3</sub>):  $\delta$  9.79 (t, *J* = 6.0 Hz, 1H), 7.40-7.37 (m, 2H), 7.29-7.26 (m, 3H), 2.54-2.32 (m, 3H), 1.77-1.61 (m, 4H), 1.54-1.43 (m, 2H), 0.95 (d, *J* = 6.4 Hz, 3H); <sup>13</sup>C NMR (100 MHz, CDCl<sub>3</sub>):  $\delta$  202.7 (CH), 131.5 (CH), 128.2 (CH), 127.5 (CH), 123.9 (C), 89.9 (C), 80.7 (C), 41.6 (CH<sub>2</sub>), 35.4 (CH<sub>2</sub>), 31.6 (CH), 28.5 (CH<sub>2</sub>), 19.0 (CH<sub>3</sub>), 17.1 (CH<sub>2</sub>); HREIMS *m/z* 214.1352 [M]<sup>+</sup>, calcd. 214.1358 for C<sub>15</sub>H<sub>18</sub>O.

### *E/Z*-(*S*)-Ethyl 2,6-dimethyl-10-phenyldec-2-en-9-ynoate (**15**)

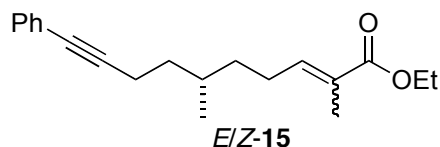

*n*-BuLi (2.25 M in hexanes, 232  $\mu$ L, 0.522 mmol) was added to a solution of triethyl 2-phosphonopropionate (126  $\mu$ L, 0.588 mmol) in THF (3.3 mL) at -78 °C and the mixture stirred at -78 °C for 30 minutes. The reaction was then warmed to 0 °C for 10 minutes and re-cooled to -78 °C. The aldehyde **13** (70.0 mg, 0.327 mmol) in THF (1.2 mL) was added and the mixture stirred at -78 °C for 1.5 hours. The reaction was quenched with sat. aq. NH<sub>4</sub>Cl, warmed to r.t. and the aqueous phase extracted with Et<sub>2</sub>O. The combined organic extracts were washed with water and brine, dried (Na<sub>2</sub>SO<sub>4</sub>) and concentrated under reduced pressure to give the crude product. Purification by flash chromatography (5:95 EtOAc:hexanes) gave the alkene **15** (73.3 mg, 75%, 1:1 *E:Z*) as a colorless oil; FTIR (ATR):  $\nu$  2955, 2926, 2871, 2854, 1709, 1649, 1599, 1490, 1456, 1442, 1376, 1368, 1271, 1248, 1211, 1177, 1146, 1095, 1071, 1028, 912, 756, 691 cm<sup>-1</sup>; <sup>1</sup>H NMR (400 MHz, CDCl<sub>3</sub>):  $\delta$  7.40-7.37 (m, 2H), 7.30-7.24 (m, 3H), 6.77 (dt, *J* = 7.6, 1.6 Hz, 0.5H), 5.92 (dt, *J* = 7.6, 1.6 Hz, 0.5H), 4.20 (q, *J* = 7.6 Hz, 1H), 4.17 (q, *J* = 7.6 Hz, 1H), 2.57-2.35 (m, 3H), 2.21 (m, 1H), 1.89 (d, *J* = 1.6 Hz, 1.5H), 1.85 (d, *J* = 1.6 Hz, 1.5H), 1.71-1.62 (m, 2H), 1.57-1.42 (m, 2H), 1.30 (m, 1H), 1.30 (t, *J* = 7.6 Hz, 1.5H), 1.28 (t, *J* = 7.6 Hz, 1.5H), 0.95 (d, *J* = 6.4 Hz, 1.5H), 0.94 (d, *J* = 6.4 Hz, 1.5H); <sup>13</sup>C NMR (100 MHz, CDCl<sub>3</sub>):  $\delta$  168.13/168.05 (C), 142.9/142.1 (CH), 131.4 (CH), 128.09/128.08 (CH), 127.6/127.0 (C), 127.42/127.37 (CH), 124.0/123.9 (C), 90.2/90.1 (C), 80.6/80.5 (C), 60.3/60.0 (CH<sub>2</sub>), 36.1/35.3 (CH<sub>2</sub>), 35.55/35.51 (CH<sub>2</sub>), 31.7 (CH), 27.0/26.2 (CH<sub>2</sub>), 20.6 (CH<sub>3</sub>), 19.0/18.9 (CH<sub>3</sub>), 17.0 (CH<sub>2</sub>), 14.2/12.3 (CH<sub>3</sub>); HRESIMS *m/z* 299.2006 [M+H]<sup>+</sup>, calcd. 299.2001 for C<sub>20</sub>H<sub>26</sub>O<sub>2</sub>.

### (2*ξ*,6*R*)-Ethyl 2,6-dimethyl-10-phenyldecanoate (**16**)

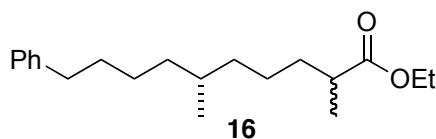

A mixture of the enyne **15** (185 mg, 0.620 mmol) and Pd/C (10% wt, 33.0 mg, 0.0310 mmol) in MeOH (4 mL) was stirred under 1 atm of H<sub>2</sub> for five hours. The reaction mixture was evacuated, then filtered through a short pad of Celite and concentrated under reduced pressure to give the crude product. Purification by flash chromatography (4:96 EtOAc:hexanes) gave the saturated ester **16** (179 mg, 95%. 1:1 mixture of C2 epimers) as a colorless oil; FTIR (ATR):  $\nu$  3026, 2929, 2857, 1734, 1496, 1463, 1455, 1377, 1257, 1178, 1160, 1096, 1030,

746, 698  $\text{cm}^{-1}$ ;  $^1\text{H}$  NMR (400 MHz,  $\text{CDCl}_3$ ):  $\delta$  7.30-7.26 (m, 2H), 7.20-7.16 (m, 3H), 4.14 (q,  $J = 7.2$  Hz, 2H), 2.62 (t,  $J = 7.6$  Hz, 2H), 2.43 (m, 1H), 1.70-1.56 (m, 4H), 1.46-1.24 (m, 10H), 1.27 (t,  $J = 7.2$  Hz, 3H), 1.15 (d,  $J = 7.2$  Hz, 3H), 1.16-1.10 (m, 2H), 0.85 (d,  $J = 6.4$  Hz, 3H);  $^{13}\text{C}$  NMR (100 MHz,  $\text{CDCl}_3$ ):  $\delta$  176.9 (C), 142.8 (C), 128.3 (CH), 128.2 (CH), 125.5 (CH), 60.0 ( $\text{CH}_2$ ), 39.54/39.51 (CH), 36.80 ( $\text{CH}_2$ ), 36.78 ( $\text{CH}_2$ ), 36.0 ( $\text{CH}_2$ ), 34.10/34.06 ( $\text{CH}_2$ ), 32.5 (CH), 31.8 ( $\text{CH}_2$ ), 26.7 ( $\text{CH}_2$ ), 24.63/24.60 ( $\text{CH}_2$ ), 19.6 ( $\text{CH}_3$ ), 17.1/17.0 ( $\text{CH}_3$ ), 14.2 ( $\text{CH}_3$ ); HRESIMS  $m/z$  305.2478  $[\text{M}+\text{H}]^+$ , calcd. 305.2475 for  $\text{C}_{20}\text{H}_{33}\text{O}_2$ .

### (*R*)-2,6-Dimethyl-10-phenyldecanoic acid (**17**)

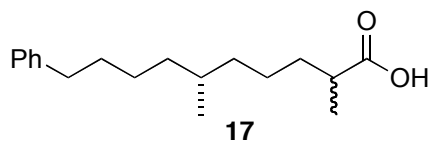

LiOH (1.25 M in water, 3.36 mL, 4.20 mmol) was added to a solution of ester **16** (160 mg, 0.526 mmol) in THF/water (7:3 v/v, 5 mL) and the mixture stirred at r.t. for 20 hours then at 100  $^\circ\text{C}$  for a further 20 hours. The organic solvent was removed under reduced pressure and the aqueous residue acidified to pH 2 with 2.4M HCl then extracted with  $\text{CH}_2\text{Cl}_2$ . The combined organic extracts were dried ( $\text{Na}_2\text{SO}_4$ ) and concentrated under reduced pressure to give the crude product, which was purified by flash chromatography (0.1:15:94.9 AcOH:EtOAc:hexanes) to give the acid **17** (135 mg, 93%, 1:1 mixture of diastereomers) as a colorless oil; FTIR (ATR):  $\nu$  3026, 2926, 2855, 1703, 1604, 1496, 1463, 1455, 1416, 1378, 1290, 1238, 1030, 941, 910, 744, 697  $\text{cm}^{-1}$ ;  $^1\text{H}$  NMR (400 MHz,  $\text{CDCl}_3$ ):  $\delta$  7.33-7.29 (m, 2H), 7.22-7.19 (m, 3H), 2.64 (t,  $J = 8.0$  Hz, 2H), 2.49 (m, 1H), 1.78-1.59 (m, 4H), 1.50-1.29 (m, 10H), 1.22 (d,  $J = 7.2$  Hz, 3H), 1.18-1.13 (m, 2H), 0.80 (d,  $J = 6.4$  Hz, 3H);  $^{13}\text{C}$  NMR (100 MHz,  $\text{CDCl}_3$ ):  $\delta$  183.6 (C), 142.8 (C), 128.4 (CH), 128.2 (CH), 125.5 (CH), 39.41/39.38 (CH), 36.81 ( $\text{CH}_2$ ), 36.78 ( $\text{CH}_2$ ), 36.0 ( $\text{CH}_2$ ), 33.8/33.7 ( $\text{CH}_2$ ), 32.5 (CH), 31.8 ( $\text{CH}_2$ ), 27.0 ( $\text{CH}_2$ ), 24.57/24.55 ( $\text{CH}_2$ ), 19.6 ( $\text{CH}_3$ ), 16.8/16.7 ( $\text{CH}_3$ ); HRESIMS  $m/z$  275.2011  $[\text{M}-\text{H}]^-$ , calcd. 275.2011 for  $\text{C}_{18}\text{H}_{27}\text{O}_2$ .

### (2*S*,6*R*)-2,6-Dimethyl-10-phenyl-*N*-((*S*)-1-phenylethyl)decanamide (**18**) and (2*R*,6*R*)-2,6-Dimethyl-10-phenyl-*N*-((*S*)-1-phenylethyl)decanamide (**19**)

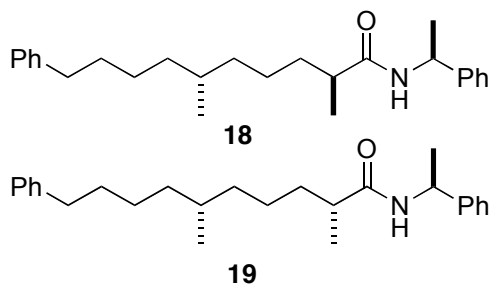

(*S*)-(-)-1-Phenylethylamine (74.8  $\mu\text{L}$ , 0.588 mmol), HATU (224 mg, 0.588 mmol) and *i*-Pr<sub>2</sub>NEt (137  $\mu\text{L}$ , 0.784 mmol) were added to a solution of acid **17** (135 mg, 0.490 mmol) in DMF (10 mL) and the mixture stirred at r.t. for 19 hours. Evaporation of the solvent under reduced pressure gave the crude product, which was purified by flash chromatography (24:76  $\rightarrow$  40:60 Et<sub>2</sub>O:hexanes, dry-load) to give amides **18** (87.6 mg, 47%) and **19** (87.1 mg, 47%) as white solids; Data for **18**: FTIR (ATR):  $\nu$  3280, 3084, 3061, 3027, 2962, 2927, 2854, 1637, 1539, 1495, 1452, 1375, 1242, 1127, 1110, 1073, 1030, 1019, 943, 908, 745, 696  $\text{cm}^{-1}$ ;  $[\alpha]_{\text{D}}^{21}$  -50.6 (*c* 3.33,  $\text{CH}_2\text{Cl}_2$ );  $^1\text{H}$  NMR (500 MHz,  $\text{CDCl}_3$ ):  $\delta$  7.36-7.25 (m, 7H), 7.19-7.15 (m, 3H), 5.62 (br d,  $J = 7.8$  Hz, 1H), 5.15 (dq,  $J = 7.2$ , 7.2 Hz, 1H), 2.60 (t,  $J = 7.7$  Hz, 2H), 2.14 (m, 1H), 1.68-1.55 (m, 3H), 1.49 (d,  $J = 6.9$  Hz, 3H), 1.40-1.21 (m, 8H), 1.11 (d,  $J = 6.9$  Hz, 3H), 1.15-1.05 (m, 2H), 0.83 (d,  $J = 6.6$  Hz, 3H);  $^{13}\text{C}$  NMR (100 MHz,  $\text{CDCl}_3$ ):  $\delta$  175.5 (C), 143.3 (C), 142.8 (C), 128.5 (CH), 128.3 (CH), 128.1 (CH), 127.2 (CH), 126.1 (CH), 125.5 (CH), 48.3 (CH), 41.5 (CH), 36.9 ( $\text{CH}_2$ ), 36.8 ( $\text{CH}_2$ ), 35.9 ( $\text{CH}_2$ ), 34.6 ( $\text{CH}_2$ ), 32.5 (CH), 31.7 ( $\text{CH}_2$ ), 26.7 ( $\text{CH}_2$ ), 24.8 ( $\text{CH}_2$ ), 21.6 ( $\text{CH}_3$ ), 19.6 ( $\text{CH}_3$ ), 17.9 ( $\text{CH}_3$ ); HRESIMS  $m/z$  380.2947  $[\text{M}+\text{H}]^+$ , calcd. 380.2953 for  $\text{C}_{26}\text{H}_{38}\text{NO}$ . Data for **19**: FTIR (ATR):  $\nu$  3280, 3084, 3062, 3027, 2962, 2926, 2854, 1638, 1540, 1495, 1452, 1376, 1241, 1129, 1073, 1030, 1019, 941, 908, 745, 697  $\text{cm}^{-1}$ ;  $[\alpha]_{\text{D}}^{21}$  -35.0 (*c* 3.33,  $\text{CH}_2\text{Cl}_2$ );  $^1\text{H}$  NMR (500 MHz,  $\text{CDCl}_3$ ):  $\delta$  7.34-7.22 (m, 7H), 7.19-7.16

(m, 3H), 5.63 (br d,  $J = 7.7$  Hz, 1H), 5.15 (dq,  $J = 6.9, 6.9$  Hz, 1H), 2.59 (t,  $J = 7.7$  Hz, 2H), 2.14 (m, 1H), 1.62-1.53 (m, 3H), 1.49 (d,  $J = 6.9$  Hz, 3H), 1.37-1.20 (m, 8H), 1.14 (d,  $J = 6.9$  Hz, 3H), 1.12-1.01 (m, 2H), 0.78 (d,  $J = 6.6$  Hz, 3H);  $^{13}\text{C}$  NMR (100 MHz,  $\text{CDCl}_3$ ):  $\delta$  175.6 (C), 143.4 (C), 142.8 (C), 128.5 (CH), 128.3 (CH), 128.2 (CH), 127.2 (CH), 126.1 (CH), 125.5 (CH), 48.3 (CH), 41.6 (CH), 36.9 (CH<sub>2</sub>), 36.8 (CH<sub>2</sub>), 35.9 (CH<sub>2</sub>), 34.7 (CH<sub>2</sub>), 32.6 (CH), 31.8 (CH<sub>2</sub>), 26.7 (CH<sub>2</sub>), 24.9 (CH<sub>2</sub>), 21.6 (CH<sub>3</sub>), 19.5 (CH<sub>3</sub>), 17.8 (CH<sub>3</sub>); HRESIMS  $m/z$  380.2949  $[\text{M}+\text{H}]^+$ , calcd. 380.2953 for  $\text{C}_{26}\text{H}_{38}\text{NO}$ .

**(2*S*,6*R*)-2,6-Dimethyl-10-phenyl-*N*-((*S*)-1-phenylethyl)decan-1-amine (20)**

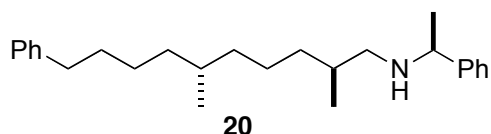

$\text{BH}_3 \cdot \text{THF}$  (1.0 M in THF, 474  $\mu\text{L}$ , 0.474 mmol) was added dropwise to the amide **18** (36.0 mg, 0.0948 mmol) in THF (575  $\mu\text{L}$ ) at 0  $^\circ\text{C}$  and the mixture heated at reflux for 3.5 hours. The reaction was cooled to 0  $^\circ\text{C}$ , quenched with 20% aq. NaOH (1 mL) and heated at 50  $^\circ\text{C}$  for 45 minutes. The mixture was re-cooled to r.t., extracted with  $\text{CH}_2\text{Cl}_2$  and the combined organic extracts dried ( $\text{Na}_2\text{SO}_4$ ) and concentrated under reduced pressure to give the crude product. Purification by flash chromatography (1:99  $\rightarrow$  8:92 MeOH: $\text{CH}_2\text{Cl}_2$ ) gave the amine **20** (31.2 mg, 90%) as a colorless oil; FTIR (ATR):  $\nu$  3084, 3061, 3025, 2924, 2854, 1604, 1552, 1494, 1452, 1376, 1369, 1352, 1304, 1248, 1208, 1126, 1073, 1029, 991, 909, 760, 745, 698  $\text{cm}^{-1}$ ;  $[\alpha]_{\text{D}}^{21} -29.4$  ( $c$  3.11,  $\text{CH}_2\text{Cl}_2$ );  $^1\text{H}$  NMR (400 MHz,  $\text{CDCl}_3$ ):  $\delta$  7.35-7.24 (m, 7H), 7.19-7.17 (m, 3H), 3.74 (q,  $J = 6.4$  Hz, 1H), 2.61 (t,  $J = 7.6$  Hz, 2H), 2.45 (dd,  $J = 11.6, 5.2$  Hz, 2H), 2.17 (dd,  $J = 11.6, 7.6$  Hz, 2H), 1.83 (br s, 1H), 1.65-1.54 (m, 2H), 1.36 (d,  $J = 6.8$  Hz, 3H), 1.42-1.02 (m, 12H), 0.88 (d,  $J = 6.4$  Hz, 3H), 0.82 (d,  $J = 6.8$  Hz, 3H);  $^{13}\text{C}$  NMR (125 MHz,  $\text{CDCl}_3$ ):  $\delta$  145.9 (C), 142.9 (C), 128.34 (CH), 128.33 (CH), 128.2 (CH), 126.7 (CH), 126.6 (CH), 125.5 (CH), 58.4 (CH), 54.2 (CH<sub>2</sub>), 37.3 (CH<sub>2</sub>), 36.8 (CH<sub>2</sub>), 36.0 (CH<sub>2</sub>), 35.4 (CH<sub>2</sub>), 33.3 (CH), 32.7 (CH), 31.8 (CH<sub>2</sub>), 26.7 (CH<sub>2</sub>), 24.5 (CH<sub>3</sub>), 24.4 (CH<sub>2</sub>), 19.7 (CH<sub>3</sub>), 18.2 (CH<sub>3</sub>); HRESIMS  $m/z$  366.3153  $[\text{M}+\text{H}]^+$ , calcd. 366.3161 for  $\text{C}_{26}\text{H}_{40}\text{N}$ .

**(2*R*,6*R*)-2,6-Dimethyl-10-phenyl-*N*-((*S*)-1-phenylethyl)decan-1-amine (21)**

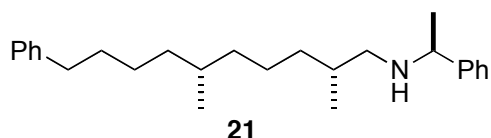

$\text{BH}_3 \cdot \text{THF}$  (1.0 M in THF, 327  $\mu\text{L}$ , 0.327 mmol) was added dropwise to the amide **19** (24.8 mg, 0.0654 mmol) in THF (350  $\mu\text{L}$ ) at 0  $^\circ\text{C}$  and the mixture heated at reflux for four hours. The reaction was cooled to 0  $^\circ\text{C}$ , quenched with 20% aq. NaOH (1 mL) and heated at 50  $^\circ\text{C}$  for 45 minutes. The mixture was re-cooled to r.t., extracted with  $\text{CH}_2\text{Cl}_2$  and the combined organic extracts dried ( $\text{Na}_2\text{SO}_4$ ) and concentrated under reduced pressure to give the crude product. Purification by flash chromatography (1:99  $\rightarrow$  5:95 MeOH: $\text{CH}_2\text{Cl}_2$ ) gave the amine **21** (17.1 mg, 72%) as a colorless oil; FTIR (ATR):  $\nu$  3084, 3061, 3025, 2924, 2854, 1604, 1552, 1494, 1452, 1376, 1351, 1303, 1246, 1211, 1126, 1074, 1029, 909, 760, 744, 697  $\text{cm}^{-1}$ ;  $[\alpha]_{\text{D}}^{20} -23.6$  ( $c$  3.19,  $\text{CH}_2\text{Cl}_2$ );  $^1\text{H}$  NMR (500 MHz,  $\text{CDCl}_3$ ):  $\delta$  7.35-7.22 (m, 7H), 7.19-7.16 (m, 3H), 3.74 (q,  $J = 6.6$  Hz, 1H), 2.61 (t,  $J = 7.7$  Hz, 2H), 2.31 (d,  $J = 6.6$  Hz, 2H), 1.71 (br s, 1H), 1.64-1.53 (m, 2H), 1.36 (d,  $J = 6.6$  Hz, 3H), 1.40-1.19 (m, 10H), 1.15-0.99 (m, 2H), 0.87 (d,  $J = 6.9$  Hz, 3H), 0.83 (d,  $J = 6.3$  Hz, 3H);  $^{13}\text{C}$  NMR (125 MHz,  $\text{CDCl}_3$ ):  $\delta$  145.9 (C), 142.9 (C), 128.4 (CH), 128.3 (CH), 128.2 (CH), 126.8 (CH), 126.6 (CH), 125.5 (CH), 58.4 (CH), 54.3 (CH<sub>2</sub>), 37.2 (CH<sub>2</sub>), 36.9 (CH<sub>2</sub>), 36.0 (CH<sub>2</sub>), 35.0 (CH<sub>2</sub>), 33.3 (CH), 32.6 (CH), 31.9 (CH<sub>2</sub>), 26.8 (CH<sub>2</sub>), 24.4 (CH<sub>3</sub>), 24.2 (CH<sub>2</sub>), 19.6 (CH<sub>3</sub>), 18.1 (CH<sub>3</sub>); HRESIMS  $m/z$  366.3157  $[\text{M}+\text{H}]^+$ , calcd. 366.3161 for  $\text{C}_{26}\text{H}_{40}\text{N}$ .

### (2*S*,6*R*)-2,6-Dimethyl-10-phenyldecan-1-amine (**22**)

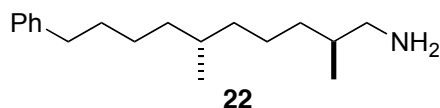

A mixture of secondary amine **20** (27.3 mg, 74.7  $\mu\text{mol}$ ) and Pd/C (10% wt, 15.9 mg, 14.9  $\mu\text{mol}$ ) in  $\text{CF}_3\text{CH}_2\text{OH}$  (3.8 mL) was stirred under 1 atm of  $\text{H}_2$  for 17 hours. The reaction mixture was

evacuated, then filtered through a short pad of Celite and concentrated under reduced pressure to give the crude product. Purification by flash chromatography (4:6 MeOH: $\text{CH}_2\text{Cl}_2$ ) gave the primary amine **22** (18.0 mg, 92%) as a yellow oil; FTIR (ATR):  $\nu$  2925, 2855, 1571, 1496, 1463, 1455, 1377, 1308, 745, 698  $\text{cm}^{-1}$ ;  $[\alpha]_{\text{D}}^{21} +5.33$  (*c* 3.08,  $\text{CH}_2\text{Cl}_2$ );  $^1\text{H}$  NMR (400 MHz,  $\text{CD}_3\text{OD}$ ):  $\delta$  7.26-7.22 (m, 2H), 7.16-7.11 (m, 3H), 2.88 (dd,  $J = 12.4, 6.0$  Hz, 1H), 2.71 (dd,  $J = 12.4, 8.0$  Hz, 1H), 2.60 (t,  $J = 7.6$  Hz, 2H), 1.78 (m, 1H), 1.62-1.12 (m, 13H), 1.01 (d,  $J = 6.8$  Hz, 3H), 0.87 (d,  $J = 6.4$  Hz, 3H);  $^{13}\text{C}$  NMR (125 MHz,  $\text{CD}_3\text{OD}$ ):  $\delta$  143.9 (C), 129.4 (CH), 129.2 (CH), 126.6 (CH), 48.0 (CH), 38.4 ( $\text{CH}_2$ ), 37.9 ( $\text{CH}_2$ ), 36.9 ( $\text{CH}_2$ ), 36.3 (CH), 35.7 ( $\text{CH}_2$ ), 33.9 (CH), 33.0 ( $\text{CH}_2$ ), 27.7 ( $\text{CH}_2$ ), 25.4 ( $\text{CH}_2$ ), 20.1 ( $\text{CH}_3$ ), 17.8 ( $\text{CH}_3$ ); HRESIMS  $m/z$  262.2528  $[\text{M}+\text{H}]^+$ , calcd. 262.2535 for  $\text{C}_{18}\text{H}_{32}\text{N}$ .

### (2*R*,6*R*)-2,6-Dimethyl-10-phenyldecan-1-amine (**23**)

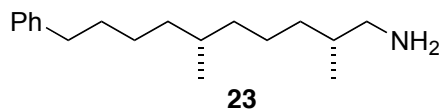

A mixture of secondary amine **21** (10.5 mg, 28.7  $\mu\text{mol}$ ) and Pd/C (10% wt, 6.1 mg, 5.7  $\mu\text{mol}$ ) in  $\text{CF}_3\text{CH}_2\text{OH}$  (1.5 mL) was stirred under 1 atm of  $\text{H}_2$  for 20 hours. The reaction mixture was

evacuated, then filtered through a short pad of Celite and concentrated under reduced pressure to give the crude product. Purification by flash chromatography (4:6 MeOH: $\text{CH}_2\text{Cl}_2$ ) gave the primary amine **23** (5.4 mg, 72%) as a yellow oil; FTIR (ATR):  $\nu$  2925, 2854, 1573, 1496, 1463, 1455, 1377, 1327, 1309, 1277, 748, 698  $\text{cm}^{-1}$ ;  $[\alpha]_{\text{D}}^{21} -4.60$  (*c* 2.96,  $\text{CH}_2\text{Cl}_2$ );  $^1\text{H}$  NMR (400 MHz,  $\text{CD}_3\text{OD}$ ):  $\delta$  7.25-7.22 (m, 2H), 7.16-7.12 (m, 3H), 2.87 (dd,  $J = 12.8, 5.9$  Hz, 1H), 2.70 (dd,  $J = 12.8, 8.0$  Hz, 1H), 2.60 (t,  $J = 7.6$  Hz, 2H), 1.77 (m, 1H), 1.62-1.56 (m, 2H), 1.43-1.26 (m, 9H), 1.21-1.11 (m, 2H), 1.00 (d,  $J = 6.6$  Hz, 3H), 0.87 (d,  $J = 6.6$  Hz, 3H);  $^{13}\text{C}$  NMR (125 MHz,  $\text{CD}_3\text{OD}$ ):  $\delta$  144.0 (C), 129.4 (CH), 129.2 (CH), 126.6 (CH), 48.7 (CH), 38.4 ( $\text{CH}_2$ ), 38.1 ( $\text{CH}_2$ ), 36.9 ( $\text{CH}_2$ ), 36.5 (CH), 35.7 ( $\text{CH}_2$ ), 33.9 (CH), 33.1 ( $\text{CH}_2$ ), 27.7 ( $\text{CH}_2$ ), 25.4 ( $\text{CH}_2$ ), 20.1 ( $\text{CH}_3$ ), 17.7 ( $\text{CH}_3$ ); HRESIMS  $m/z$  262.2535  $[\text{M}+\text{H}]^+$ , calcd. 262.2535 for  $\text{C}_{18}\text{H}_{32}\text{N}$ .

### *N*-((2*S*,6*R*)-2,6-Dimethyl-10-phenyldecyl)-6-methoxy-2-naphthamide (**8**)

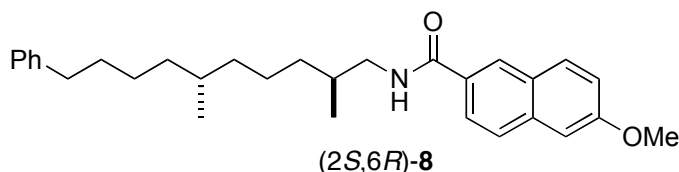

6-Methoxy-2-naphthoyl chloride (8.6 mg, 39  $\mu\text{mol}$ ),  $\text{Et}_3\text{N}$  (9.1  $\mu\text{L}$ , 65  $\mu\text{mol}$ ) and DMAP (1 crystal) were added to the amine **22** (3.4 mg, 13  $\mu\text{mol}$ ) in  $\text{CH}_2\text{Cl}_2$  (350  $\mu\text{L}$ ) and the mixture stirred at r.t. for 16 hours.

3-(Dimethylamino)propylamine (4.9  $\mu\text{L}$ , 39  $\mu\text{mol}$ ) was added and the resulting mixture stirred vigorously at r.t. for 30 minutes. The solvent was evaporated under reduced pressure to give the crude product, which was purified by flash chromatography (15:85 EtOAc/hexanes) to give the naphthamide (2*S*,6*R*)-**8** (3.7 mg, 64%) as a white solid; FTIR (ATR):  $\nu$  3317, 2923, 2851, 1629, 1604, 1541, 1503, 1481, 1462, 1455, 1390, 1299, 1261, 1214, 1165, 1093, 1031, 904, 855, 807, 746, 698  $\text{cm}^{-1}$ ;  $[\alpha]_{\text{D}}^{21} +1.82$  (*c* 3.14,  $\text{CH}_2\text{Cl}_2$ );  $^1\text{H}$  NMR (400 MHz,  $\text{CDCl}_3$ ):  $\delta$  8.20 (s, 1H), 7.83-7.76 (m, 3H), 7.29-7.25 (m, 5H), 7.21-7.16 (m, 2H), 6.23 (m, 1H), 3.94 (s, 3H), 3.46 (m, 1H), 3.31 (m, 1H), 2.60 (t,  $J = 7.6$  Hz, 2H), 1.78 (m, 1H), 1.43-1.08 (m, 15H), 1.00 (d,  $J = 7.2$  Hz, 3H), 0.85 (d,  $J = 6.0$  Hz, 3H);  $^{13}\text{C}$  NMR (125 MHz,  $\text{CDCl}_3$ ):  $\delta$  167.7 (C), 158.9 (C), 142.9 (C), 136.1 (C), 130.4 (CH), 129.9 (C), 128.4 (CH), 128.2

(CH), 128.0 (C), 127.1 (CH), 127.0 (CH), 125.5 (CH), 124.1 (CH), 119.7 (CH), 105.6 (CH), 55.3 (CH<sub>3</sub>), 46.1 (CH<sub>2</sub>), 37.3 (CH<sub>2</sub>), 36.8 (CH<sub>2</sub>), 36.0 (CH<sub>2</sub>), 34.9 (CH<sub>2</sub>), 33.5 (CH), 32.7 (CH), 31.8 (CH<sub>2</sub>), 26.7 (CH<sub>2</sub>), 24.4 (CH<sub>2</sub>), 19.7 (CH<sub>3</sub>), 17.8 (CH<sub>3</sub>); HRESIMS  $m/z$  446.3046 [M+H]<sup>+</sup>, calcd. 446.3059 for C<sub>30</sub>H<sub>40</sub>NO<sub>2</sub>.

***N*-((2*R*,6*R*)-2,6-Dimethyl-10-phenyldecyl)-6-methoxy-2-naphthamide (9)**

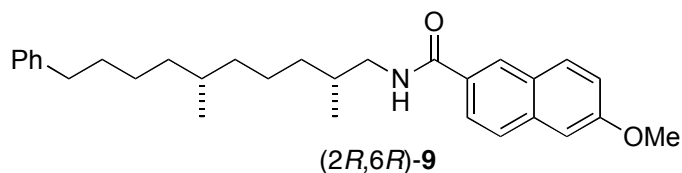

6-Methoxy-2-naphthoyl chloride (22.3 mg, 101  $\mu$ mol), Et<sub>3</sub>N (21.1  $\mu$ L, 151  $\mu$ mol) and DMAP (1 crystal) were added to the amine **23** (6.6 mg, 25  $\mu$ mol) in CH<sub>2</sub>Cl<sub>2</sub> (0.7 mL) and the mixture stirred at r.t. for 16 hours.

3-(Dimethylamino)propylamine (12.7  $\mu$ L, 101  $\mu$ mol) was added and the resulting mixture stirred vigorously at r.t. for 30 minutes. The solvent was evaporated under reduced pressure to give the crude product, which was purified by flash chromatography (1:9 EtOAc/hexanes) to give the naphthamide (2*R*,6*R*)-**9** (6.2 mg, 55%) as a white solid; FTIR (ATR):  $\nu$  3326, 2923, 2850, 1631, 1604, 1542, 1503, 1481, 1462, 1455, 1391, 1298, 1261, 1215, 1166, 1092, 1031, 855, 805, 746, 698 cm<sup>-1</sup>; [ $\alpha$ ]<sub>D</sub><sup>21</sup> -3.41 (*c* 3.02, CH<sub>2</sub>Cl<sub>2</sub>); <sup>1</sup>H NMR (400 MHz, CDCl<sub>3</sub>):  $\delta$  8.20 (s, 1H), 7.83-7.76 (m, 3H), 7.29-7.25 (m, 5H), 7.21-7.16 (m, 2H), 6.23 (m, 1H), 3.94 (s, 3H), 3.45 (m, 1H), 3.32 (m, 1H), 2.59 (t, *J* = 7.6 Hz, 2H), 1.79 (m, 1H), 1.43-1.10 (m, 15H), 1.00 (d, *J* = 6.8 Hz, 3H), 0.84 (d, *J* = 6.8 Hz, 3H); <sup>13</sup>C NMR (125 MHz, CDCl<sub>3</sub>):  $\delta$  167.6 (C), 159.0 (C), 142.9 (C), 136.2 (C), 130.4 (CH), 129.9 (C), 128.4 (CH), 128.2 (CH), 128.0 (C), 127.1 (CH), 127.0 (CH), 125.5 (CH), 124.1 (CH), 119.7 (CH), 105.6 (CH), 55.4 (CH<sub>3</sub>), 46.1 (CH<sub>2</sub>), 37.2 (CH<sub>2</sub>), 36.9 (CH<sub>2</sub>), 36.0 (CH<sub>2</sub>), 34.8 (CH<sub>2</sub>), 33.5 (CH), 32.7 (CH), 31.8 (CH<sub>2</sub>), 26.8 (CH<sub>2</sub>), 24.4 (CH<sub>2</sub>), 19.6 (CH<sub>3</sub>), 17.8 (CH<sub>3</sub>); HRESIMS  $m/z$  446.3051 [M+H]<sup>+</sup>, calcd. 446.3059 for C<sub>30</sub>H<sub>40</sub>NO<sub>2</sub>.



07.26.171.B.2.1.2.16

Figure S3: <sup>1</sup>H NMR (400 MHz, CDCl<sub>3</sub>)

exp2 std1h

|             |                   |   |      |           |         |
|-------------|-------------------|---|------|-----------|---------|
| SAMPLE      | date              | 2 | 2007 | DEC. & VT | 400.056 |
| solvent     | CDCl <sub>3</sub> |   |      | H1        |         |
| file        | exp               |   |      | 30        |         |
| ACQUISITION |                   |   |      | 0         |         |
| sfrq        | 400.056           |   |      | nmr       |         |
| tn          | H1                |   |      | C         |         |
| at          | 1.993             |   |      | 200       |         |
| np          | 23936             |   |      |           |         |
| sw          | 6006.0            |   |      |           |         |
| fd          | not used          |   |      |           |         |
| bs          | 16                |   |      |           |         |
| tpwr        | 57                |   |      |           |         |
| pw          | 7.0               |   |      |           |         |
| d1          | 1.000             |   |      |           |         |
| tof         | 0                 |   |      |           |         |
| nt          | 160               |   |      |           |         |
| ct          | 64                |   |      |           |         |
| alock       | not used          |   |      |           |         |
| gain        | not used          |   |      |           |         |
| FLAGS       |                   |   |      |           |         |
| i1          | n                 |   |      |           |         |
| in          | n                 |   |      |           |         |
| dp          | Y                 |   |      |           |         |
| DISPLAY     |                   |   |      |           |         |
| SP          | -1031.8           |   |      |           |         |
| WP          | 6005.6            |   |      |           |         |
| VS          | 150               |   |      |           |         |
| SC          | 0                 |   |      |           |         |
| WC          | 250               |   |      |           |         |
| hzm         | 3.34              |   |      |           |         |
| is          | 500.00            |   |      |           |         |
| rfl         | 1032.2            |   |      |           |         |
| rffl        | 0                 |   |      |           |         |
| th          | 20                |   |      |           |         |
| ins         | 100.000           |   |      |           |         |
| nm          | cdc               |   |      |           |         |
| ph          |                   |   |      |           |         |

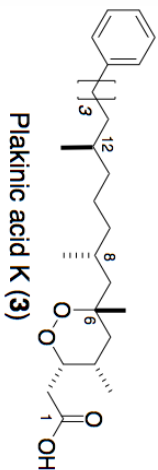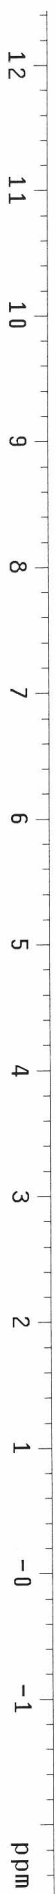

07.26.171.B.2.1.B.16.13C  
exp2 std13C

Figure S4: <sup>13</sup>C NMR (100 MHz, CDCl<sub>3</sub>)

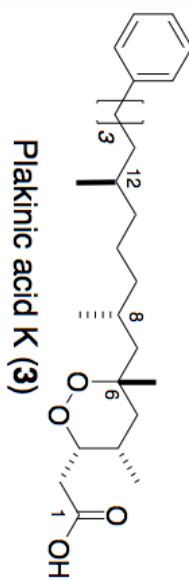

```
DEC. & VT
date Oct 5 2007 dfrq 399.911
solvent CDCl3 dn H1
file exp dpwr 38
ACQUISITION dof 0
sfrq 100.567 dm yyy
ln C13 dnm w
at 1.500 dmf 9700
np 75000 PROCESSING 3.00
sw 25000.0 lb wffile ft
fb 13800 wffile not used
bs 16 proc fn
ss 4
tpwr 58
pw 6.5 werr
d1 2.000 wexp
tof 0 wbs
nt 10000 wnt
ct 272
alock n
gain not used
flags not used
i1 n
in n
dp y
DISPLAY
sp -2987.8
wp 24999.6
vs 112
sc 0
wc 250
h2mm 1.63
ts 500.00
ffl 10747.1
rfp 7759.0
th 20
ins 100.000
nm
```

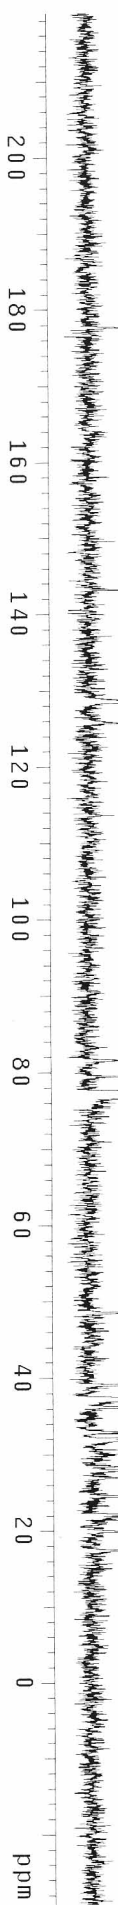

07.26.171.B.2.1.B.16.gCOSY

Pulse Sequence: gCOSY

Solvent: CDCl3

Ambient temperature

F1 file: 07.20.171.B.2.1.B.16.gCOSY

Mercury-400BBB "h9402"

Relax. delay 1.000 sec

Acq. time 0.168 sec

Width 3052.5 Hz

2D Width 3052.5 Hz

4 repetitions

128 increments

OBSERVE H1, 399.9089997 MHz

DATA PROCESSING

Sq. sine bell 0.084 sec

F1 DATA PROCESSING

Sq. sine bell 0.042 sec

FT size 1024 x 1024

Total time 11 min, 28 sec

Figure S5: COSY (CDCl3, 400MHz)

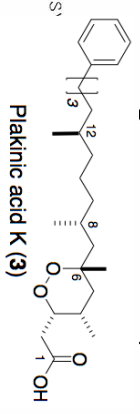

COSY (CDCl3, 400MHz)

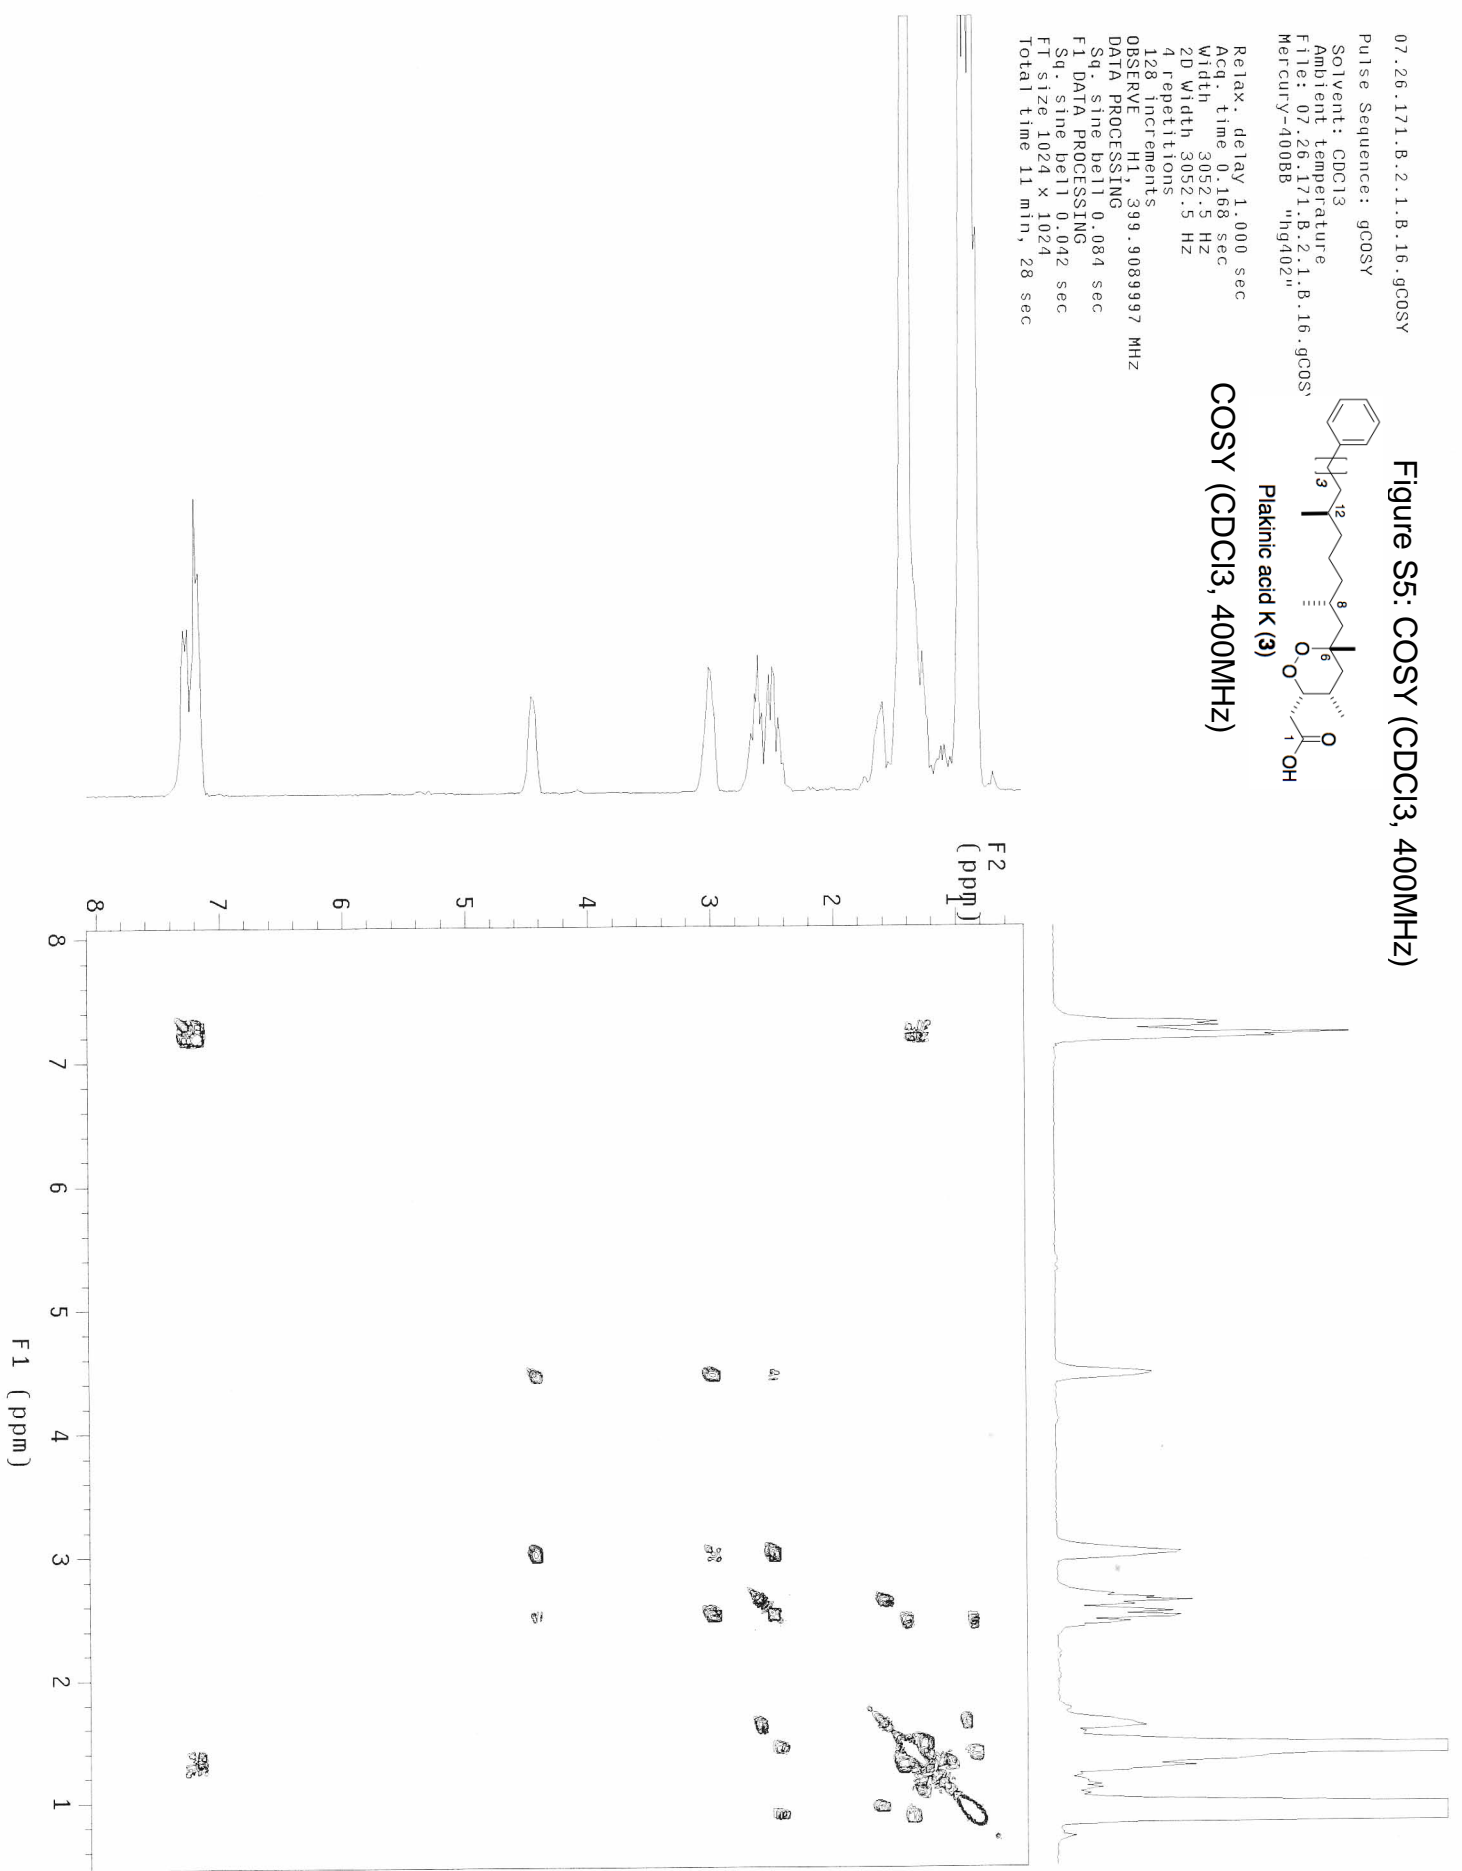

Figure S6: HSQC (CDCl<sub>3</sub>, 600 MHz)

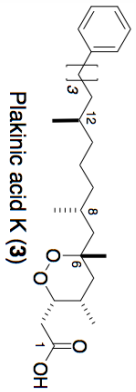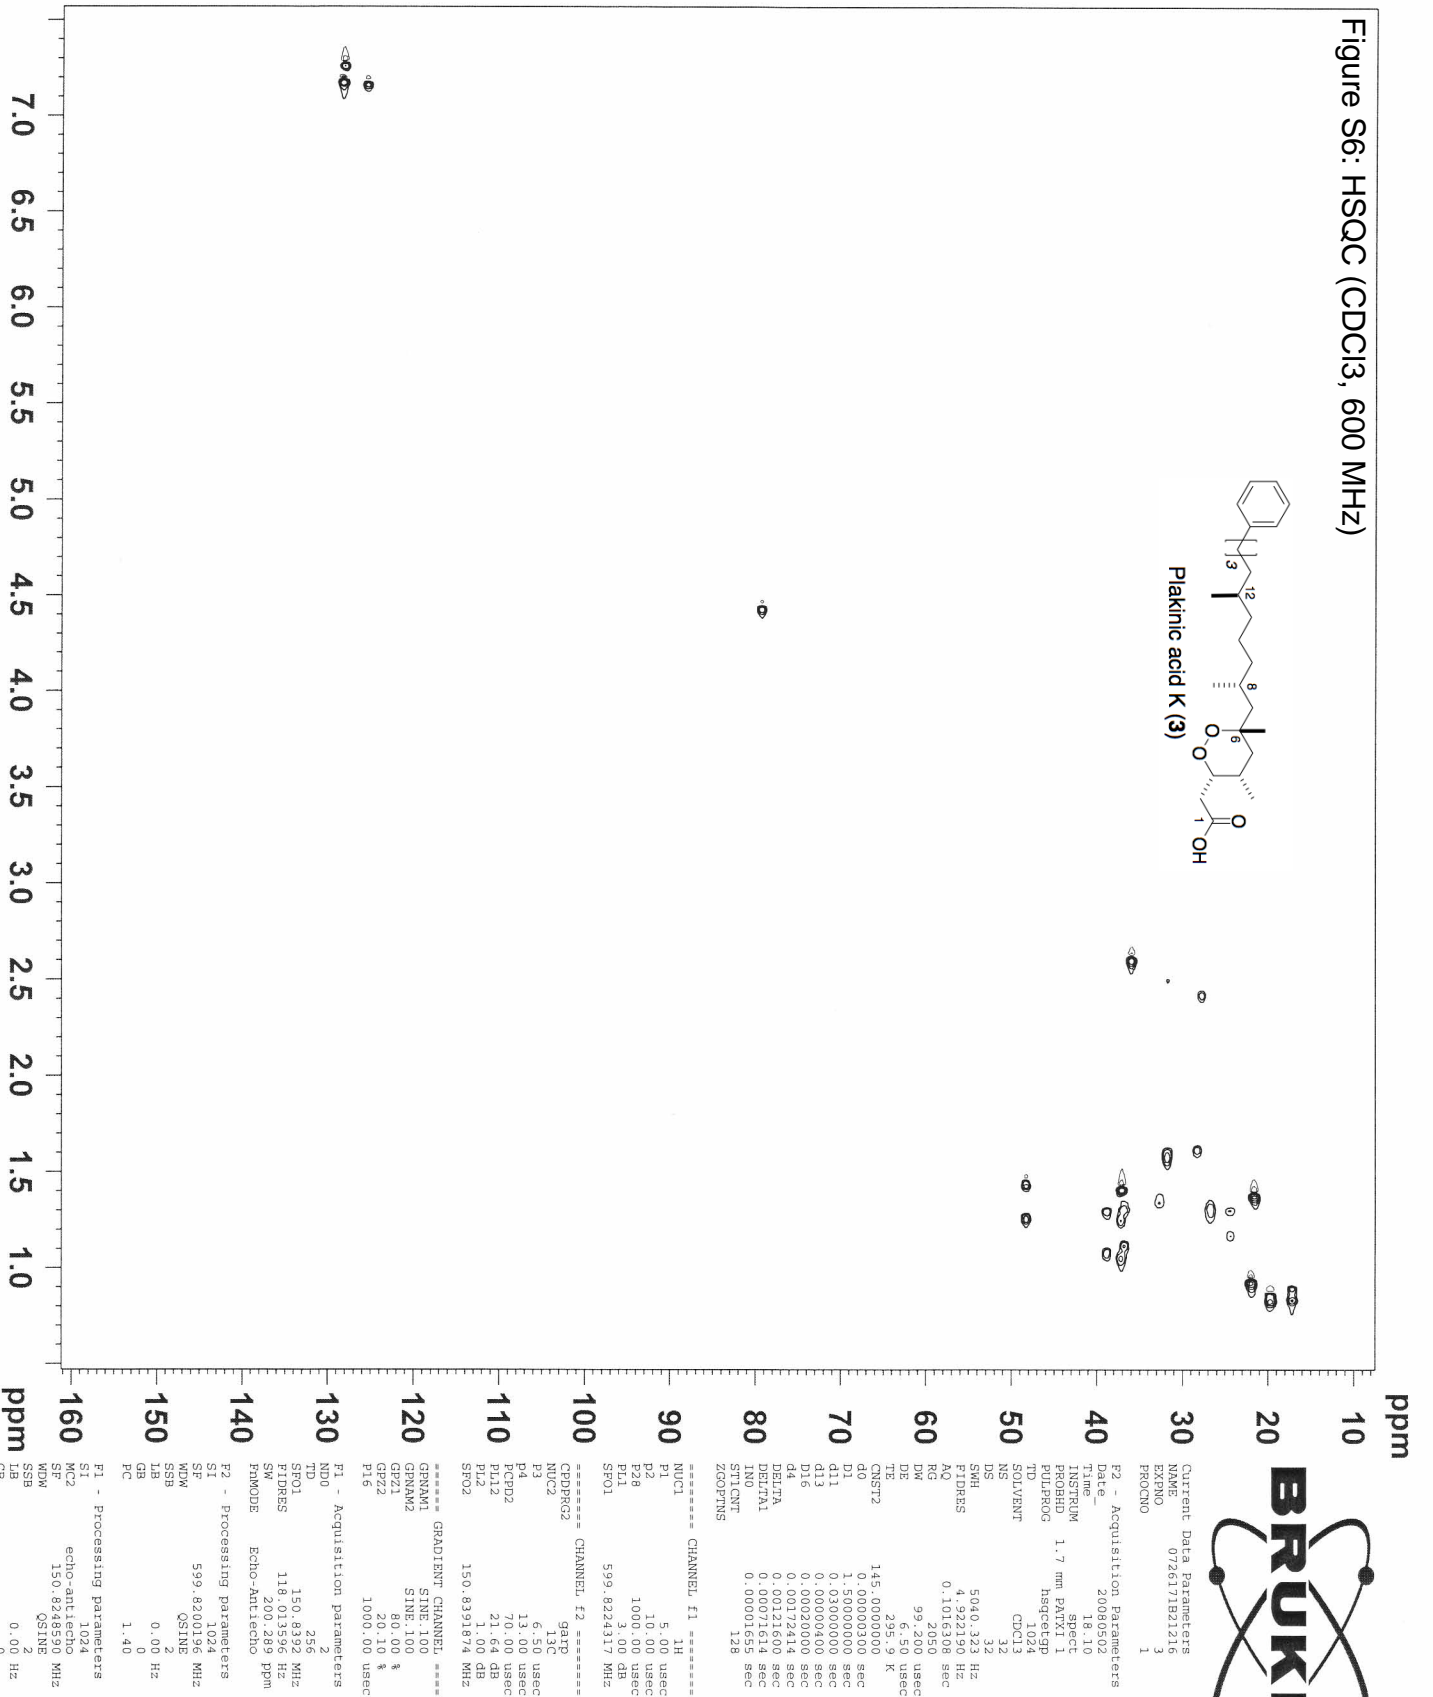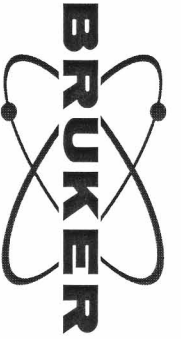

Current Data Parameters  
 NAME 0726171R21216  
 EXPNO 3  
 F2 - Acquisition Parameters  
 Date\_ 20080502  
 Time 18.10  
 INSTRUM spect  
 PROBHD 1.7 mm PAKXI 1  
 PULPROG zgpg30  
 SOLVENT CDCl3  
 NS 32  
 DS 32  
 SWH 5040.323 Hz  
 FIDRES 4.922190 Hz  
 AQ 0.1016308 sec  
 RG 2050  
 RM 6.50  
 DR 99.250 usec  
 DE 235.9 K  
 TE 300.2 K  
 CNST2 145.00000000  
 d0 0.00000300 sec  
 d1 1.50000000 sec  
 d11 0.03000000 sec  
 d13 0.00000400 sec  
 d16 0.00020000 sec  
 d2 0.00000000 sec  
 DELTA 0.0023600 sec  
 DELTA1 0.0007614 sec  
 INO 0.00001655 sec  
 ST1CNT 128  
 ZCOPTMS

CHANNEL F1  
 NUCL 1H  
 P1 5.00 usec  
 P2 10.00 usec  
 F28 1000.00 usec  
 PL1 3.00 dB  
 SFO1 599.8224317 MHz

CHANNEL F2  
 CPDPRG2 g4f2  
 NUCL2 13C  
 P3 6.50 usec  
 P4 13.00 usec  
 PCPD2 70.00 usec  
 PL12 21.64 dB  
 PL2 1.00 dB  
 SFO2 150.8391874 MHz

GRADIENT CHANNEL  
 ST1A10 SINE: 100  
 GPNAM2 SINE: 100  
 GPZ2 80.00 %  
 GPZ3 20.10 %  
 PL6 1000.00 usec

Acquisition parameters  
 MD0 35  
 SFO1 150.8392 MHz  
 FIDRES 118.013596 Hz  
 SW 200.289 ppm  
 FMODE Echo-Antiecho

Processing parameters  
 S1 1024  
 SF 599.8200196 MHz  
 W 65536  
 SSB 0.00 Hz  
 GB 0  
 PC 1.40

Processing parameters  
 SI 1024  
 SF 130.9246500 MHz  
 W 1309246.500  
 SSB 0.00 Hz  
 GB 0

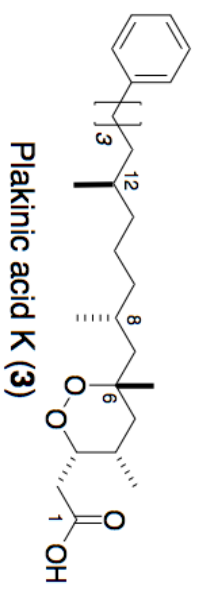

Figure S7: HMBC (600 MHz, CDCl<sub>3</sub>)

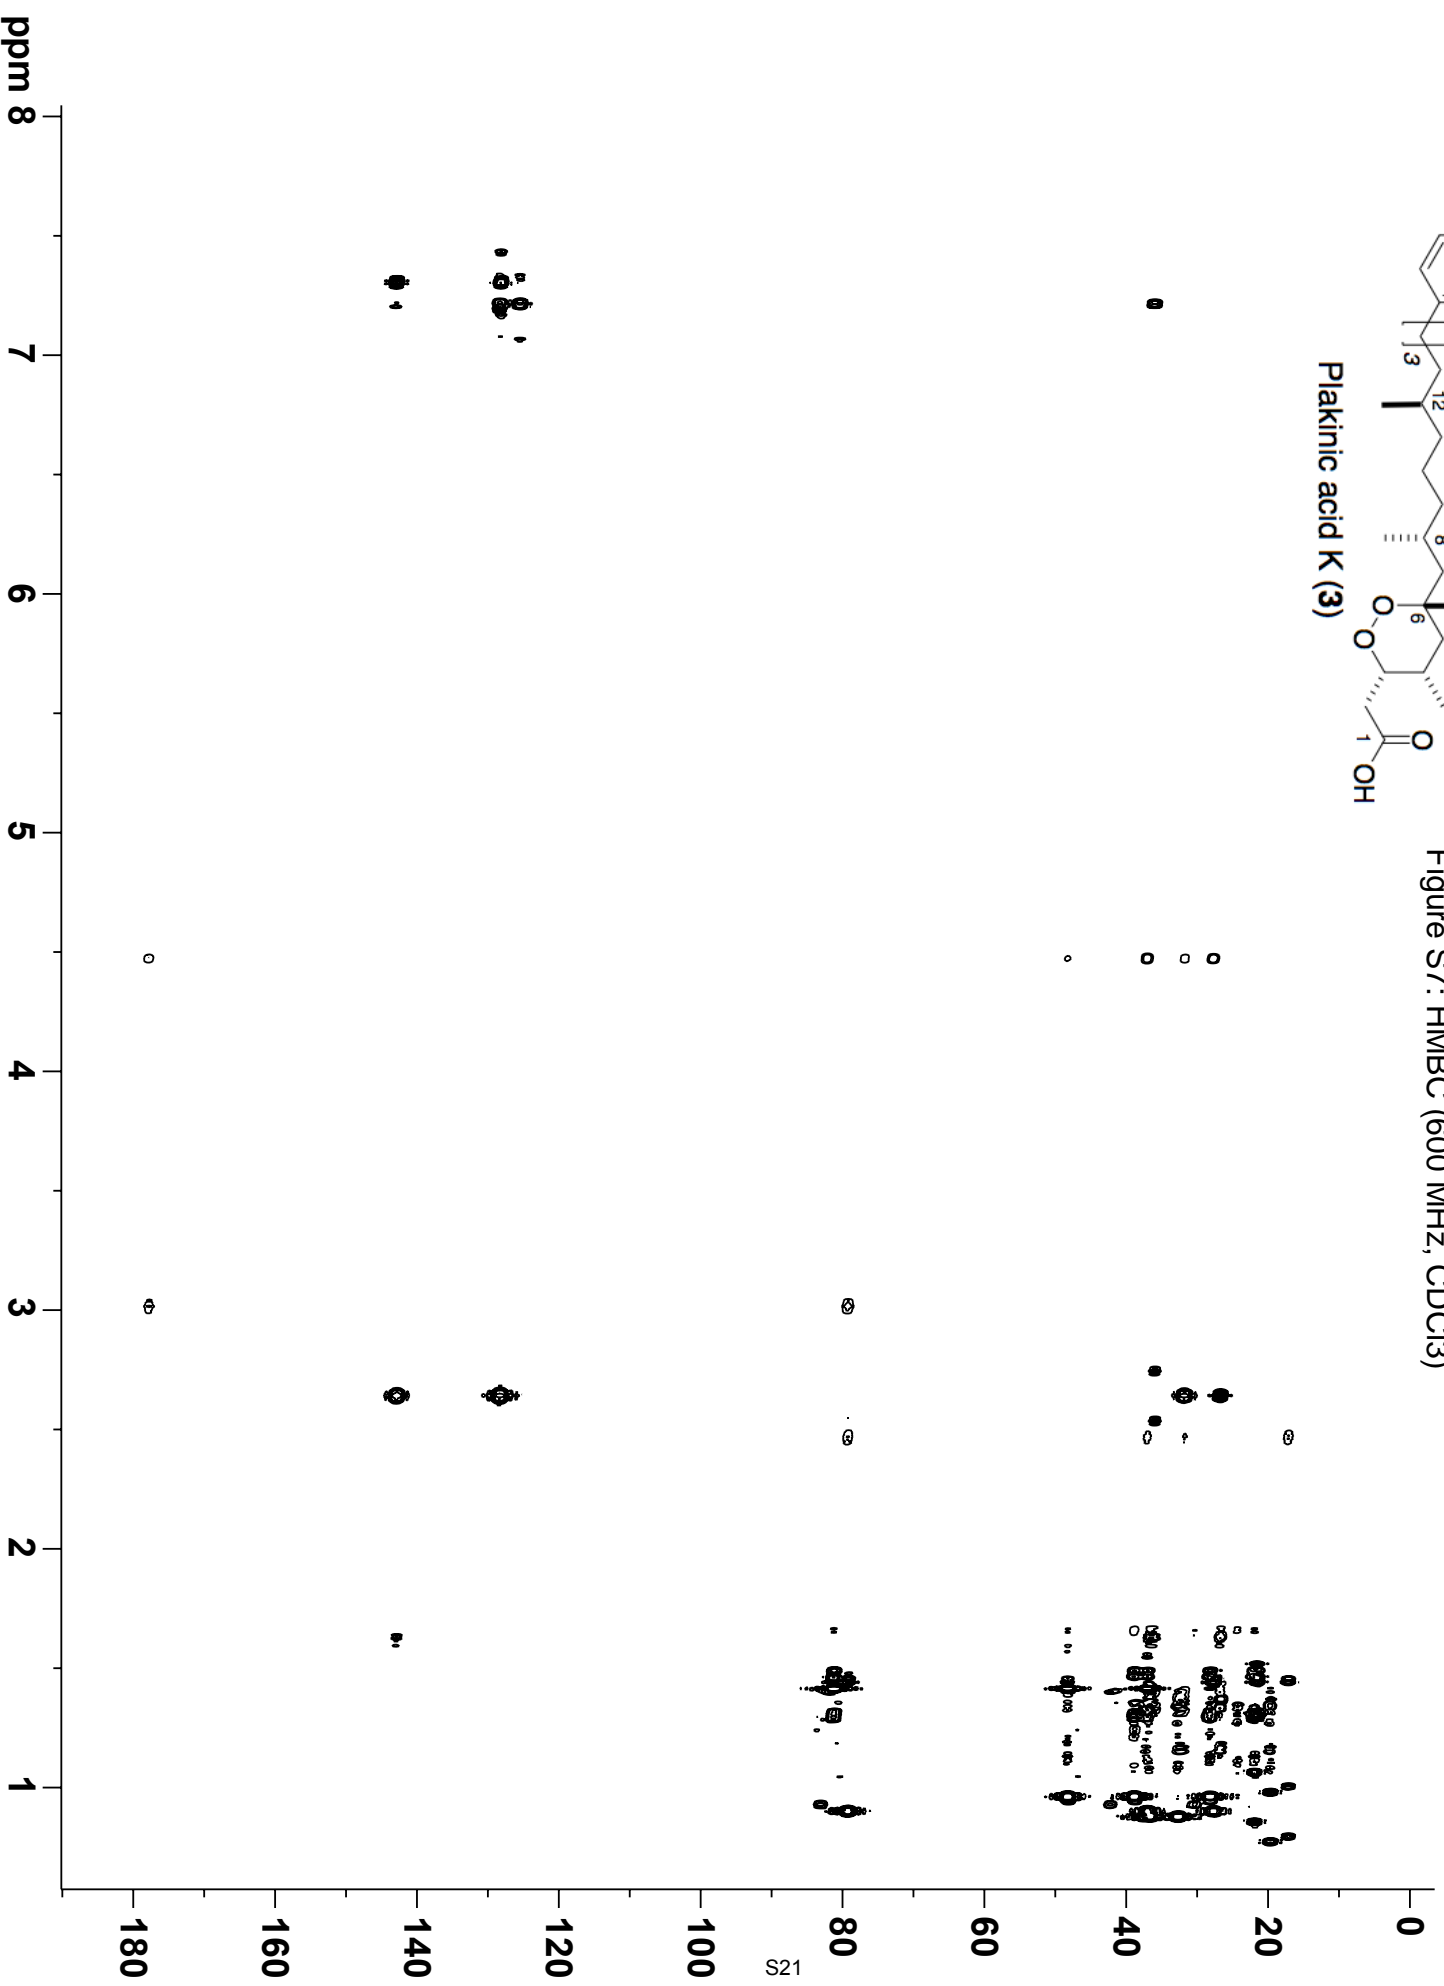

07.26.171.B.2.1.2.14

exp2 std1h

Figure S8: <sup>1</sup>H NMR (400 MHz, CDCl<sub>3</sub>)

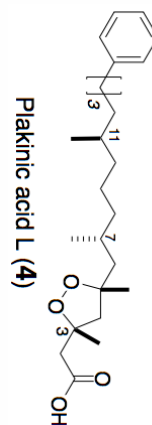

|             |                   |            |          |
|-------------|-------------------|------------|----------|
| date        | Oct 5 2007        | DEC. & VT  | 400.056  |
| solvent     | CDCl <sub>3</sub> | dn         | H1       |
| file        | exp               | dpwr       | 30       |
| ACQUISITION |                   | doF        | 0        |
| sfrq        | 400.056           | dm         | nmn      |
| tn          | H1                | dmm        | C        |
| at          | 1.993             | dmf        | 200      |
| np          | 23936             | PROCESSING | 0.15     |
| sw          | 6006.0            | lb         |          |
| fb          | not used          | wf1te      | ft       |
| bs          | 16                | proc       | not used |
| ss          | 4                 | tn         |          |
| tpwr        | 57                |            |          |
| pw          | 7.0               | werr       |          |
| dl          | 1.000             | wexp       |          |
| tof         | 0                 | wbs        |          |
| nt          | 320               | wrt        |          |
| ct          | 96                |            |          |
| alock       | not used          |            |          |
| gain        | not used          |            |          |
| flags       |                   |            |          |
| il          | n                 |            |          |
| in          | n                 |            |          |
| dp          | Y                 |            |          |
| DISPLAY     |                   |            |          |
| sp          | -1031.8           |            |          |
| wp          | 6005.6            |            |          |
| vs          | 77                |            |          |
| vc          | 0                 |            |          |
| wc          | 250               |            |          |
| hzm         | 2.38              |            |          |
| is          | 500.00            |            |          |
| rfl         | 1032.2            |            |          |
| rffp        | 0                 |            |          |
| th          | 20                |            |          |
| ins         | 100.000           |            |          |
| nm          | cdc               |            |          |
| ph          |                   |            |          |

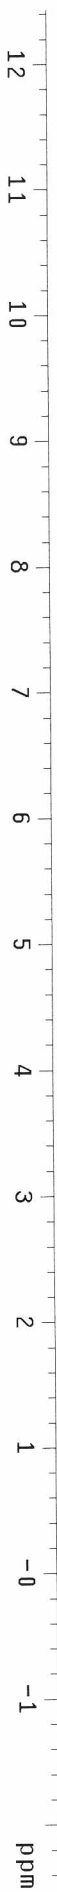

07.26.171.B.2.1.2.14.13C  
expl std13C

Figure S9: <sup>13</sup>C NMR (100 MHz, CDCl<sub>3</sub>)

SAMPLE DEC. & VT  
date Oct 7 2007 dfrq 399.911  
solvent CDCl<sub>3</sub> dn H1  
file /export/home/~ molinski/ddal/say/~ dof 38  
07.26.171.B.2.1.2.~ dm 0  
14.13C.f1d dnm yyy  
w 9700  
ACQUISITION dmf 100.567  
PROCESSING  
sfrq 100.567  
ln C13 1b 5.00  
at 2.000 wtf file  
np 100000 proc ft  
sw 25000.0 fn not used  
fb 13800  
bs 16 werr  
ss 4 wexp  
lpwr 58 wbs  
pw 6.5 wnt  
d1 3.000  
tof 0  
nt 10000  
ct 10000  
alock n  
gain not used  
FLAGS  
i1 n  
in n  
dn y  
DISPLAY  
SP -2977.6  
WD 24999.6  
VS 7.49  
SC 0  
WC 250  
hzm 16.95  
ts 500.00  
rf1 2977.9  
rfp 0  
th 20  
ins 100.000  
nm no ph

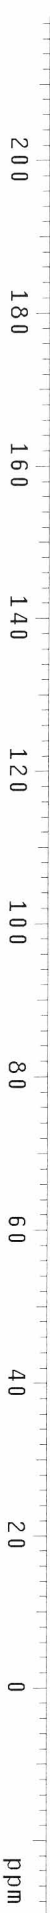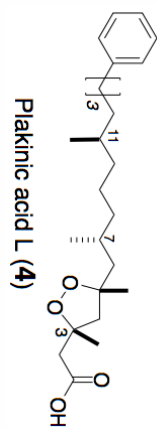

07.26.171.B.2.1.2.14.gCOSY  
 expt1 gCOSY

Figure S10: COSY (400 MHz, CDCl3)

| SAMPLE      | date           | Oct 7 2007    | hs       | nm |
|-------------|----------------|---------------|----------|----|
| SOLVENT     | CDCl3          | sspul         | n        |    |
| SAMPLE      | undefined      | hsq1v1        | 994      |    |
| ACQUISITION | 3448.3         | temp          | not used |    |
| at          | 0.148          | gain          | 20       |    |
| np          | 1024           | spin          | 0        |    |
| fb          | not used       | F2 PROCESSING |          |    |
| ss          | 16             | sb            | -0.074   |    |
| d1          | 1.000          | sbs           | not used |    |
| nt          | 2D ACQUISITION | fn            | 1024     |    |
| SW1         | 3448.3         | F1 PROCESSING |          |    |
| n1          | 128            | sb1           | -0.037   |    |
| TRANSMITTER | H1             | sbs1          | not used |    |
| tn          | 399.911        | proc1         | 1p       |    |
| sfrq        | -444.0         | fn1           | 1024     |    |
| tof         | 55             | DISPLAY       |          |    |
| lpwr        | 13.900         | sp            | -135.7   |    |
| PW          | GRADIENTS      | wp            | 3441.5   |    |
| g21v11      | 994            | sp1           | -131.6   |    |
| g11         | 0.001000       | wp1           | 3441.5   |    |
| gstab       | 0.000500       | rf1           | 142.4    |    |
| DECOUPLER   | H1             | rf11          | 138.3    |    |
| dm          | nmn            | rfb1          | 0        |    |
| PL1         | WC             | PL1           |          |    |
| PL2         | WC             | PL2           | 155.0    |    |
| PL3         | WC2            | PL3           | 10.0     |    |
| PL4         | WC2            | PL4           | 155.0    |    |
| PL5         | SC2            | PL5           | 155.0    |    |
| PL6         | VS             | PL6           | 65       |    |
| PL7         | th             | PL7           | 7        |    |
| PL8         | ai             | PL8           | cdc      |    |
| PL9         | av             | PL9           |          |    |

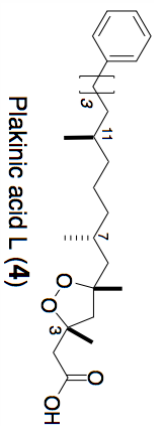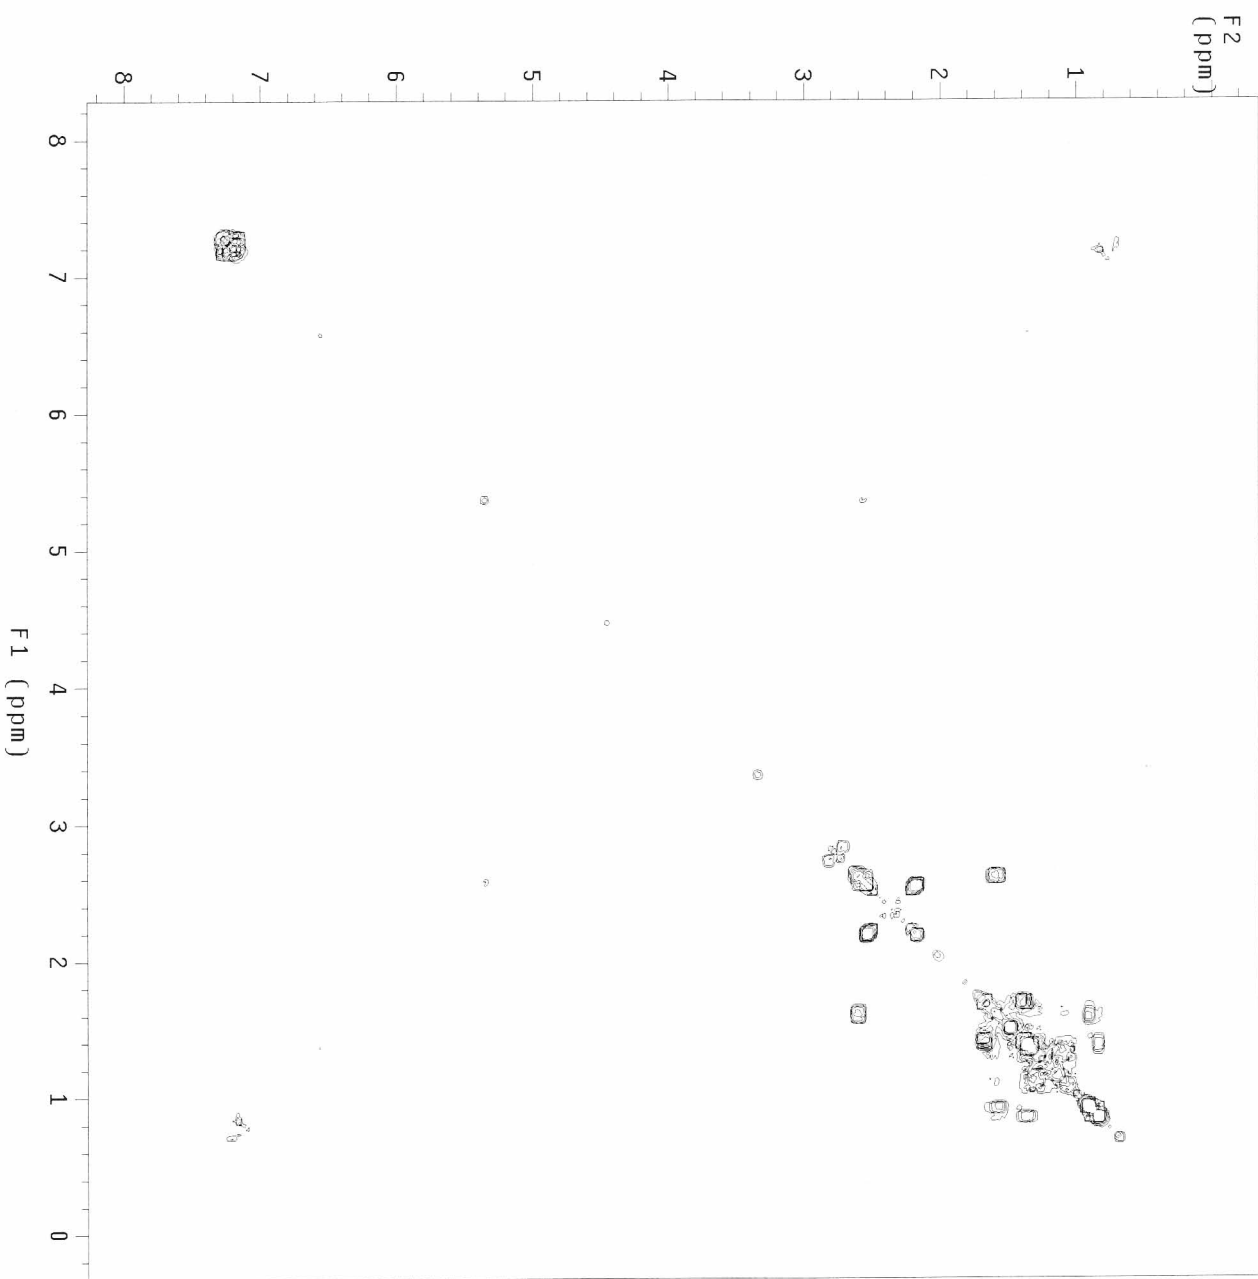



Figure S11: HSQC (CDCl3, 600 MHz)

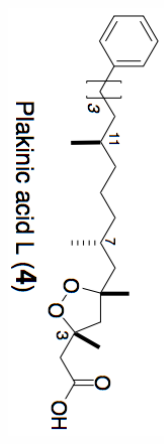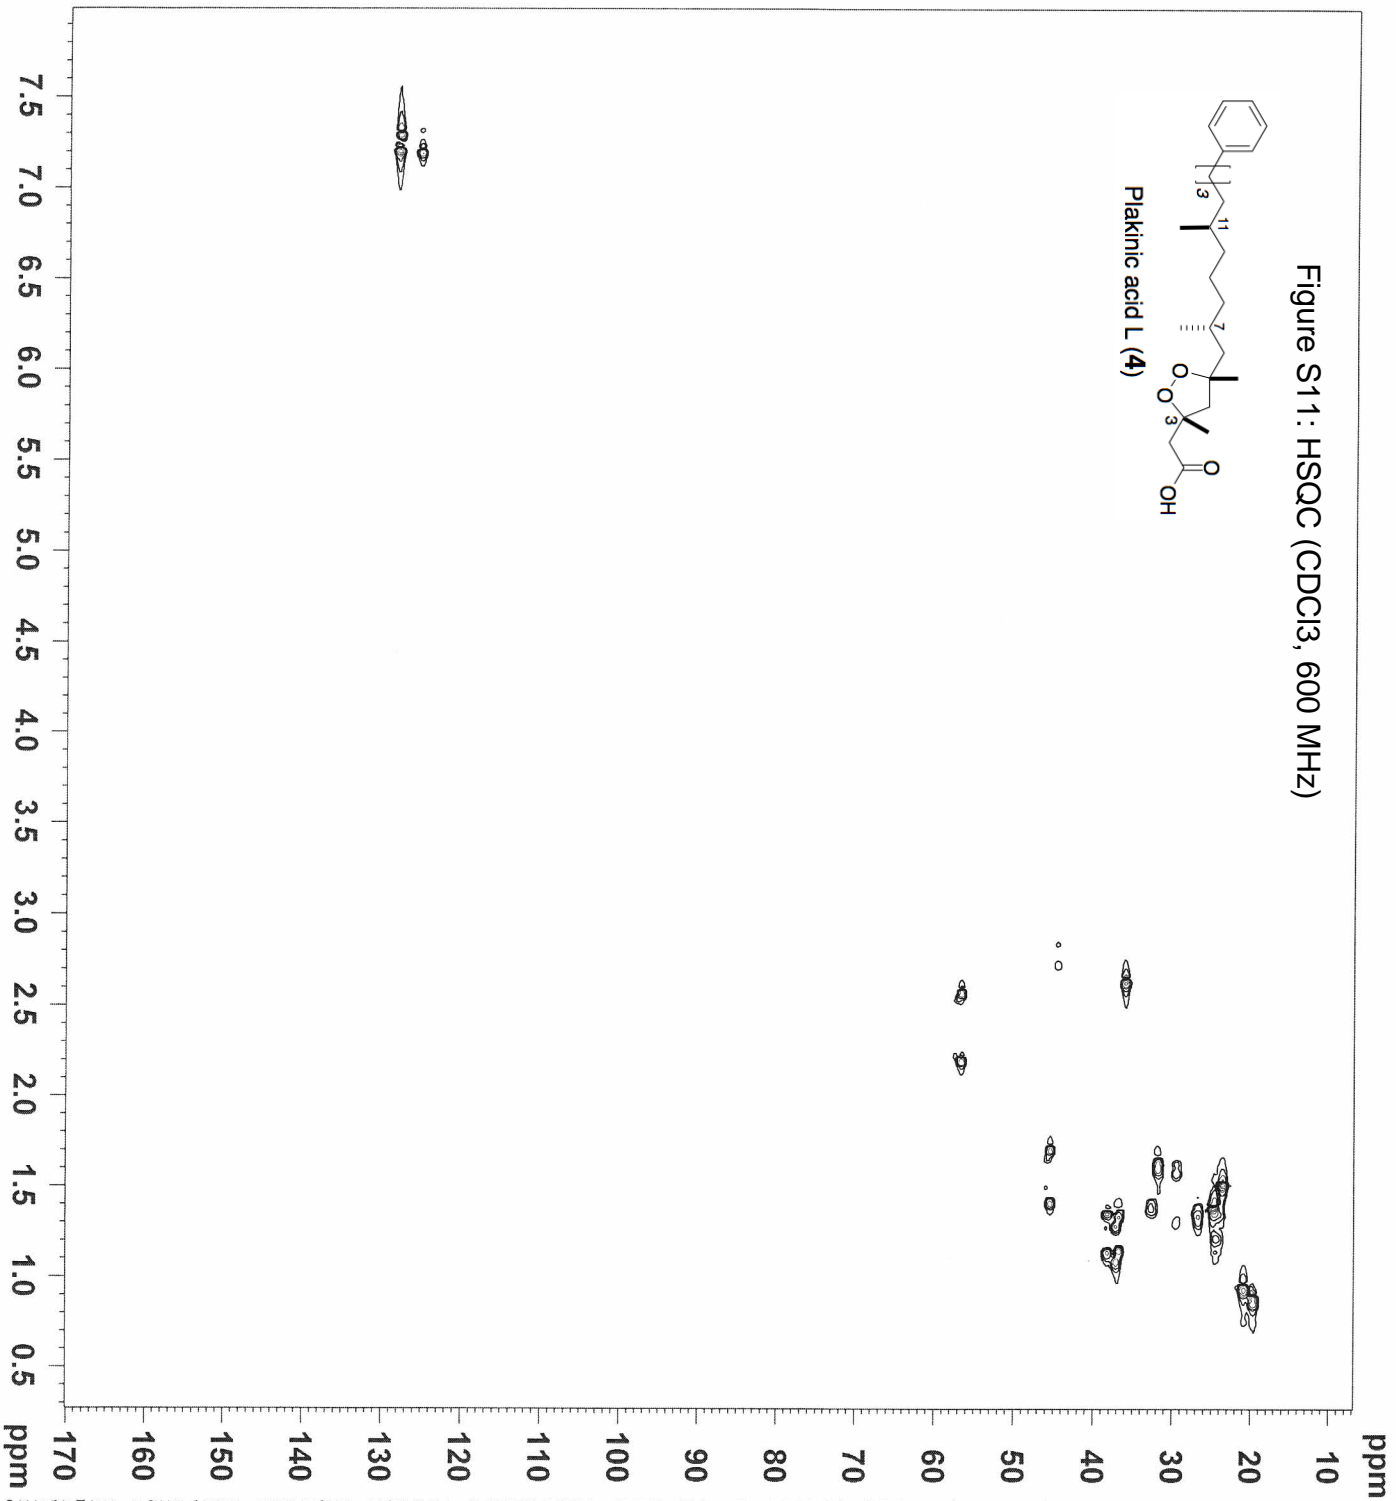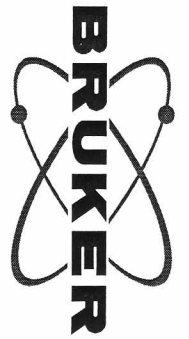

```

Current Data Parameters
NAME          0726171821214
EXPNO         3
PROCNO        1

F2 - Acquisition Parameters
File_         20090925
Time          18.52
INSTRUM       1.7 mm EPTXI 1
PROBHD        hsqcetpp
PULPROG       1024
TD            1024
SOLVENT       CDCl3
NS            32
DS            32
SFO1          500.132772 MHz
SFO2          125.761154 MHz
RG            4.922150 Hz
FIDRES        0.1016308 sec
AQ            2050
RG            99.200 usec
DE            6.50 usec
TE            296.0 K

===== CHANNEL F1 =====
NUC1           1H
P1            5.00 usec
P2            10.00 usec
P3            100.00 usec
P4            3.00 usec
SFO1          599.8224317 MHz

===== CHANNEL F2 =====
CPDPRG2       garp
NUC2           13C
P3            6.50 usec
P4            13.00 usec
P5            70.00 usec
P6            21.00 usec
P7            1.00 dB
P8            1.00 dB
SFO2          150.8391874 MHz

===== GRADIENT CHANNEL =====
GRNAM1        SINE.100
GRNAM2        SINE.100
GPR1          80.00 %
GPR2          20.10 %
GPR3          1000.00 usec

F1 - Acquisition parameters
ND0           2
TD            256
SFO1          150.8392 MHz
FIDRES        118.013596 Hz
SM            200.289 ppm
RMODE         Echo-Antiecho

F2 - Processing parameters
SI            1024
SF            599.8200000 MHz
WDW           QSINE
SSB           2
GB            0.00 Hz
DB            0
EC            1.40

F1 - Processing parameters
SI            1024
WDW           echo-antlecho
SSB           QSINE
GB            0.00 Hz
  
```

Figure S12: HMBC (CDCl3, 600 MHz)

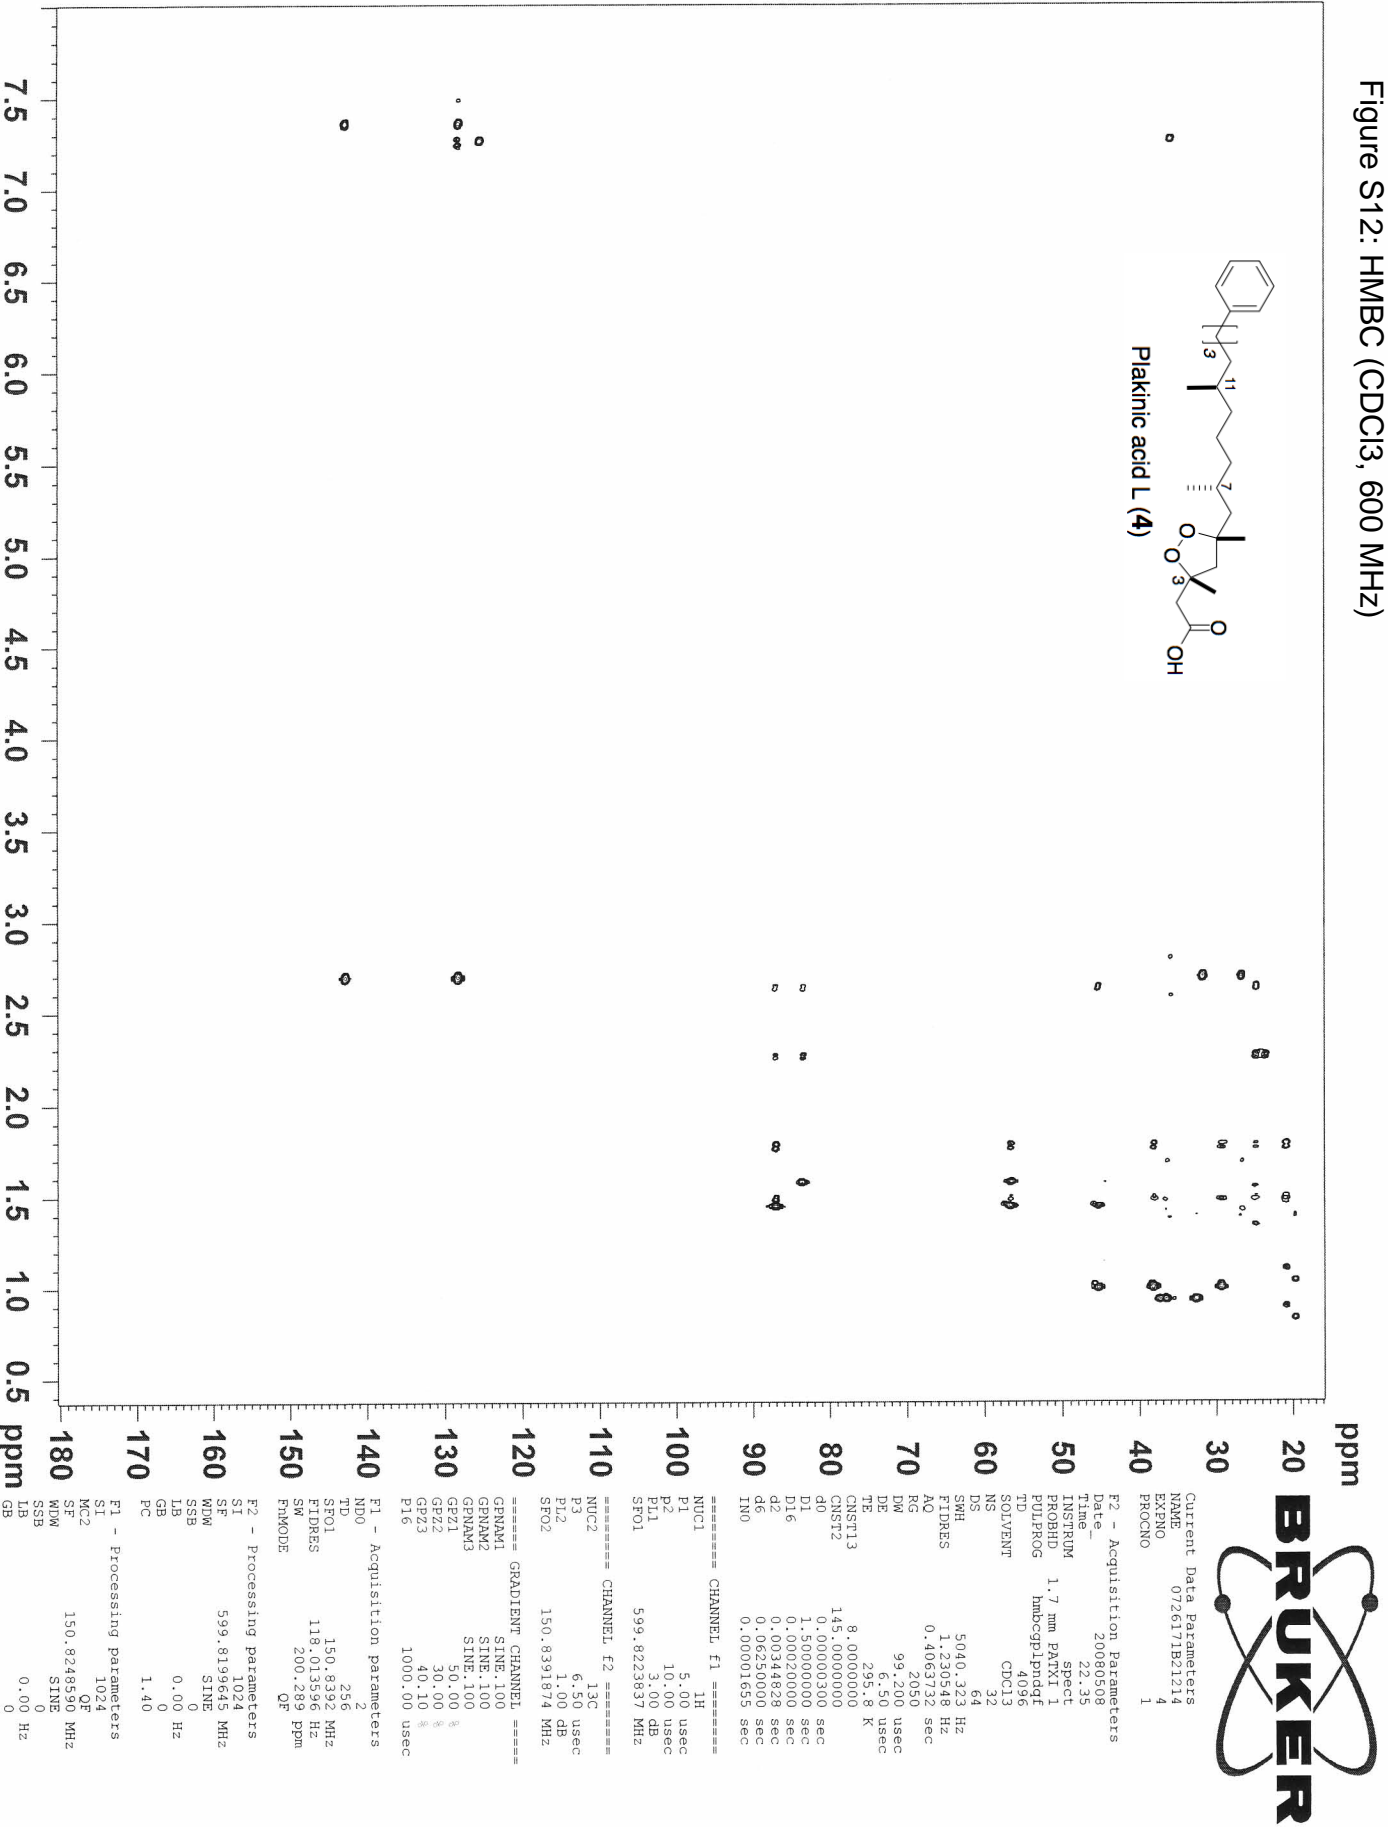

07.26.171.B.2.1.2.17  
 exp1 sta1h

```

SAMPLE      DEC. & VT
date Oct 2 2007   dfrq 400.056
solvent CDC13    dn    H1
file ACQUISITION exp    H1
sfrq 400.056    dpr  30
                dof   0
                dm   0
                dmf  nmh
                c    C
                200
at 1.993        dmf
np 23936        wtfile
sw 6006.0       proc
fb not used     ft
bs not used     fn
tpwr 16         not used
pw 57
d1 7.0          Weff
l1 1.000        Wexp
lof 0           wbs
nt 160         wnt
ct 80
a1ock n
gain not used
flags n
i1 n
in n
dp y

DISPLAY
sp -1031.8
wp 6005.6
vs 90
sc 0
wc 250
hzmm 2.30
fs 500.00
ftf 1032.2
lth 0
ins 20
nm cdc ph
  
```

Figure S13: <sup>1</sup>H NMR (CDCl<sub>3</sub>, 400 MHz)

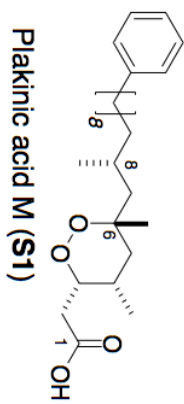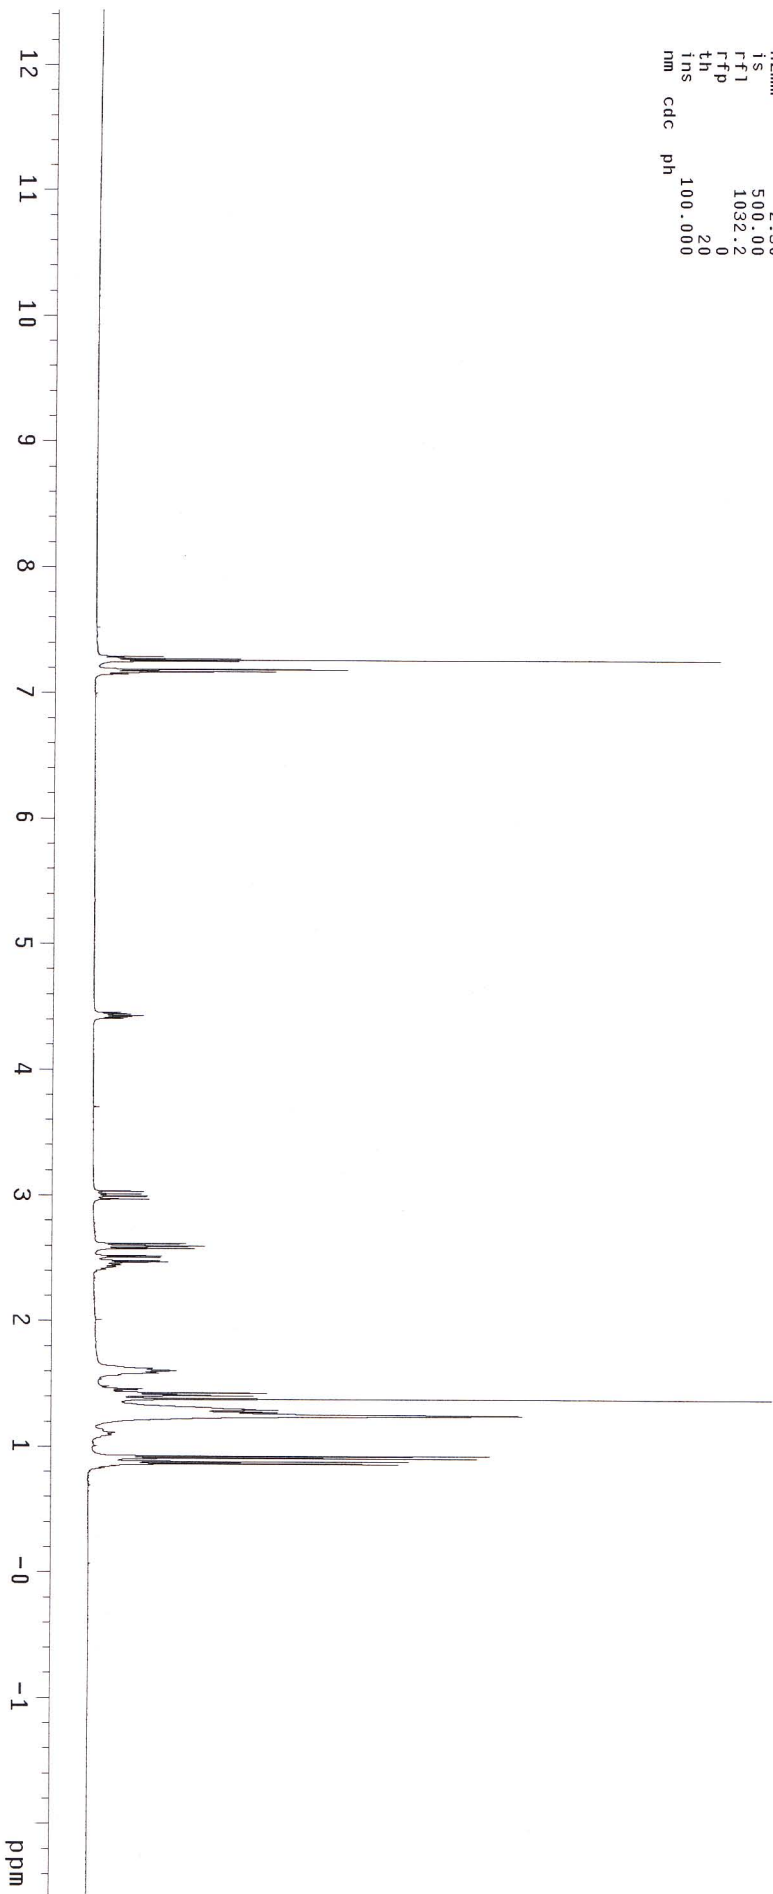

07.26.171.B.2.1.2.17.13C  
 expl std13c

Figure S14: <sup>13</sup>C NMR (CDCl<sub>3</sub>, 100 MHz)

SAMPLE 7 2007 dfreq 399.911  
 date Oct 7 2007 dfreq 399.911  
 solvent CDCl<sub>3</sub> dn H1  
 file /export/home/~ molninski/dda1tsay/~ dpr 38  
 07.26.171.B.2.1.2.~ dm 0  
 17.13C.fid dnm yyy  
 17.13C.fid dnm w  
 9700  
 ACQUISITION dmf 9700  
 sffrq 100.567 PROCESSING 5.00  
 tn C13 lb wtfile  
 at 1.500 proc ft  
 np 75000 fn not used  
 sw 25000.0  
 fb 13800  
 bs 16 weff  
 ss 4 wexp  
 tpwr 58 wbs  
 pw 6.5 wnt  
 dl 2.000  
 tof 10000  
 nt 1408  
 ct 1408  
 alock n  
 gain not used  
 flags not used  
 i1 n  
 in n  
 dp y

DISPLAY  
 sp -2986.2  
 wp 24999.6  
 vs 874  
 sc 0  
 wc 250  
 hzmm 4.98  
 is 500.00  
 ffl 10745.6  
 rfp 7759.0  
 th 20  
 ins 100.000  
 nm no ph

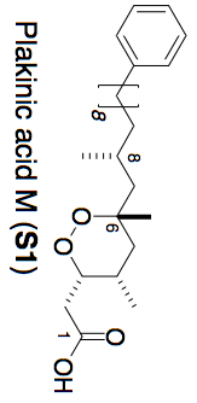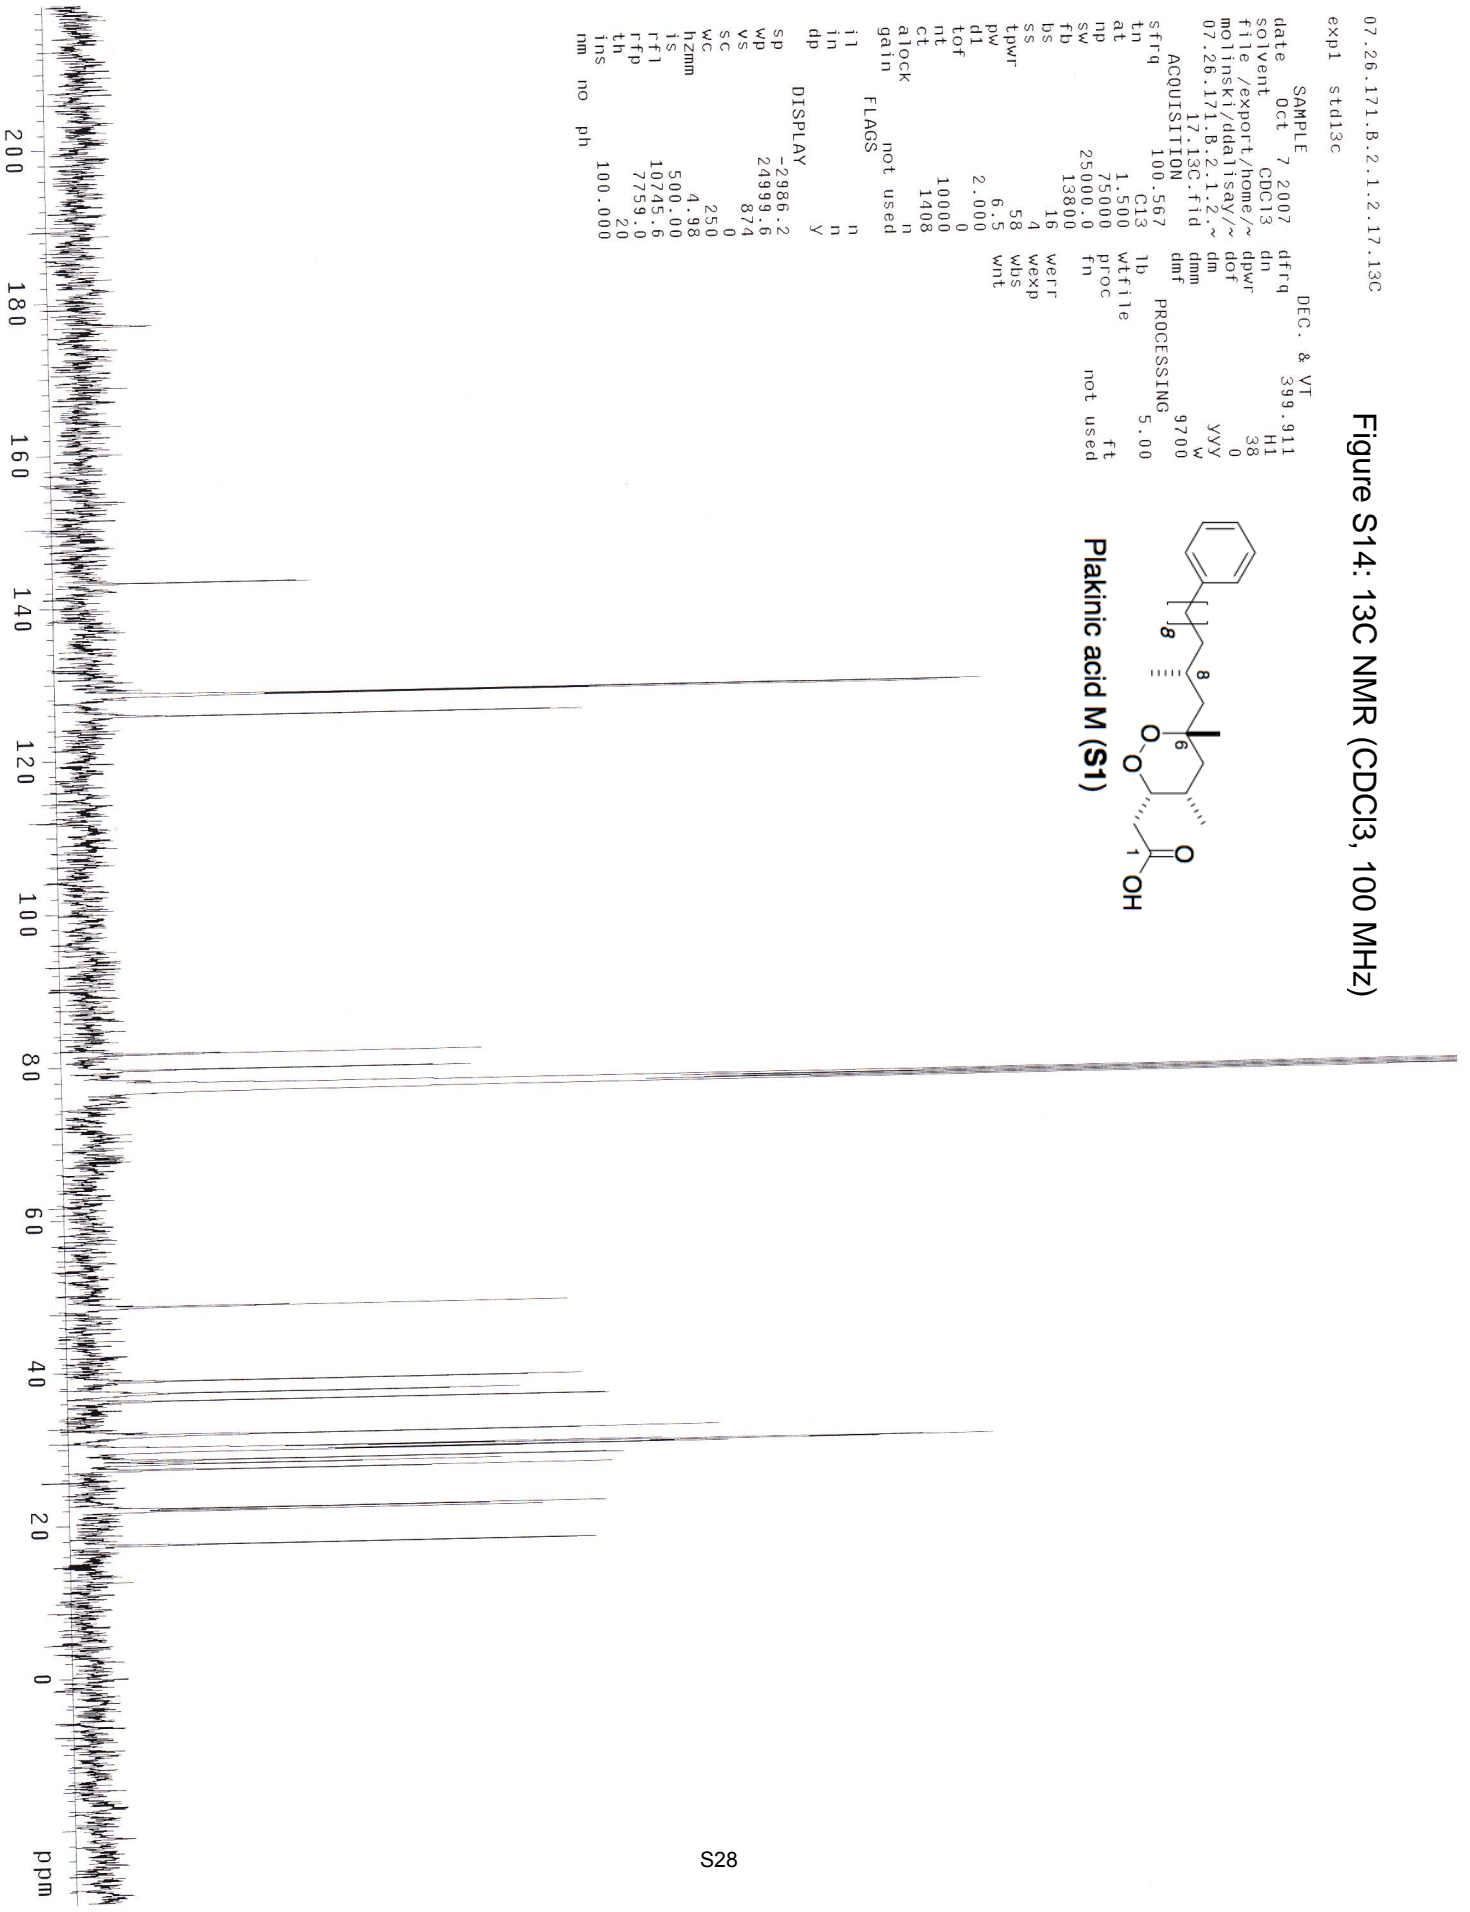

07.26.17.1.B.2.1.2.17.gCOSY  
 expt1 gCOSY

| SAMPLE         | date      | hs            | nm       |
|----------------|-----------|---------------|----------|
| Oct 7 2007     | hs        | nm            |          |
| solvent        | CDCl3     | ssnu1         | n        |
| sample         | undefined | hs9lv1        | 994      |
| ACQUISITION    |           | SPECIAL       |          |
| sw             | 4132.2    | temp          | not used |
| at             | 0.248     | gain          | 20       |
| np             | 2048      | spin          | 0        |
| fb             | not used  | F2 PROCESSING |          |
| ss             | 16        | sb            | -0.124   |
| d1             | 1.000     | sbs           | not used |
| nt             | 8         | fn            | 2048     |
| 2D ACQUISITION |           | F1 PROCESSING |          |
| sw1            | 4132.2    | sb1           | -0.031   |
| n1             | 128       | sbs1          | not used |
| TRANSMITTER    |           | proc1         | 1p       |
| tn             | H1        | fn1           | 2048     |
| sfrq           | 399.911   | sp            | DISPLAY  |
| tof            | -329.9    | wp            | -366.3   |
| tpwr           | 55        | wp1           | 4128.2   |
| pw             | 13.900    | sp1           | -364.6   |
| GRADIENTS      |           | wp1           | 4128.2   |
| gz1v11         | 994       | rft1          | 370.4    |
| gt1            | 0.001000  | rffp          | 0        |
| gstab          | 0.000500  | rff11         | 368.7    |
| DECOUPLER      |           | rfp1          | 0        |
| dm             | H1        | PLOT          |          |
|                | nmn       | wc            | 155.0    |
|                |           | sc            | 10.0     |
|                |           | wc2           | 155.0    |
|                |           | sc2           | 0        |
|                |           | vs            | 113      |
|                |           | th            | 7        |
|                |           | ai            | cdc av   |

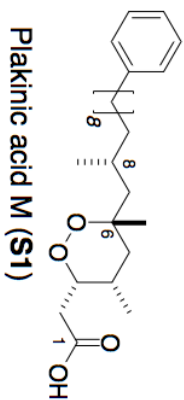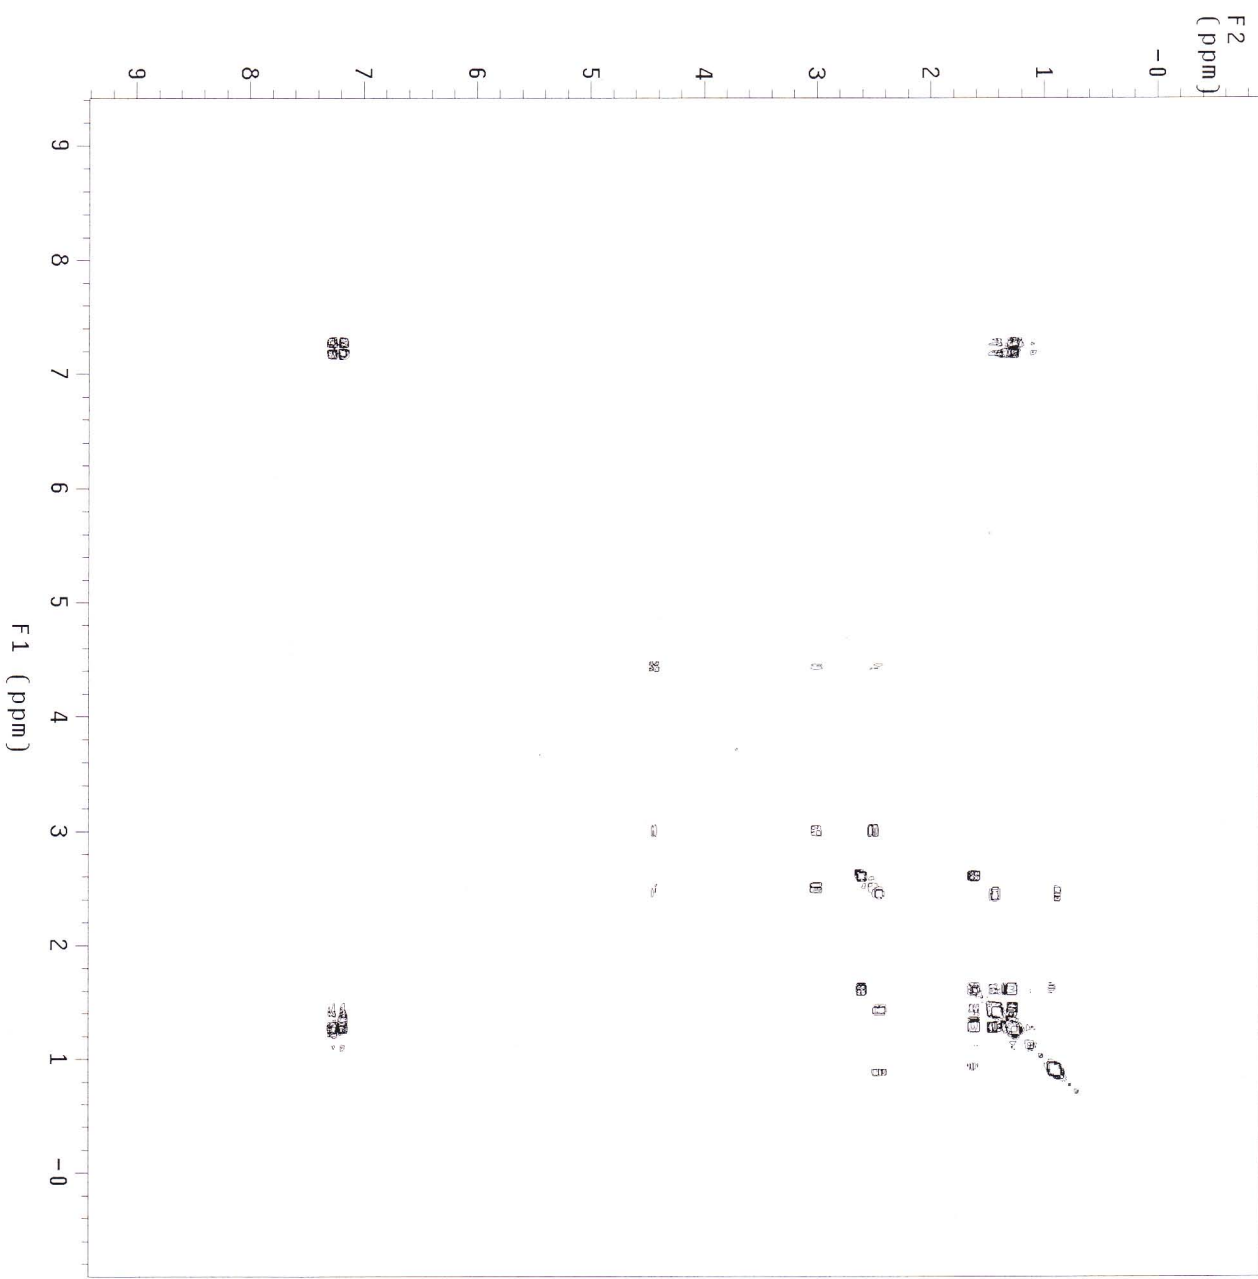

Figure S15: COSY (CDCl3, 400 MHz)

**Figure S16:** <sup>1</sup>H NMR spectrum of enyne **12** (400 MHz, CDCl<sub>3</sub>).

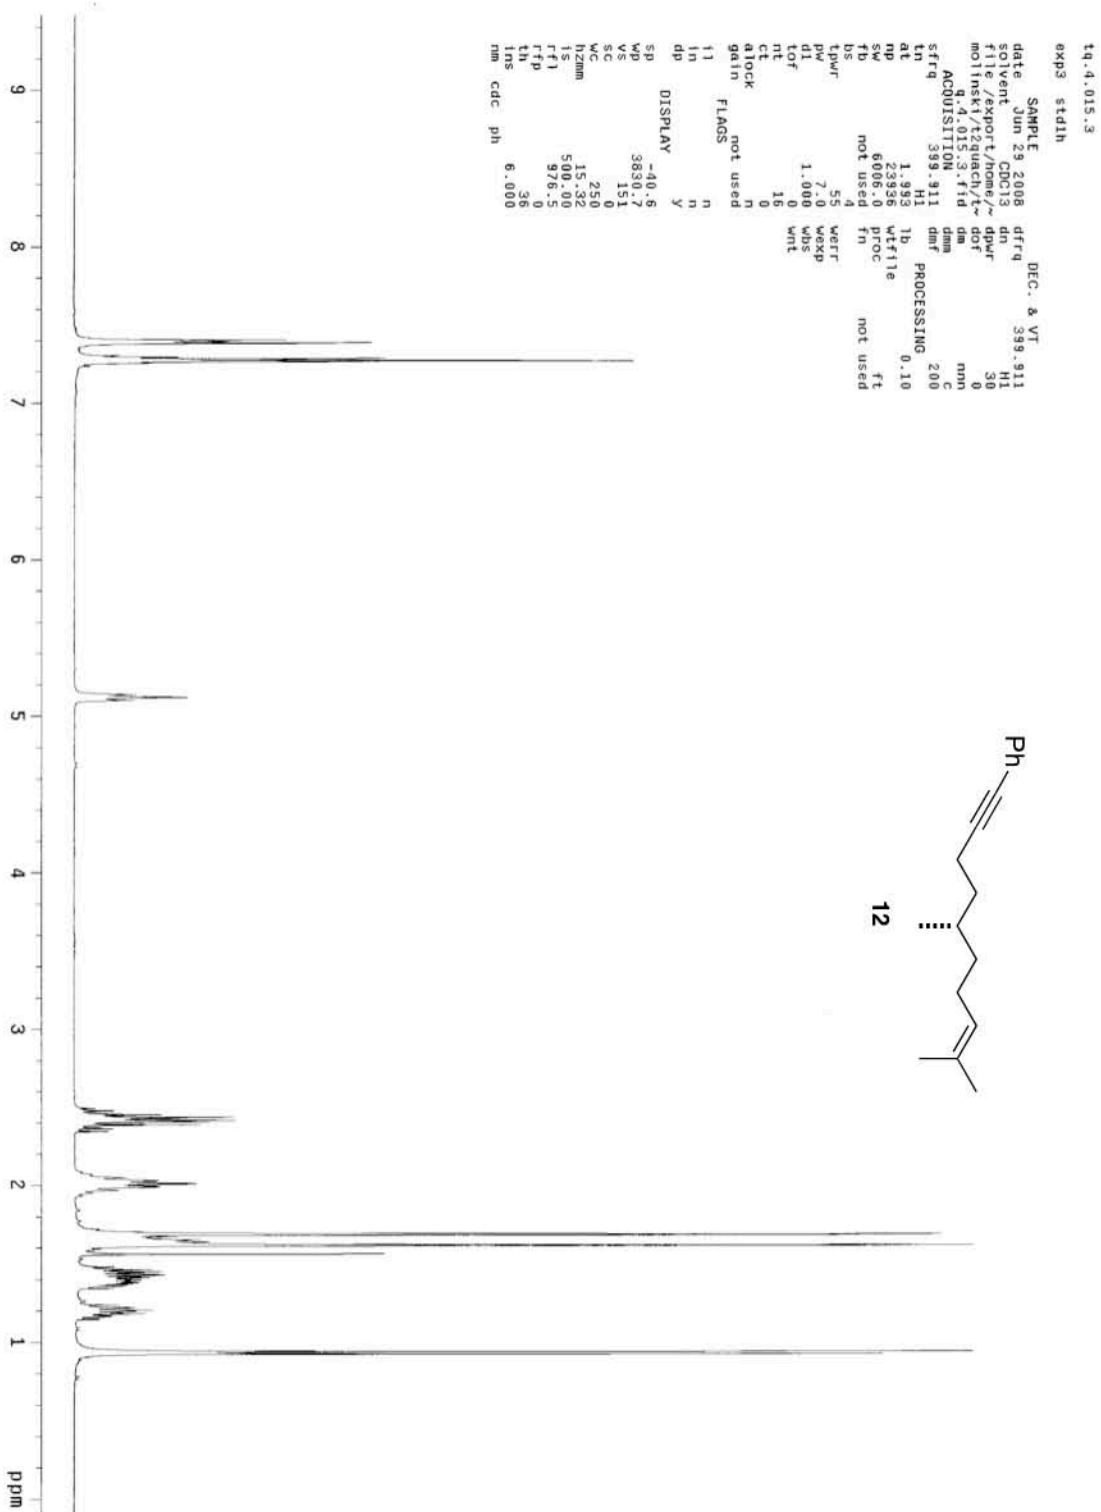

**Figure S17:**  $^{13}\text{C}$  NMR spectrum of enyne **12** (100 MHz,  $\text{CDCl}_3$ ).

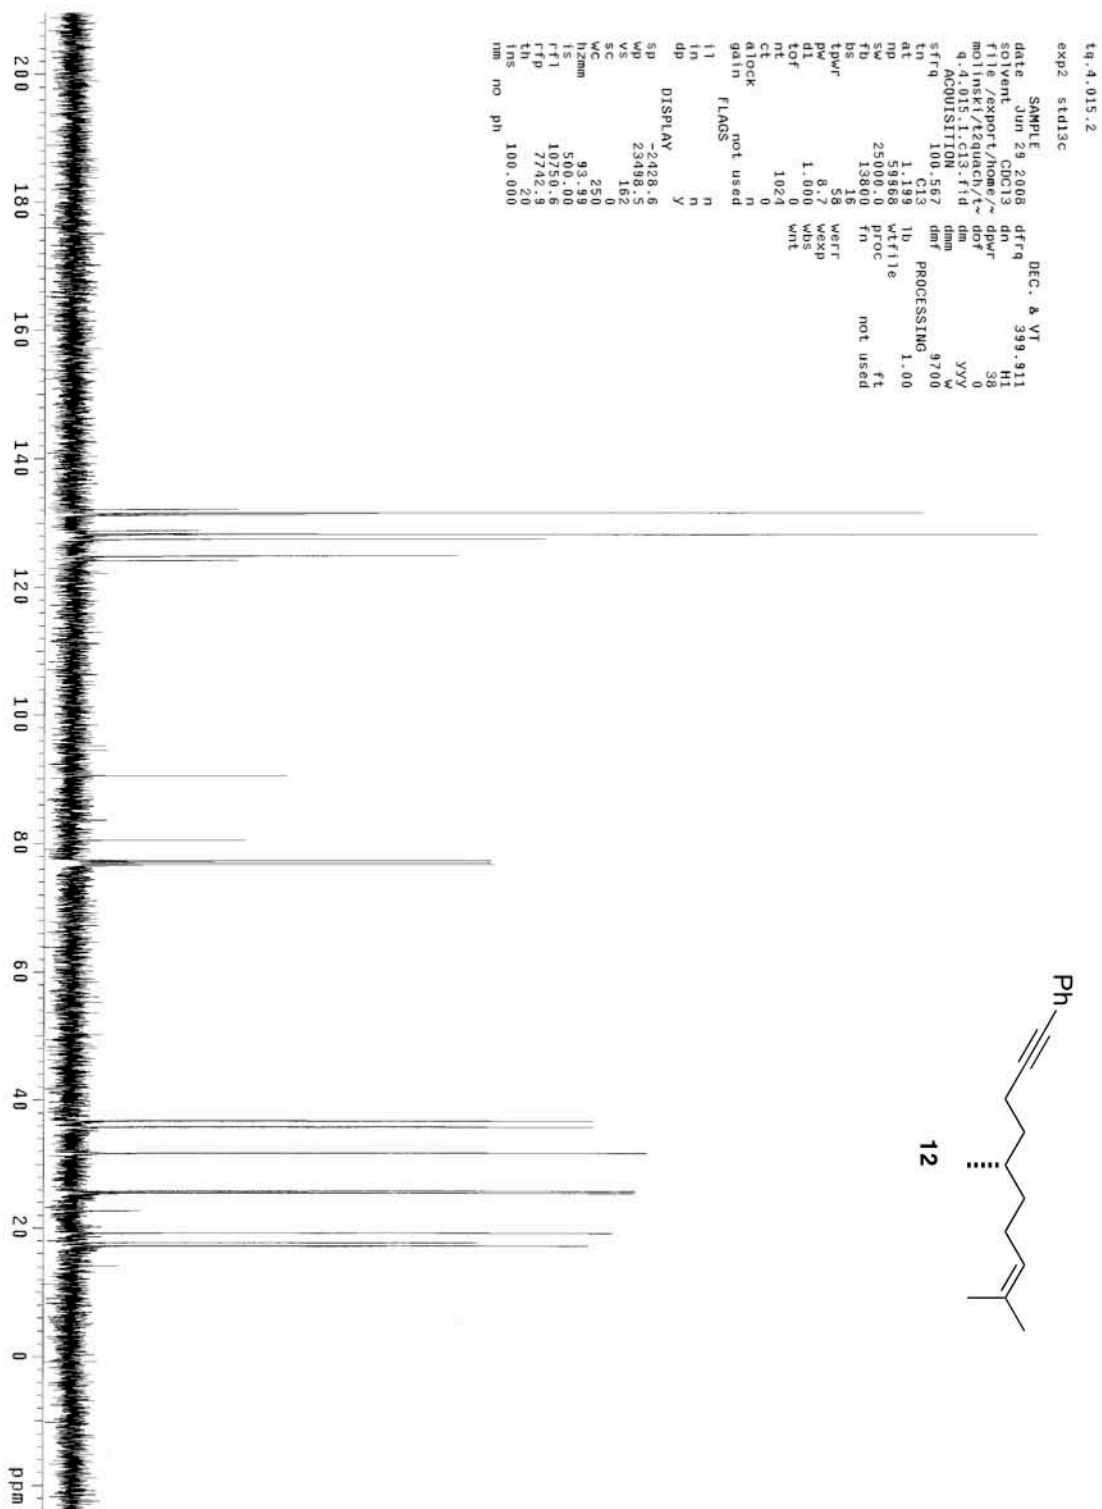

**Figure S18:**  $^1\text{H}$  NMR spectrum of diol **13** (400 MHz,  $\text{CDCl}_3$ ).

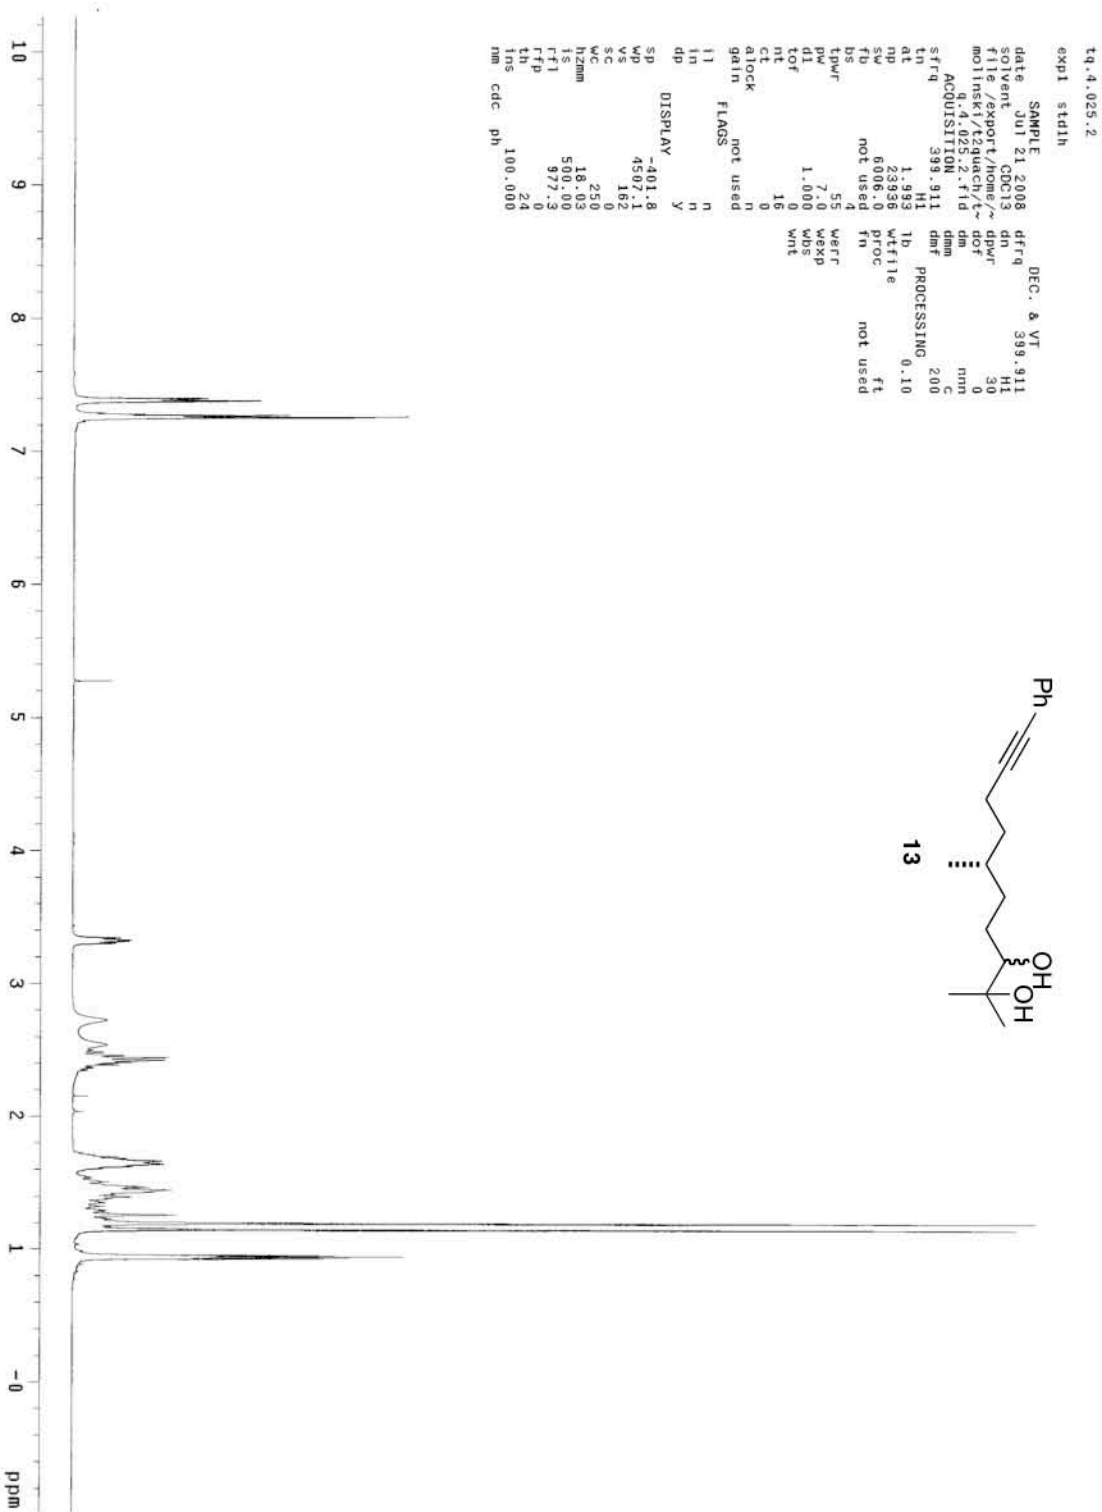



**Figure S19:**  $^{13}\text{C}$  NMR spectrum of diol **13** (100 MHz,  $\text{CDCl}_3$ ).

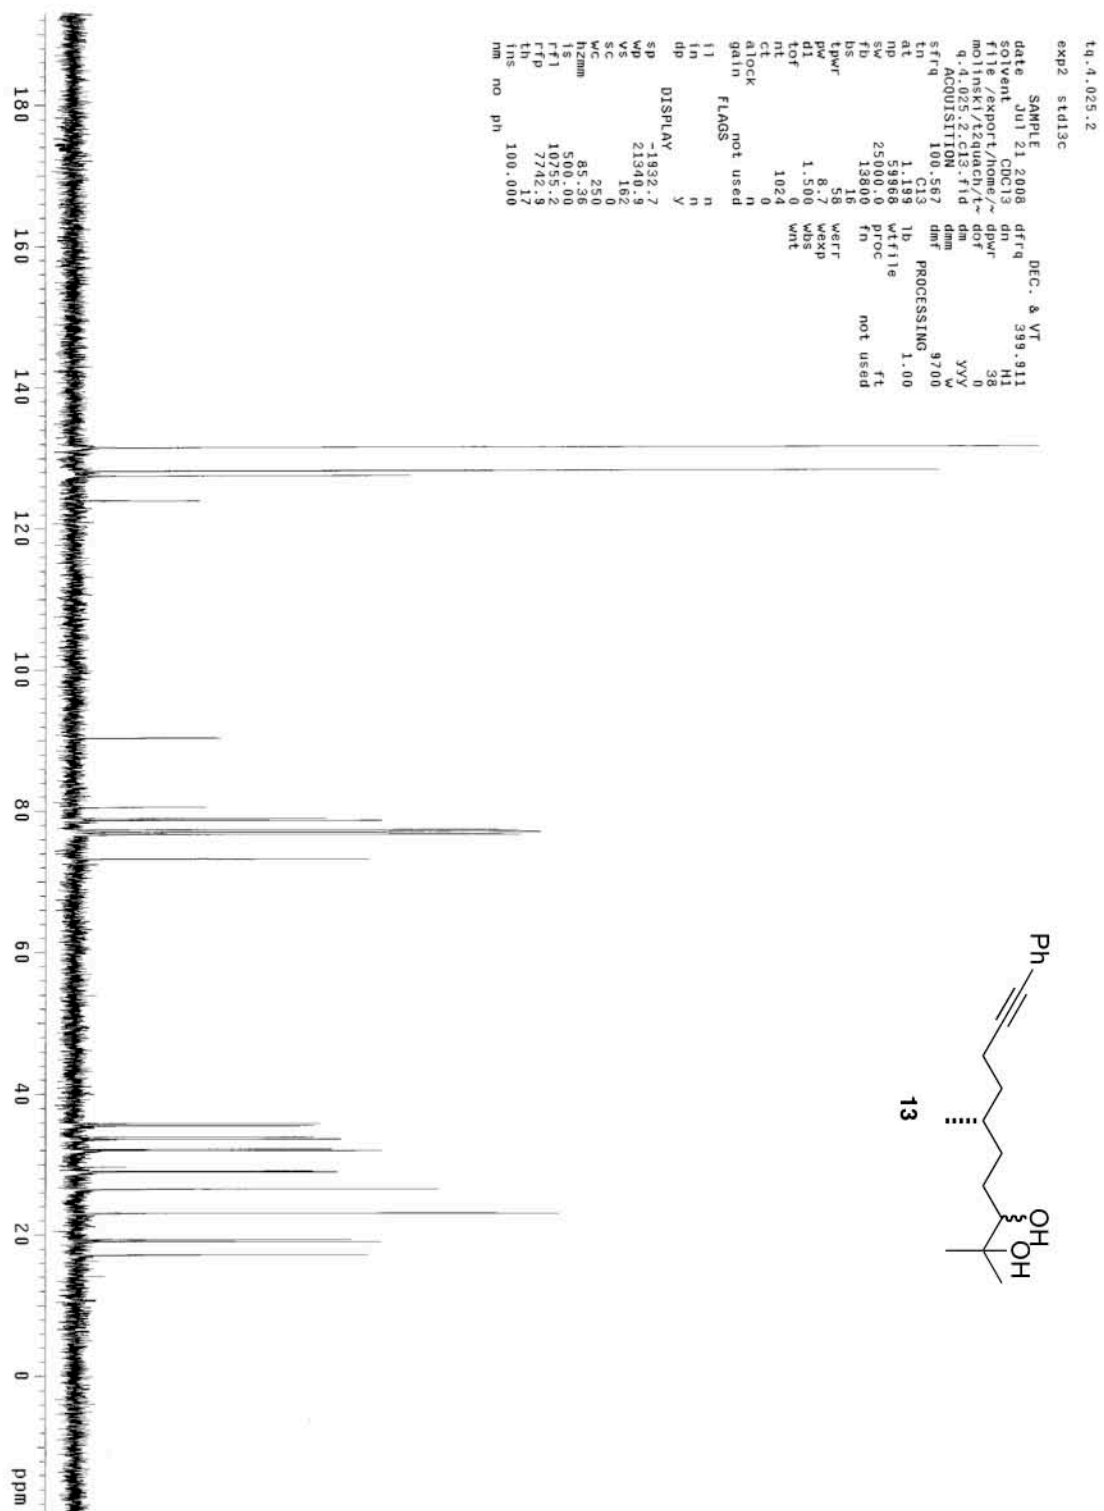

**Figure S20:**  $^1\text{H}$  NMR spectrum of aldehyde **14** (400 MHz,  $\text{CDCl}_3$ ).

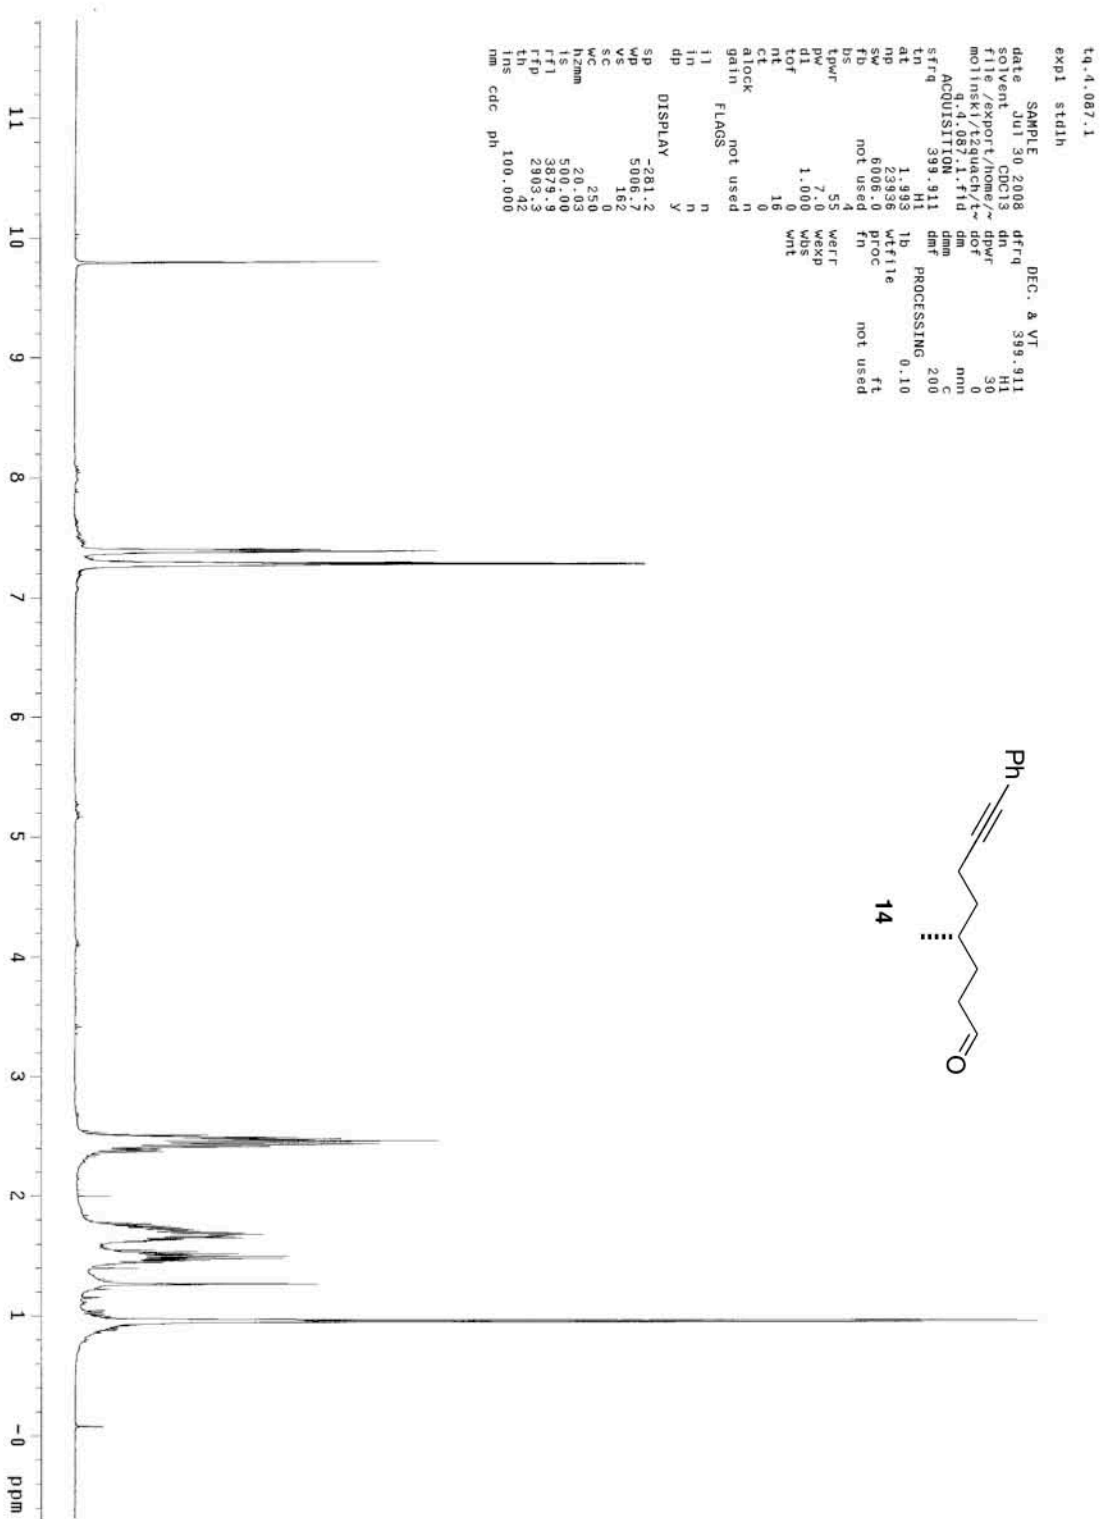

**Figure S21:**  $^{13}\text{C}$  NMR spectrum of aldehyde **14** (100 MHz,  $\text{CDCl}_3$ ).

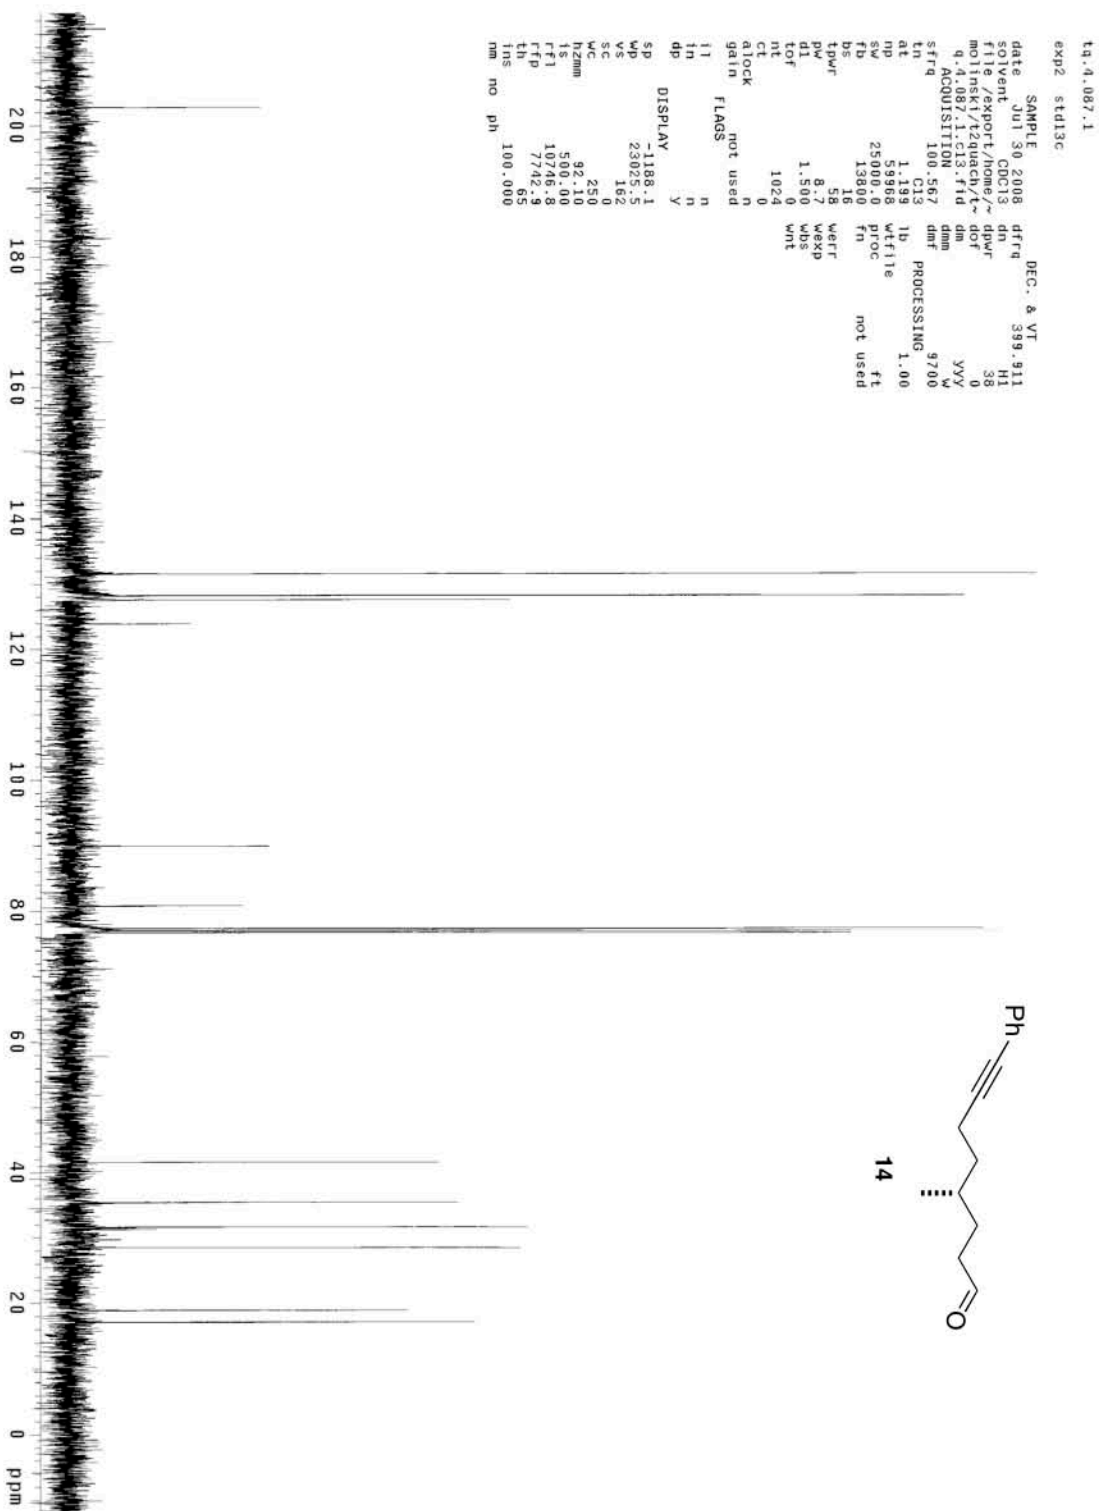

**Figure S22:**  $^1\text{H}$  NMR spectrum of unsaturated ester **15** (400 MHz,  $\text{CDCl}_3$ ).

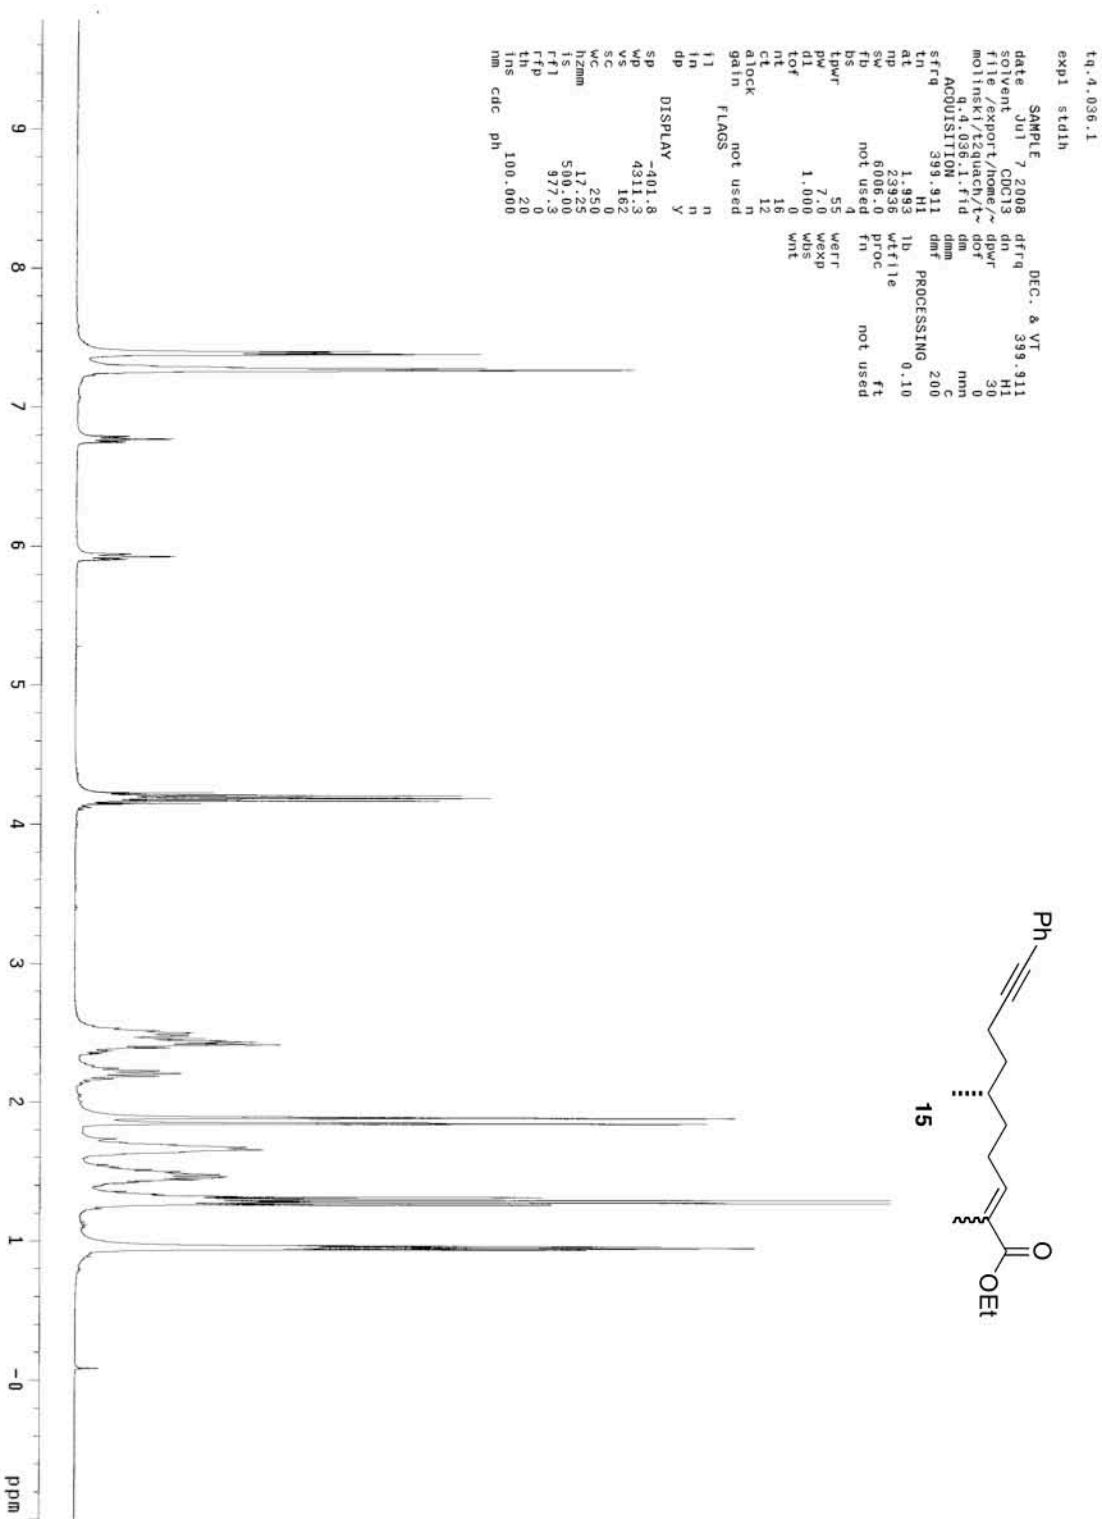

**Figure S23:**  $^{13}\text{C}$  NMR spectrum of unsaturated ester **15** (100 MHz,  $\text{CDCl}_3$ ).

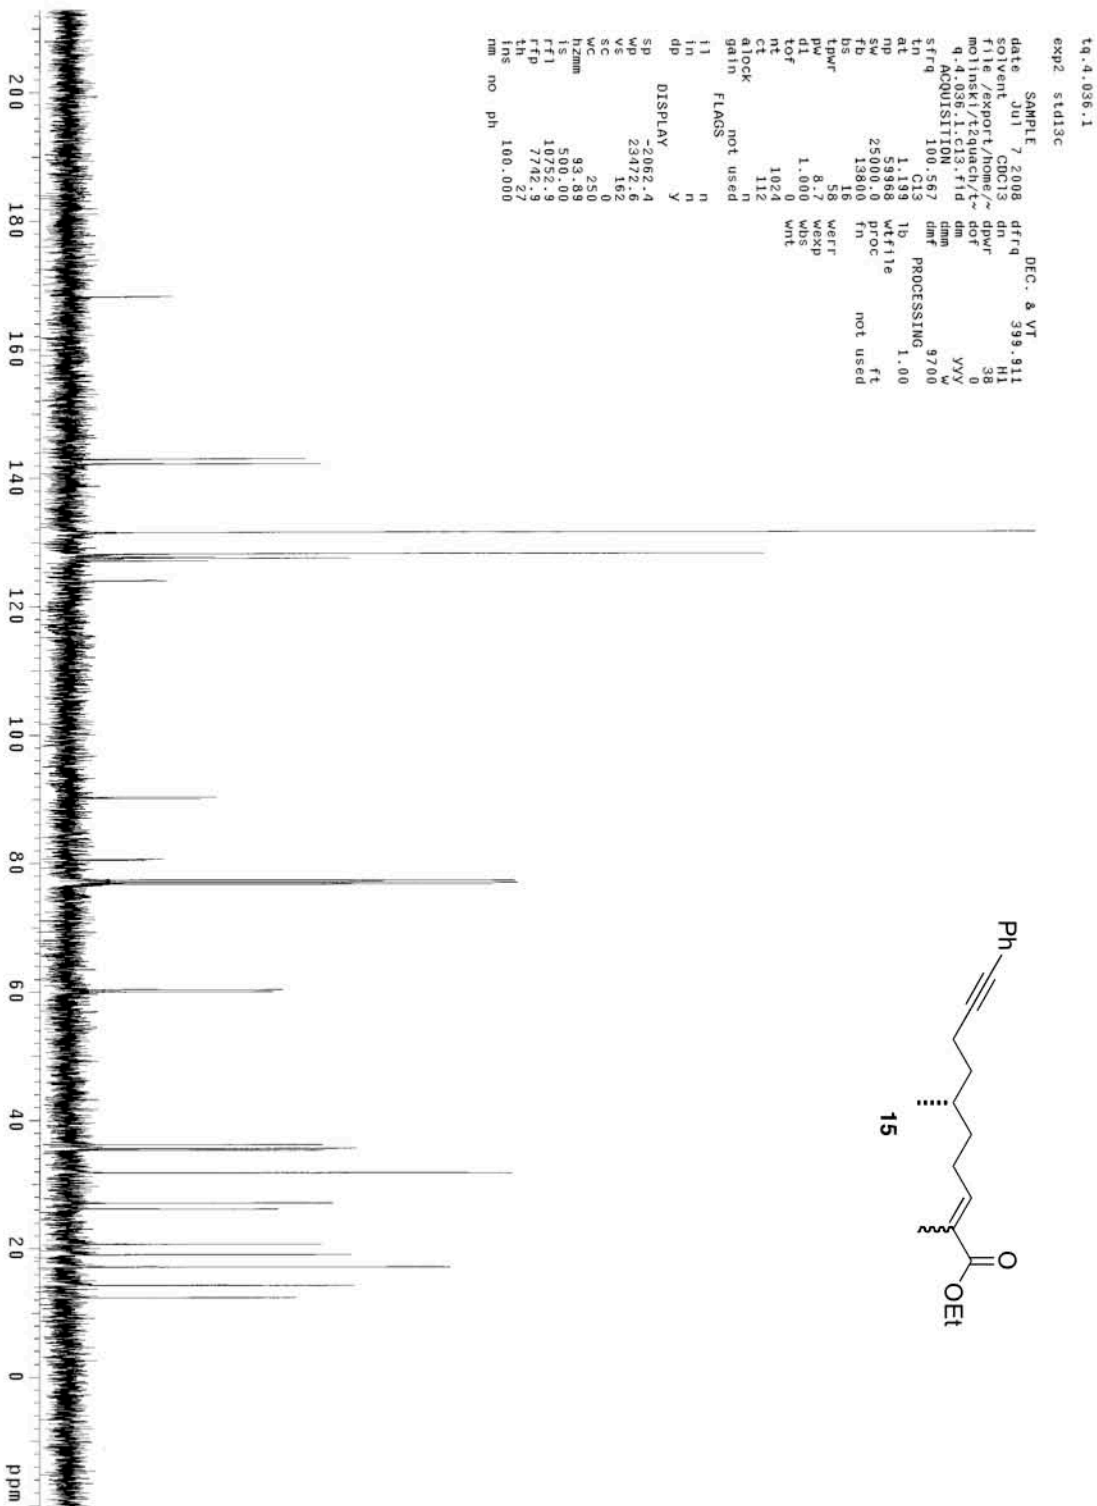

**Figure S24:**  $^1\text{H}$  NMR spectrum of saturated ester **16** (400 MHz,  $\text{CDCl}_3$ ).

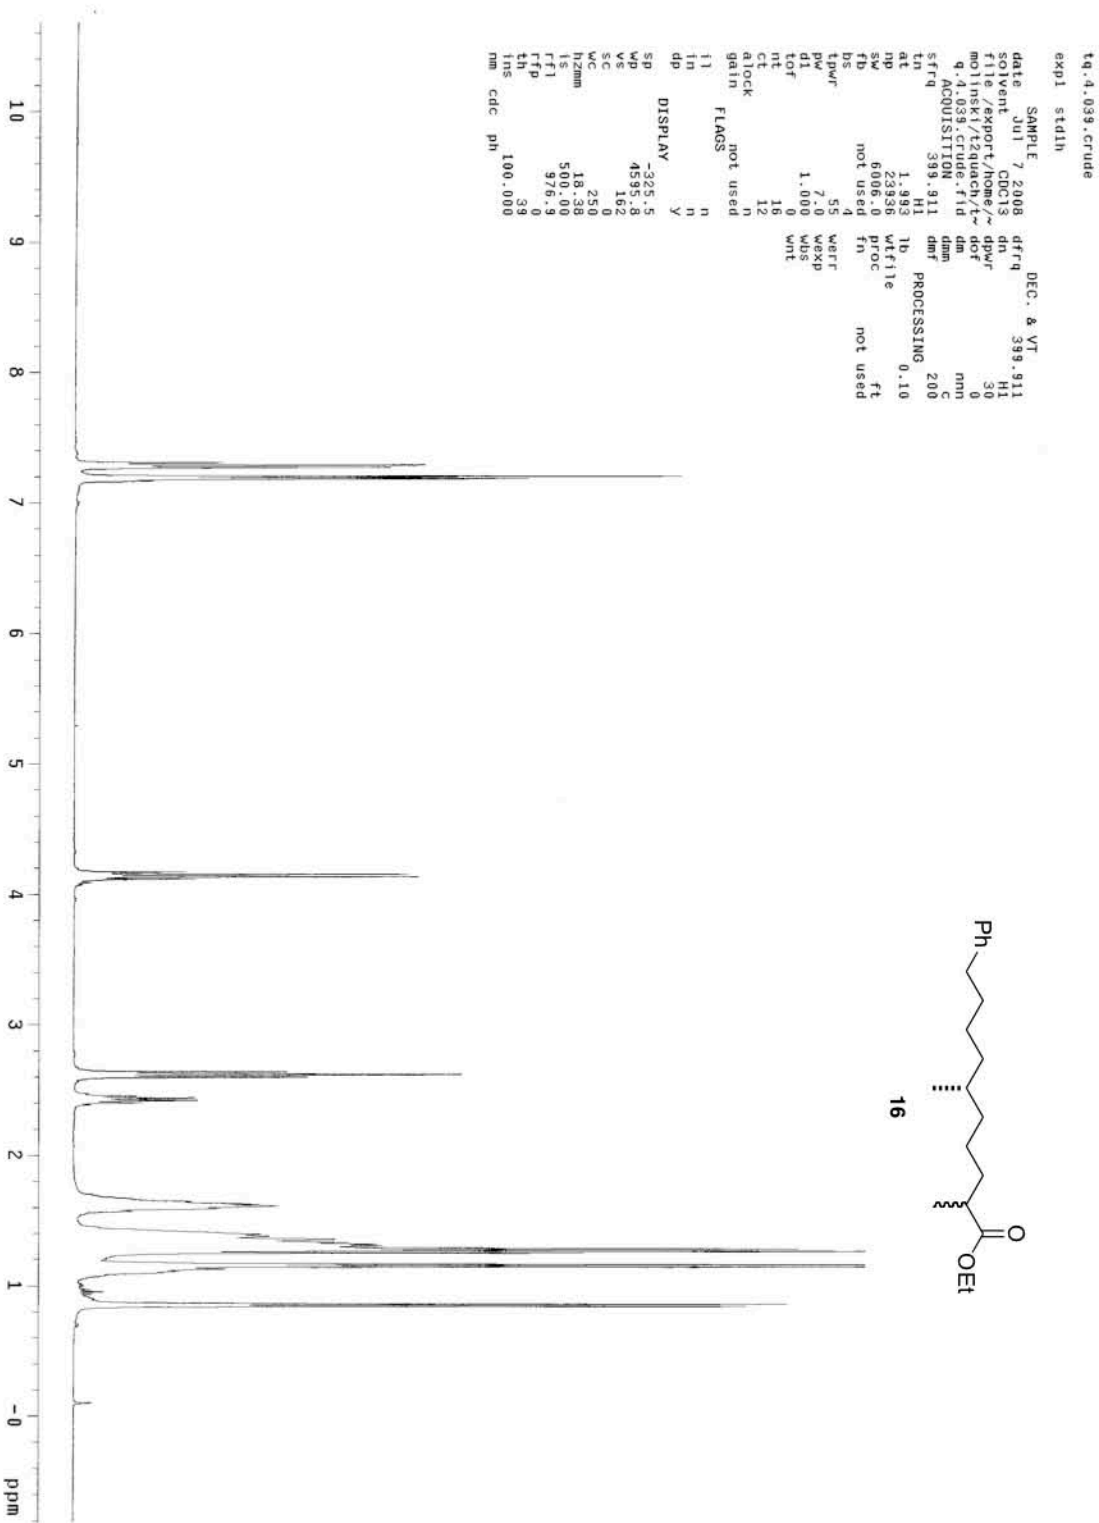

**Figure S25:**  $^{13}\text{C}$  NMR spectrum of saturated ester **16** (100 MHz,  $\text{CDCl}_3$ ).

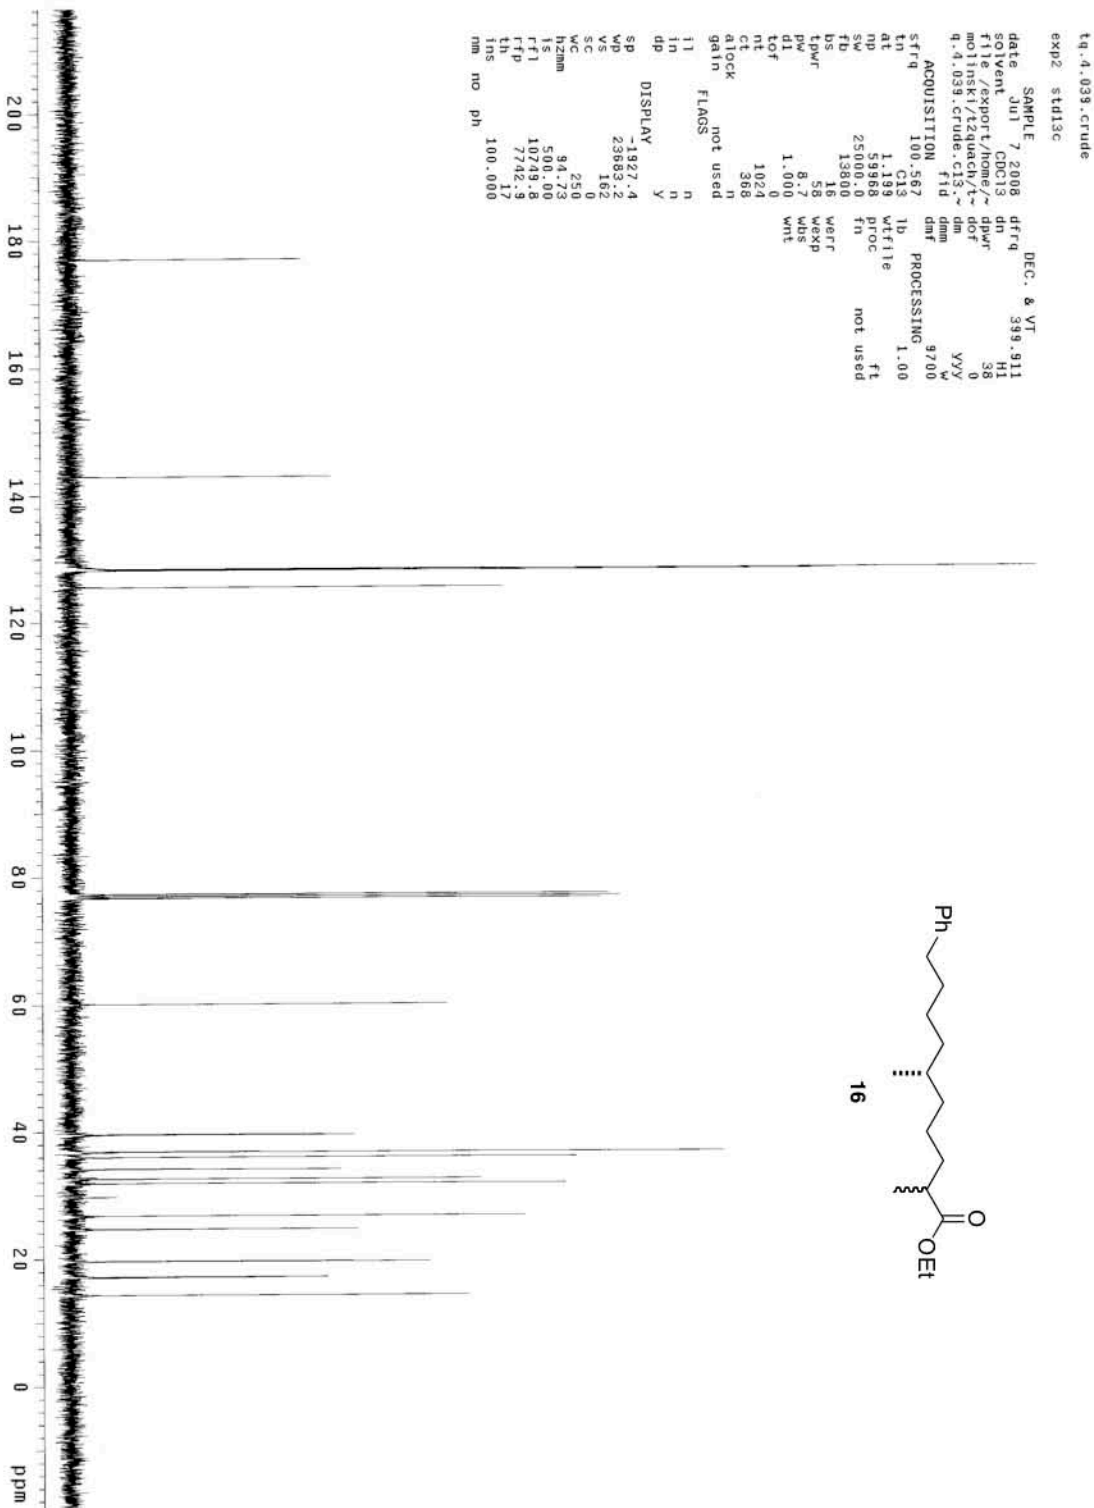

**Figure S26:** <sup>1</sup>H NMR spectrum of acid **17** (400 MHz, CDCl<sub>3</sub>).

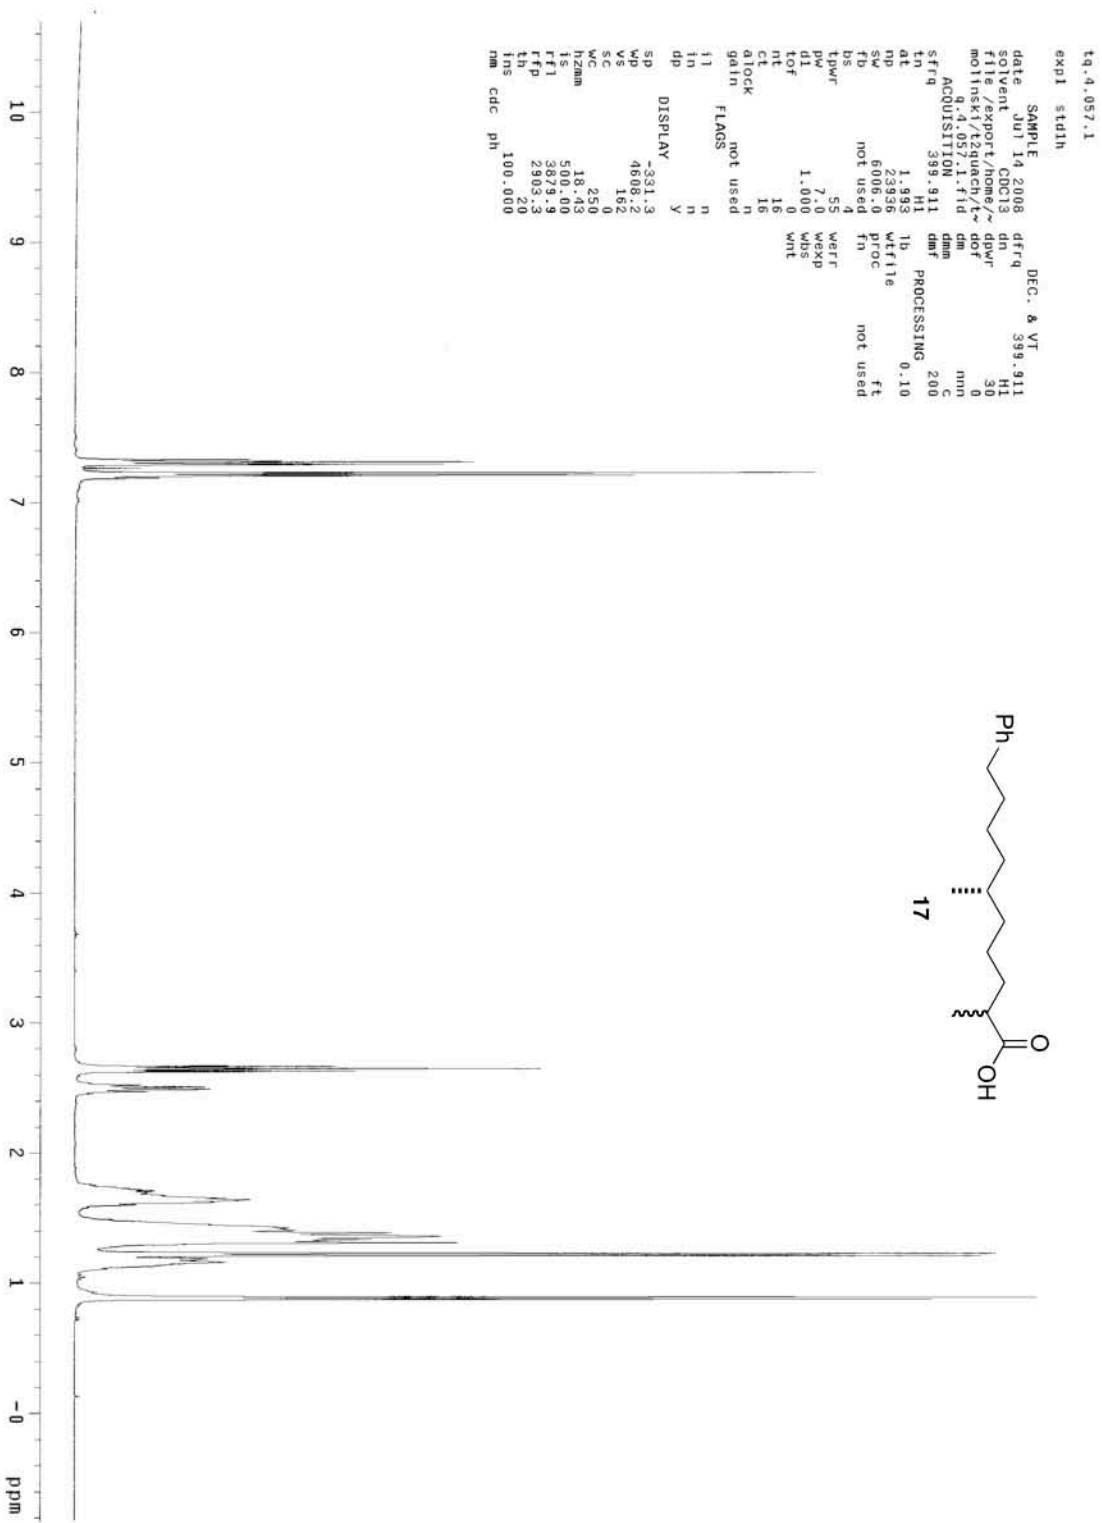



Figure S27:  $^{13}\text{C}$  NMR spectrum of acid **17** (100 MHz,  $\text{CDCl}_3$ ).

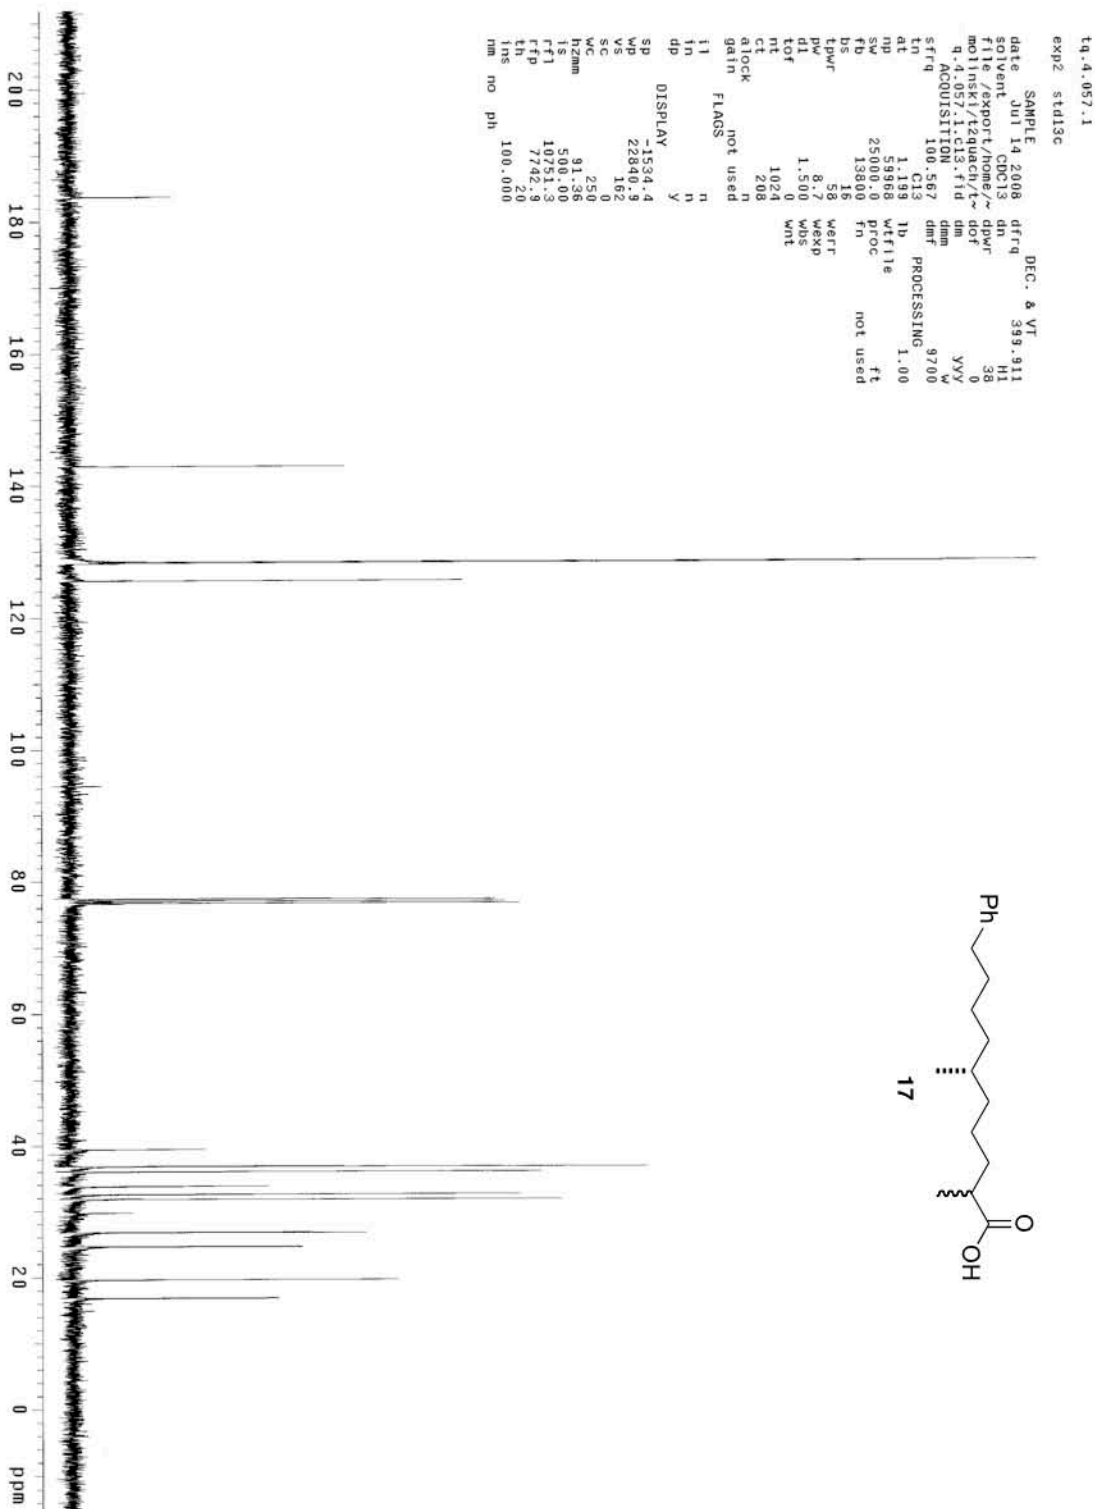

**Figure S28:** <sup>1</sup>H NMR spectrum of amide (2*S*,6*R*)-**18** (400 MHz, CDCl<sub>3</sub>).

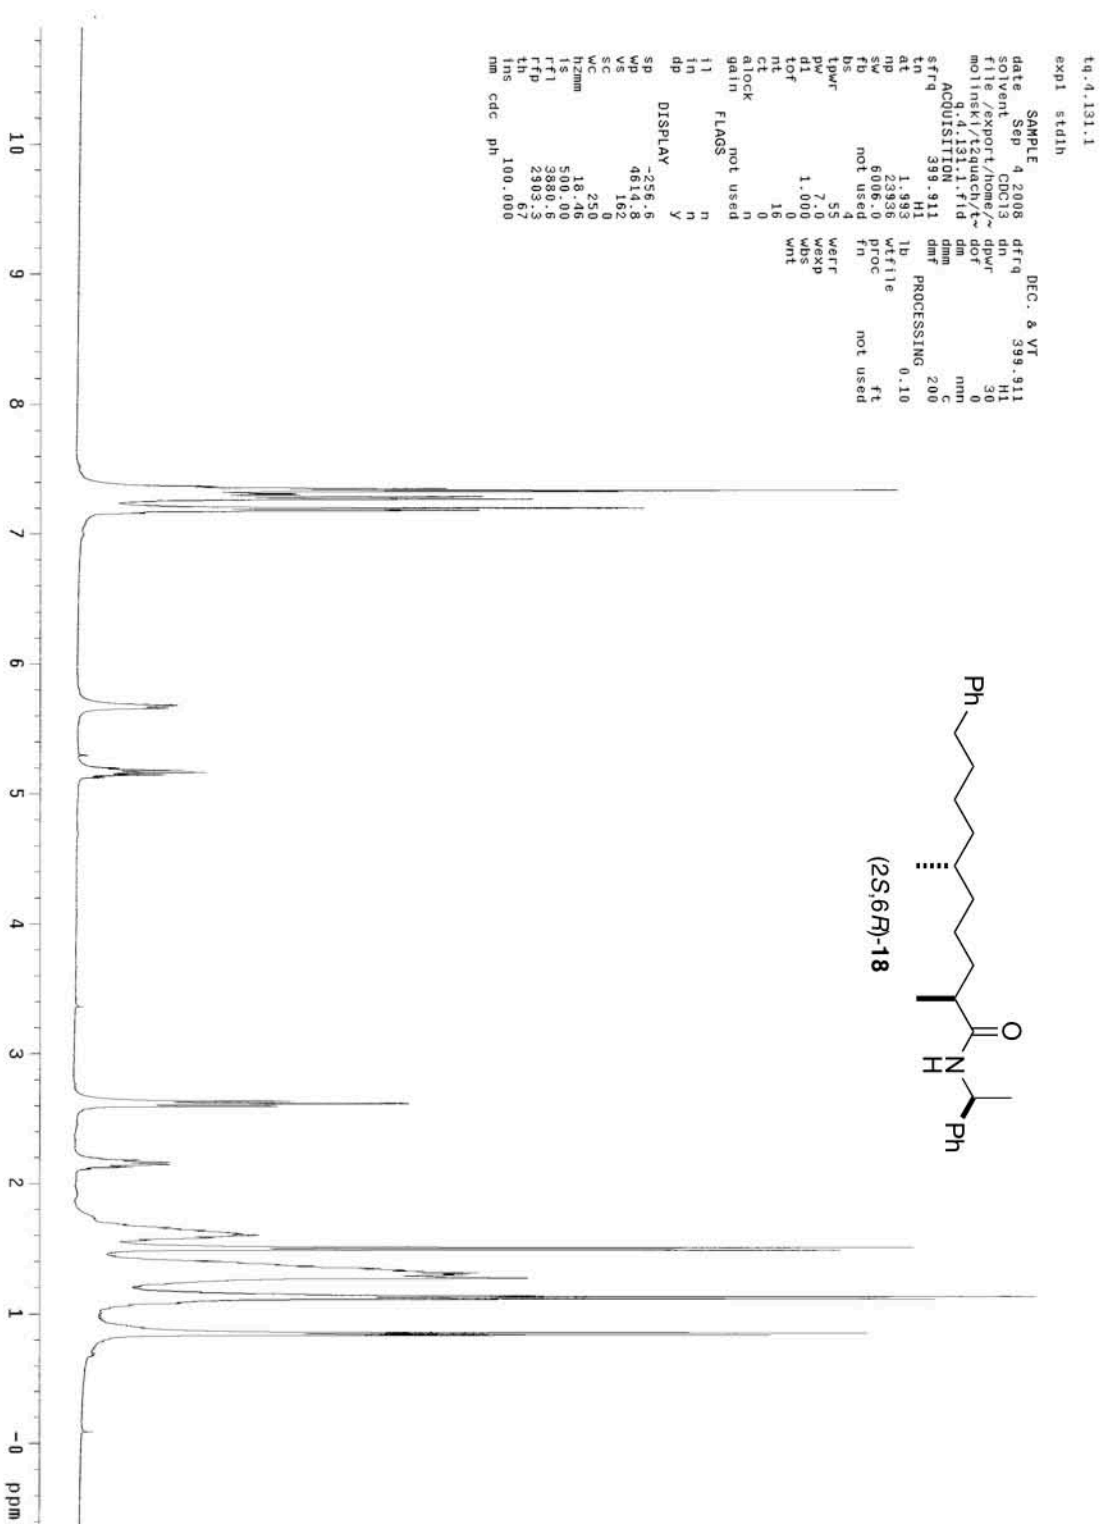

**Figure S29:**  $^{13}\text{C}$  NMR spectrum of amide (2*S*,6*R*)-**18** (100 MHz,  $\text{CDCl}_3$ ).

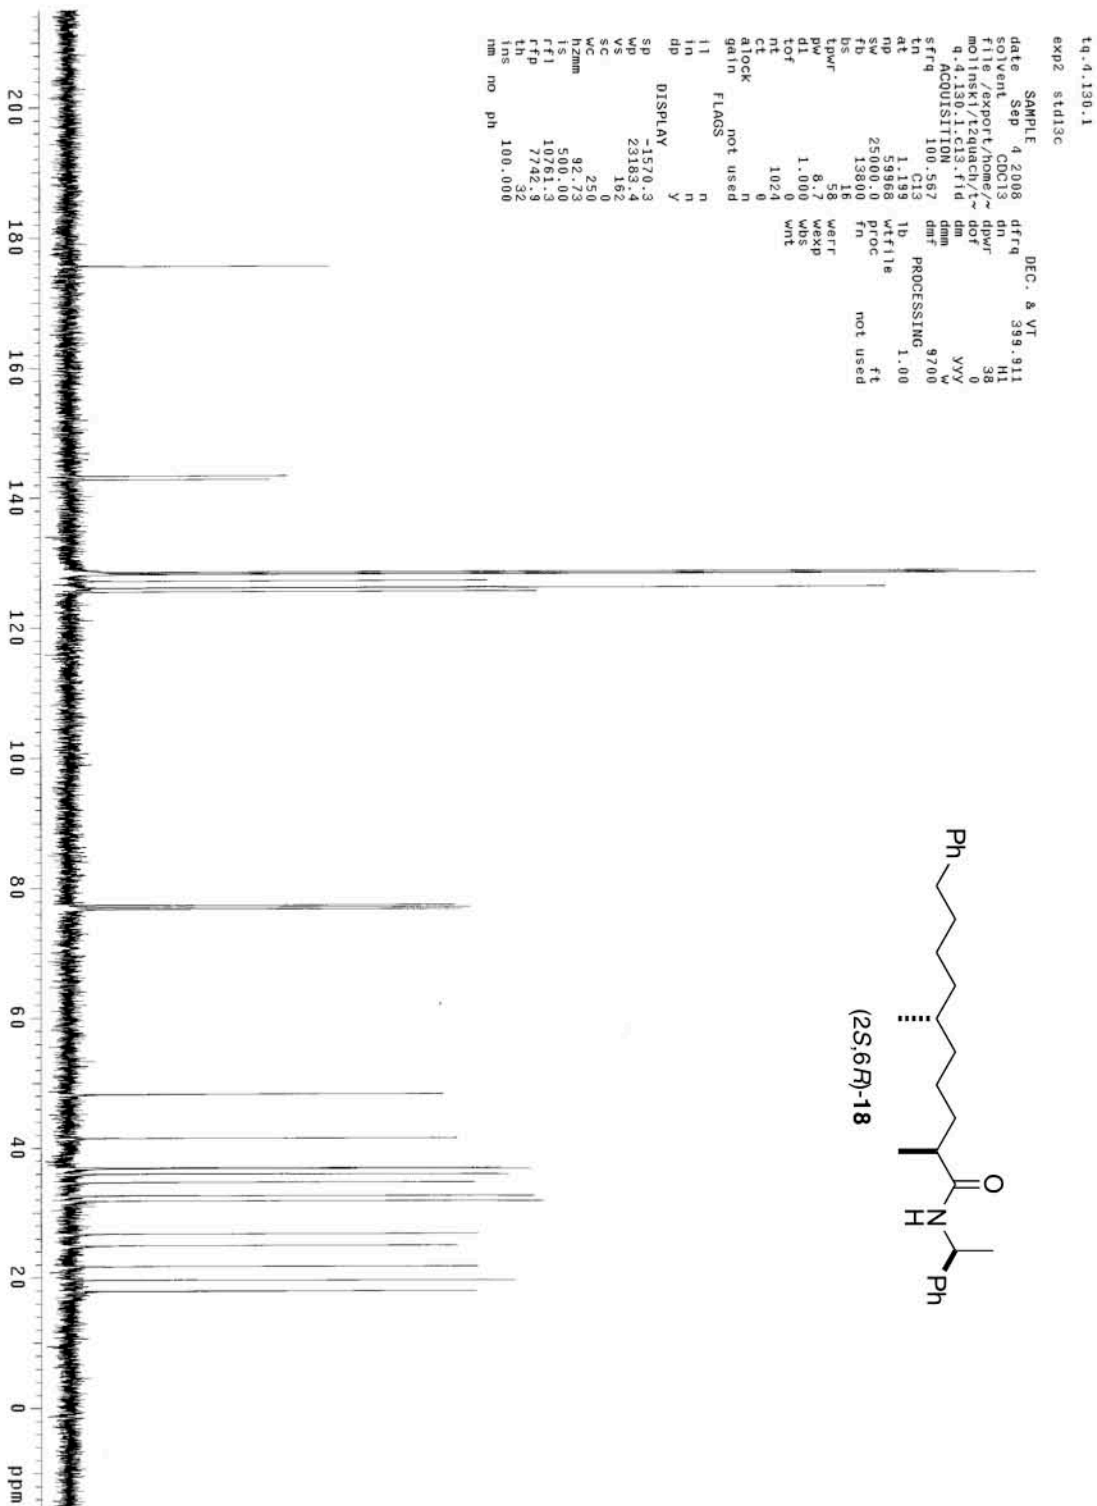



**Figure S31:**  $^{13}\text{C}$  NMR spectrum of amide (*2R,6R*)-**19** (100 MHz,  $\text{CDCl}_3$ ).

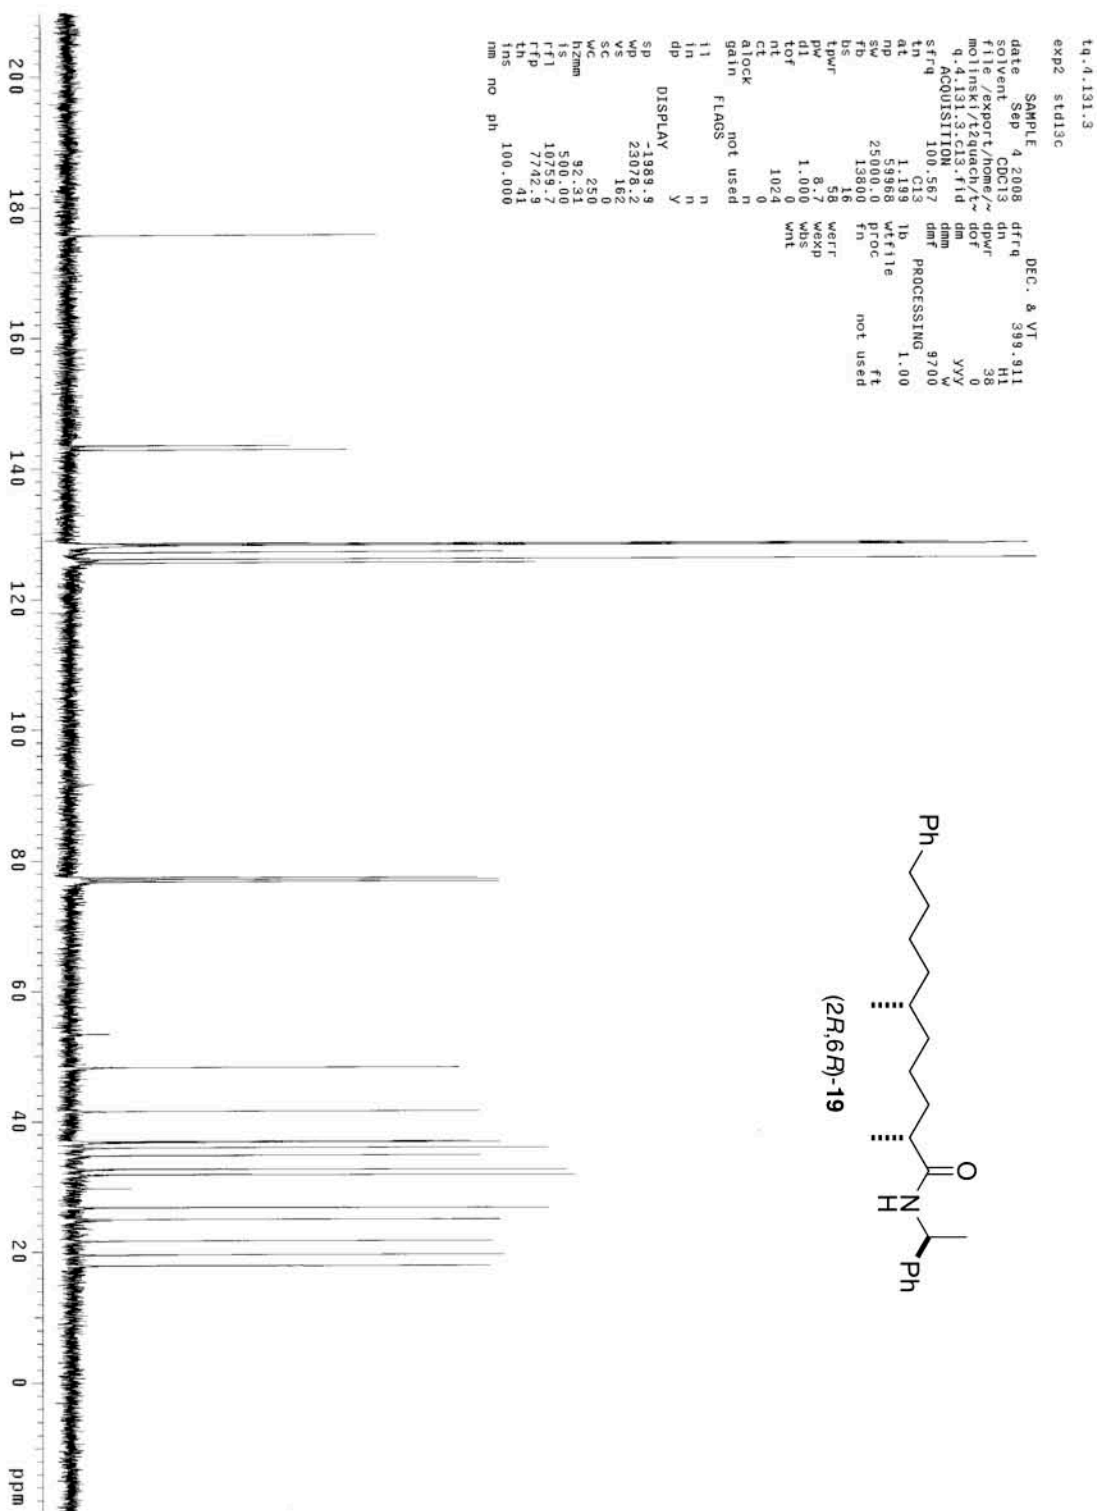

**Figure S32:**  $^1\text{H}$  NMR spectrum of secondary amine (2*S*,6*R*)-**20** (400 MHz,  $\text{CDCl}_3$ ).

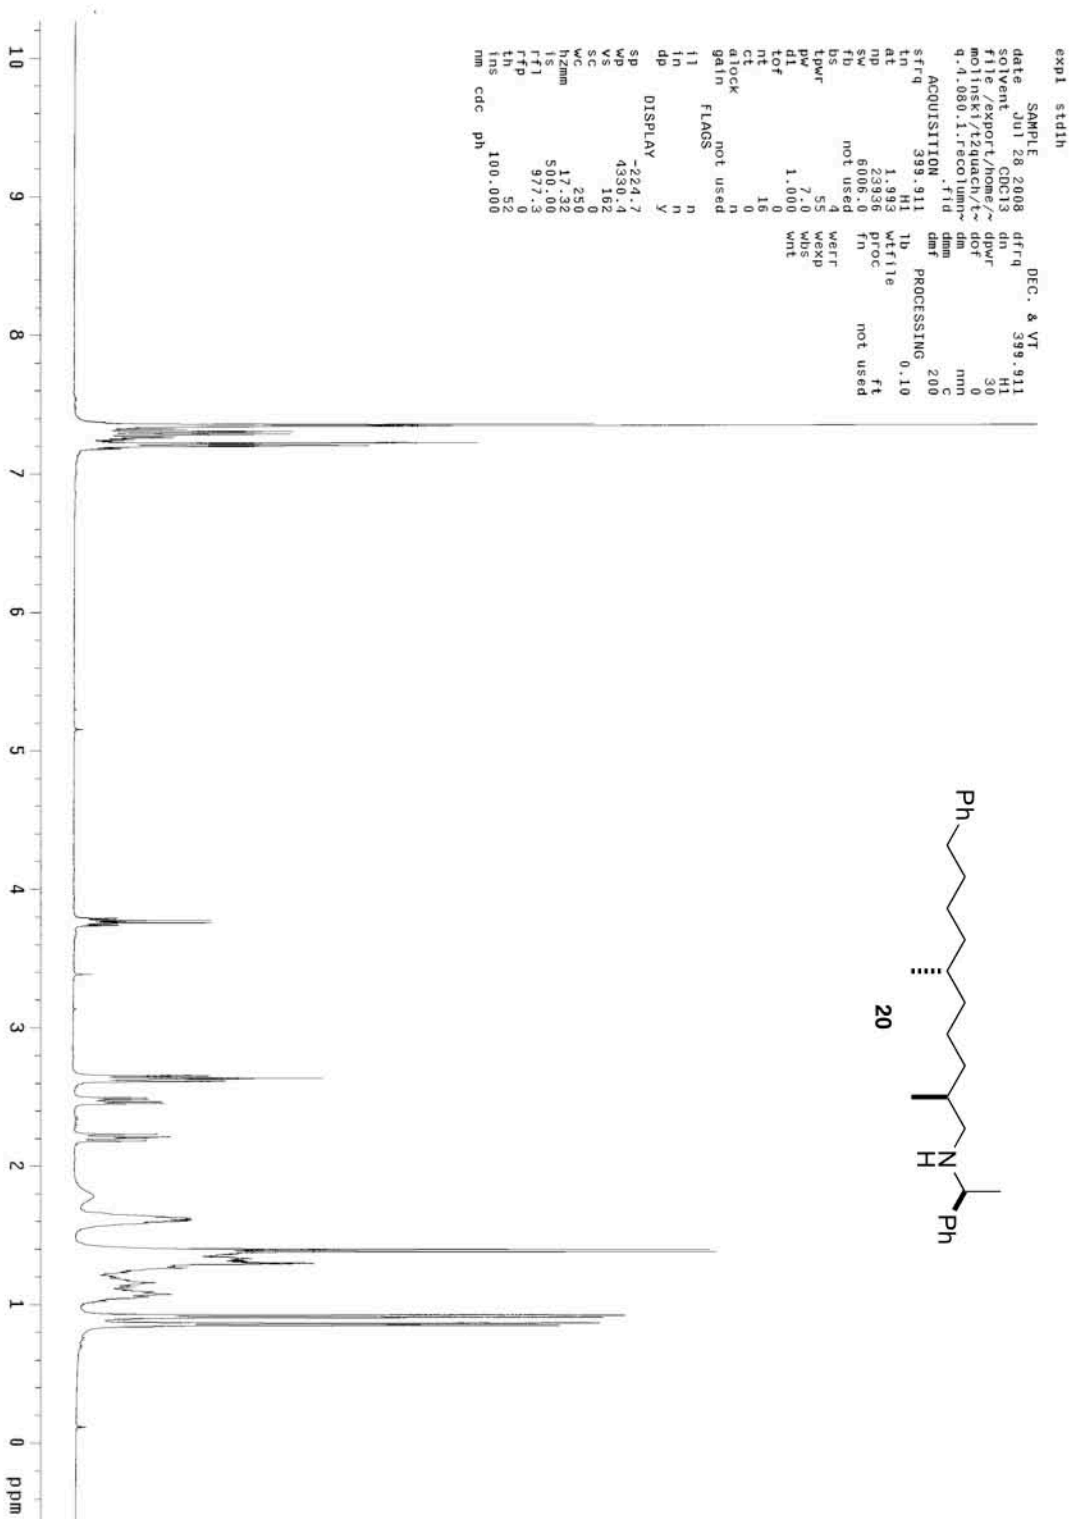

**Figure S33:**  $^{13}\text{C}$  NMR spectrum of secondary amine (2*S*,6*R*)-**20** (100 MHz,  $\text{CDCl}_3$ ).

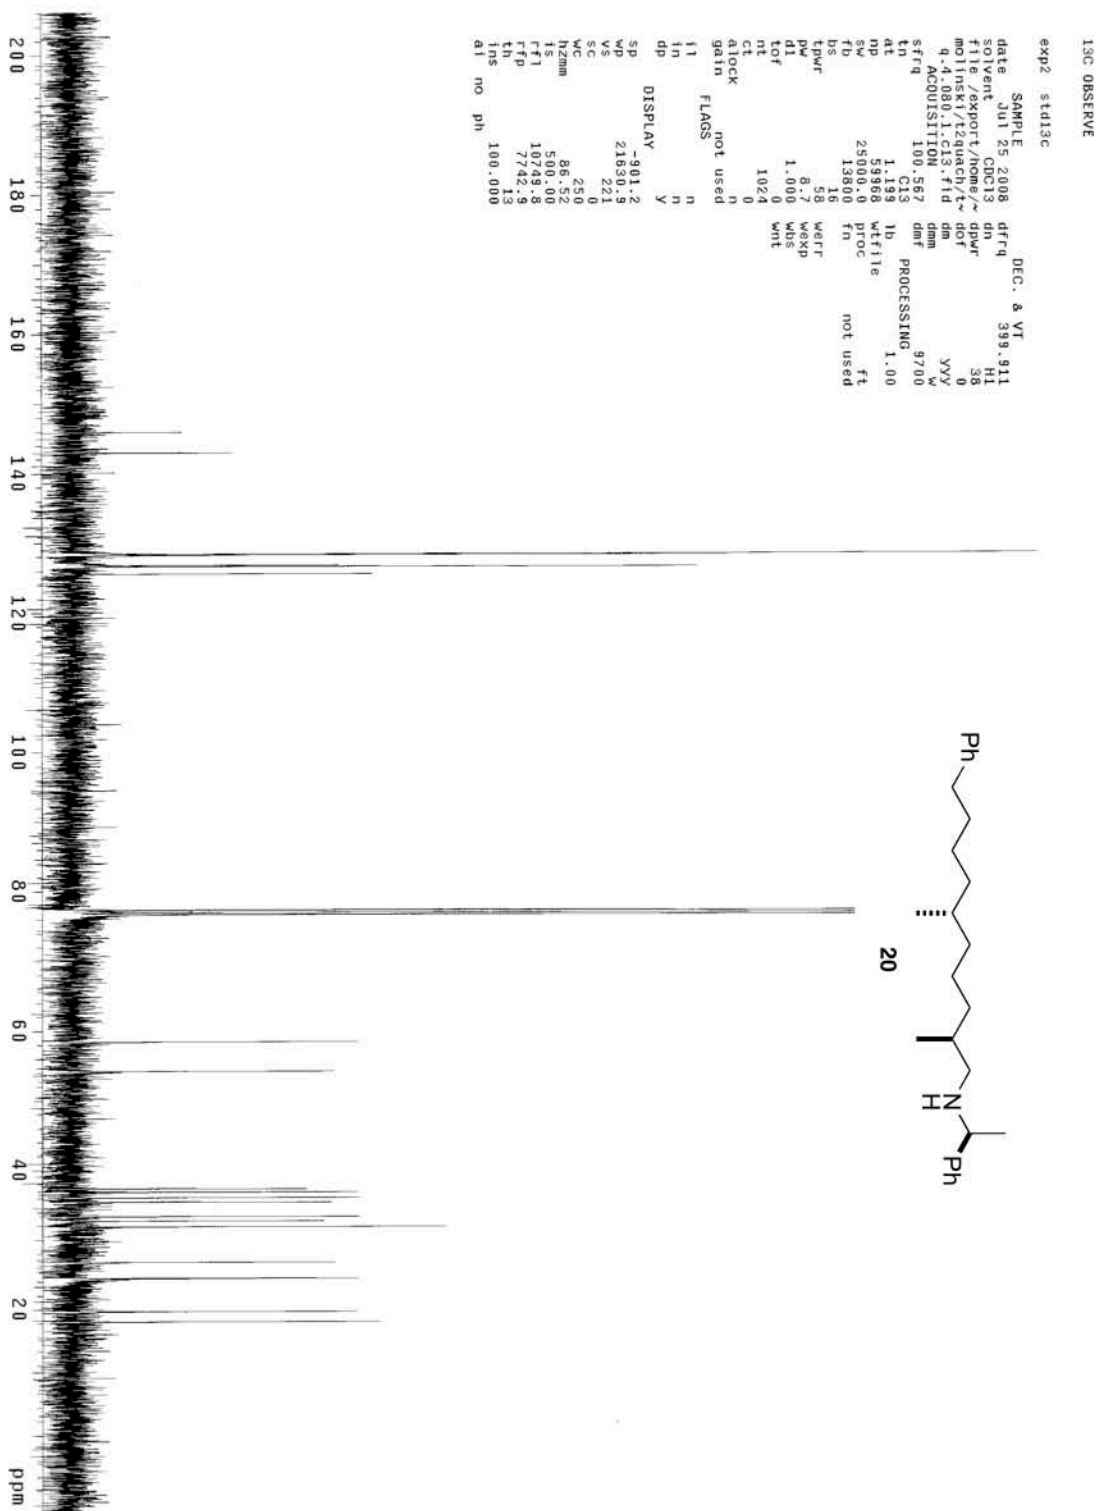

Figure S34: <sup>1</sup>H NMR spectrum of secondary amine (2*R*,6*R*)-**21** (500 MHz, CDCl<sub>3</sub>).

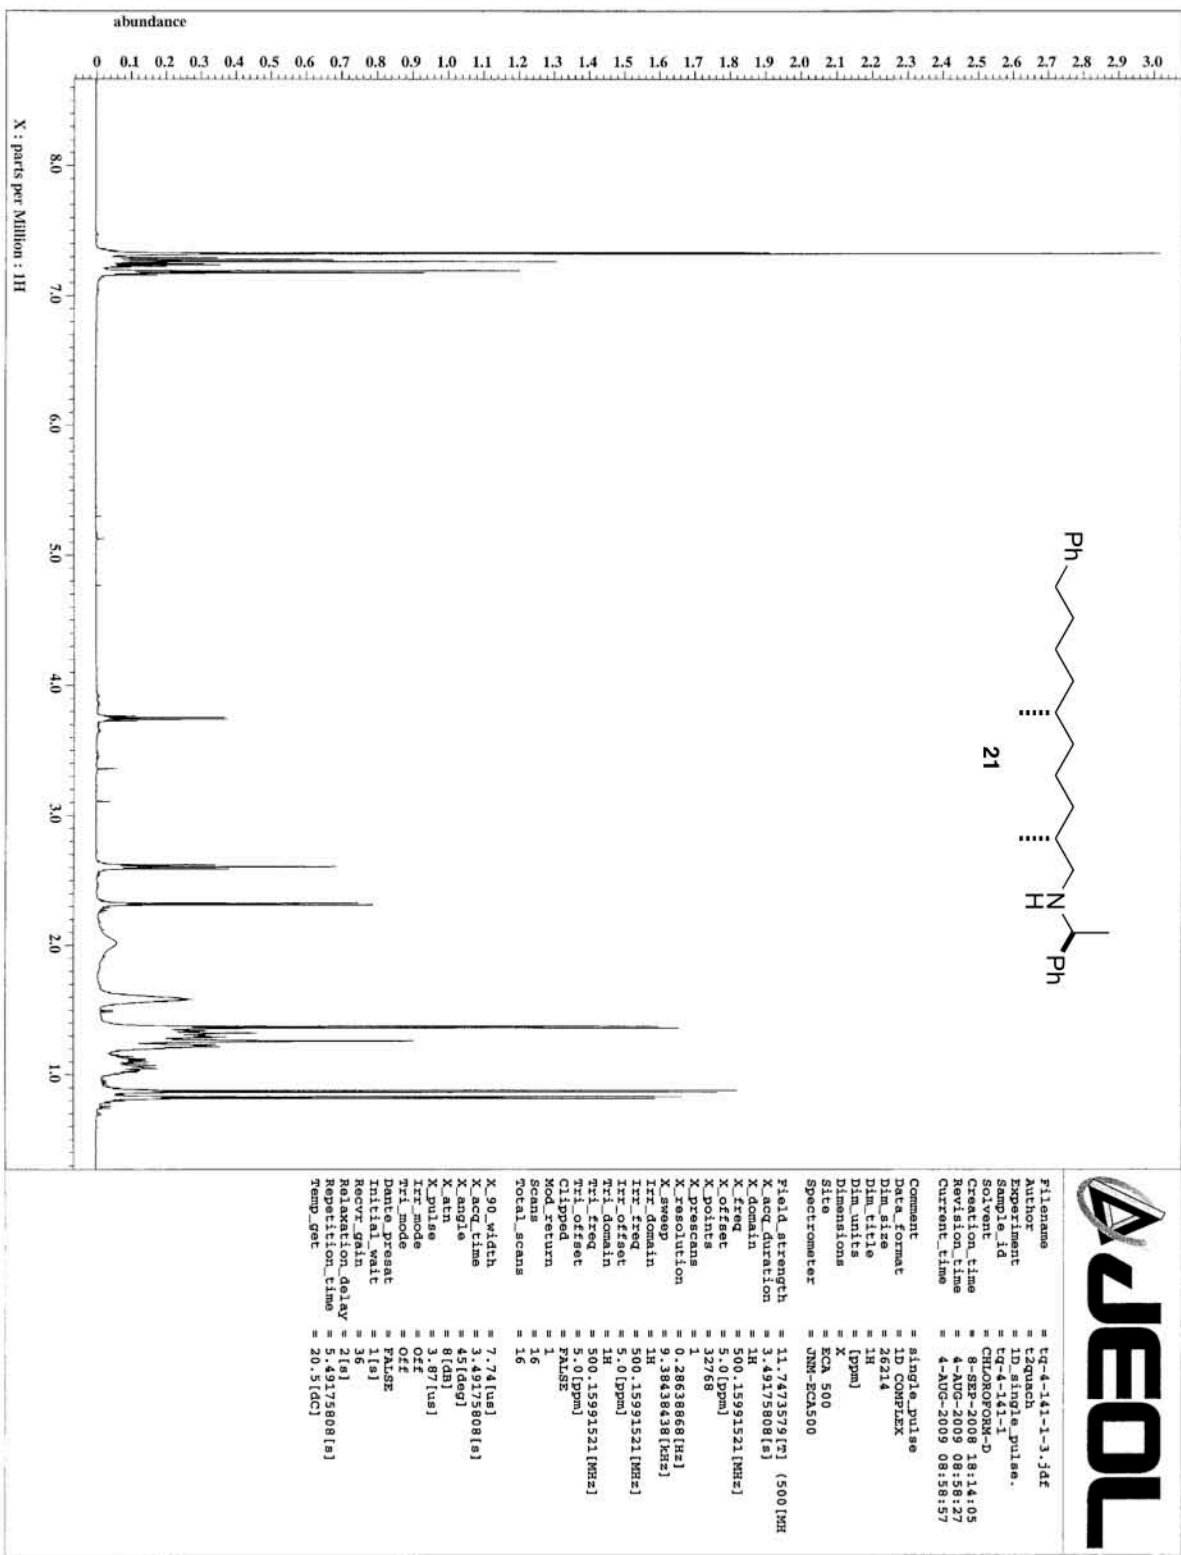



Figure S35:  $^{13}\text{C}$  NMR spectrum of secondary amine (2*R*,6*R*)-**21** (125 MHz,  $\text{CDCl}_3$ ).

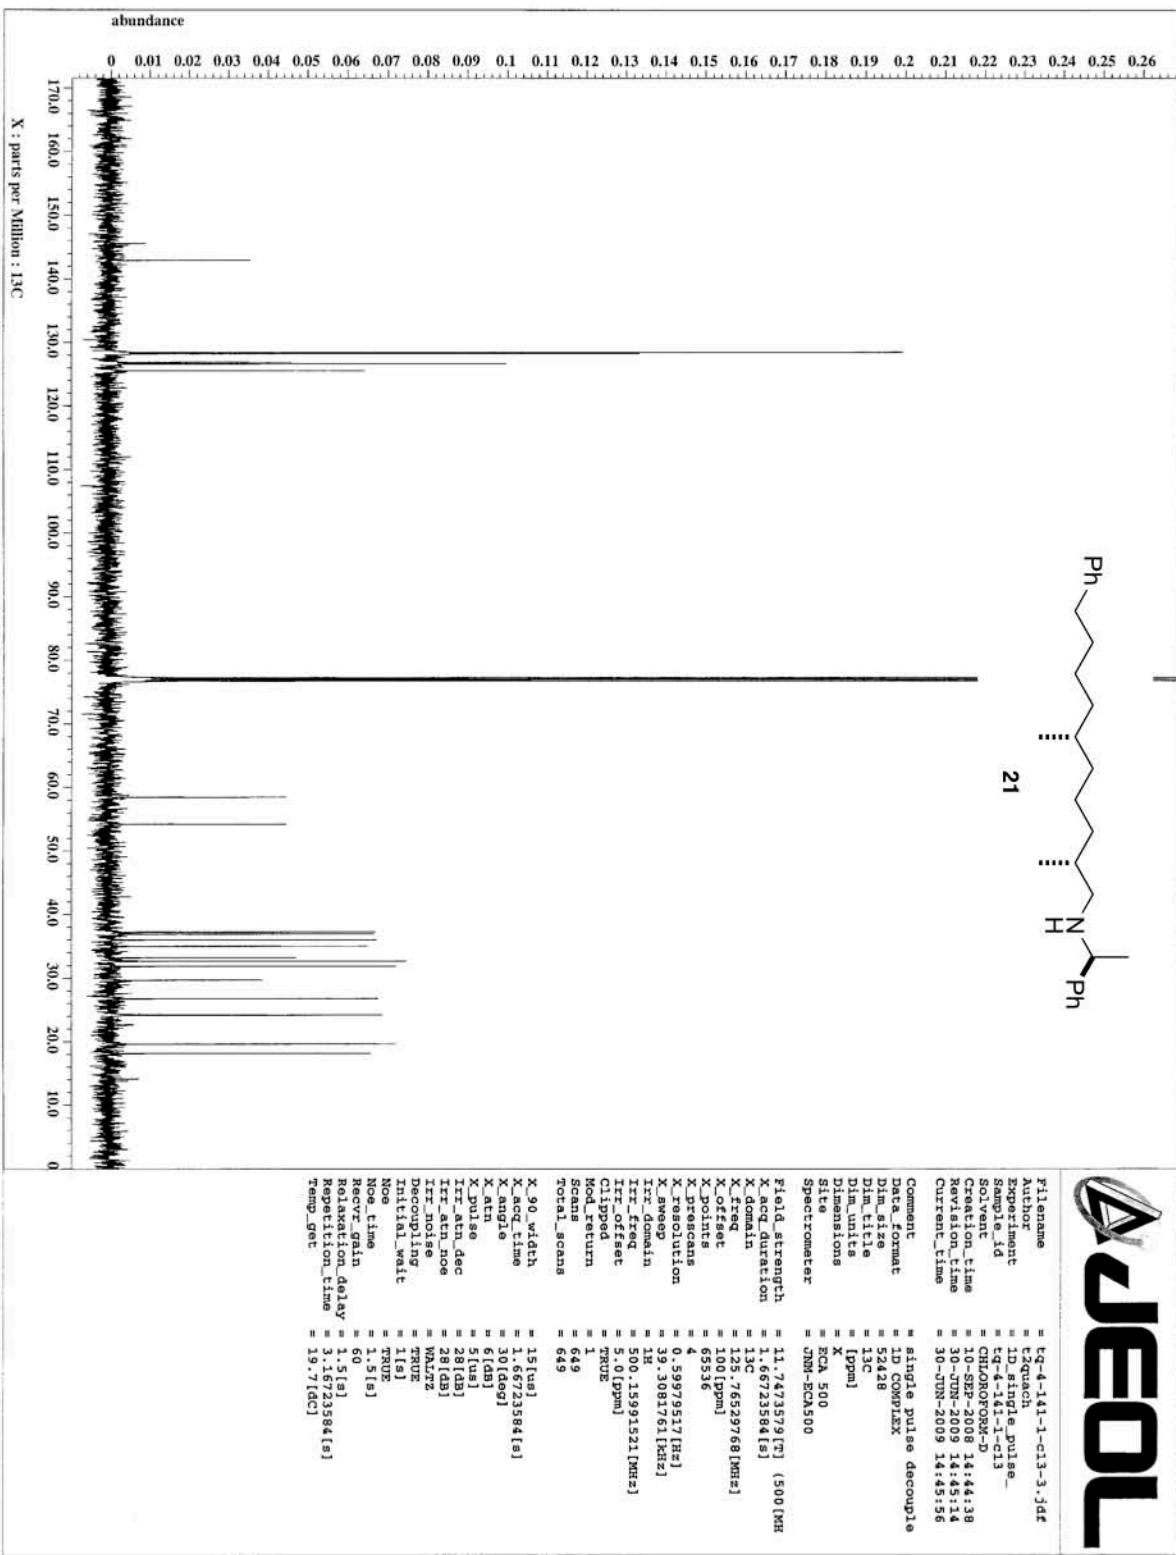

**Figure S36:**  $^1\text{H}$  NMR spectrum of primary amine (2*S*,6*R*)-**22** (400 MHz,  $\text{CDCl}_3$ ).

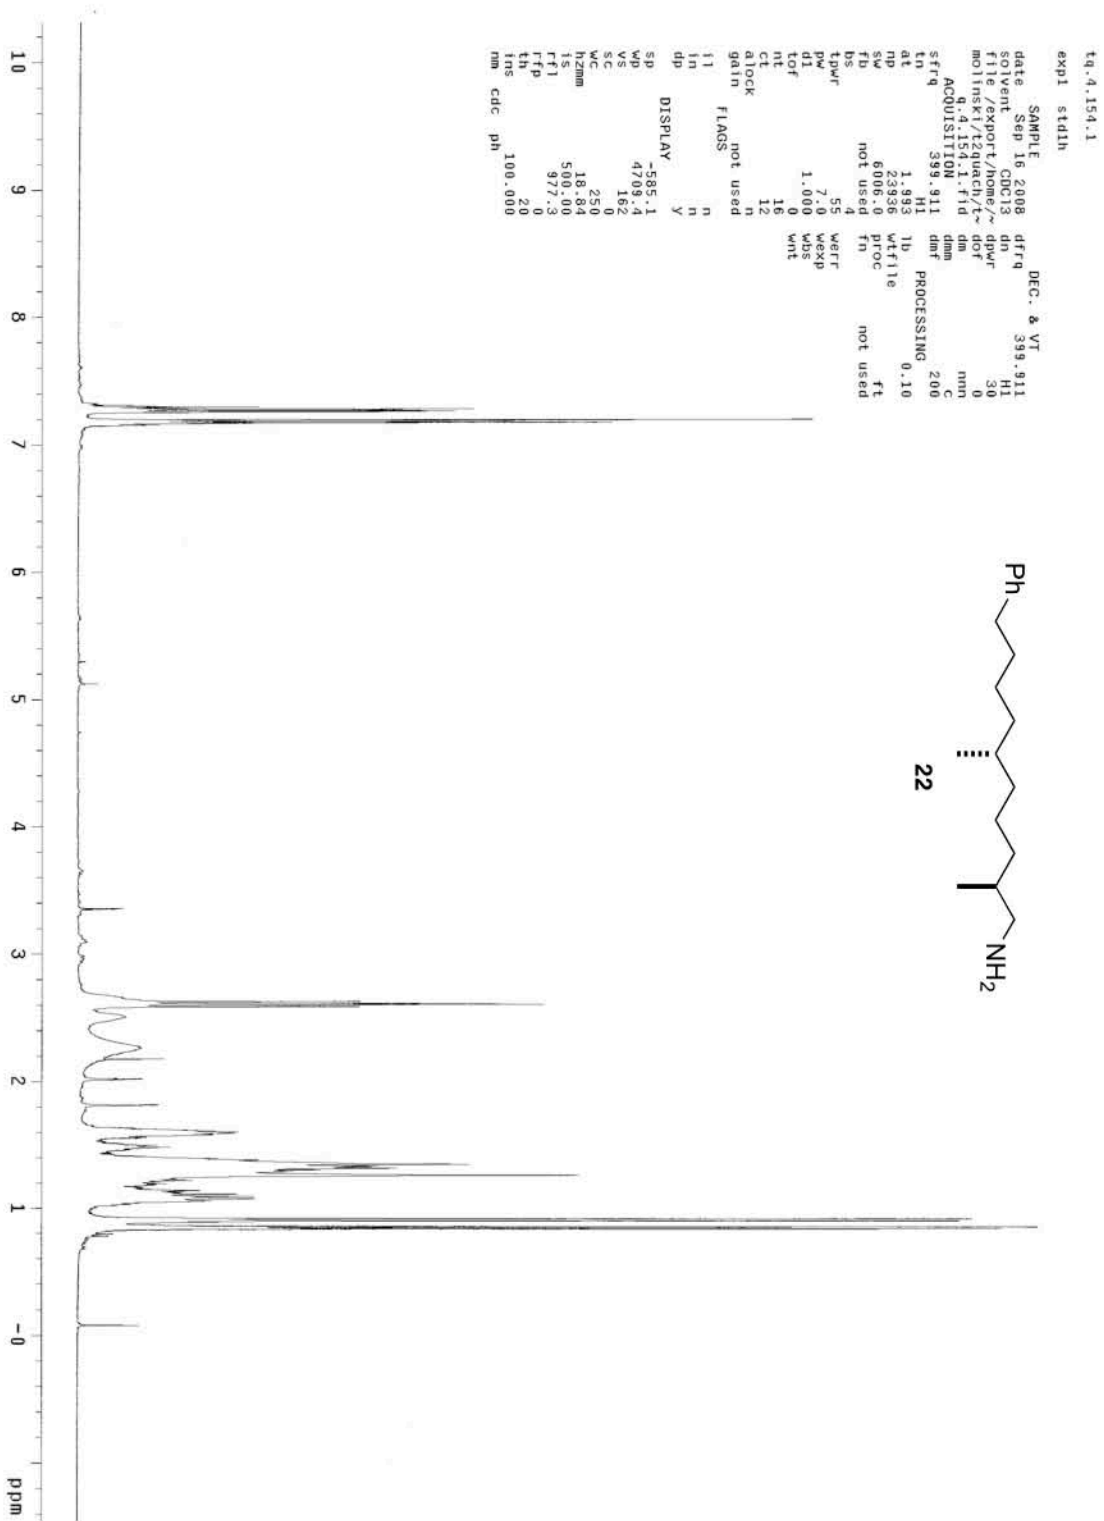

Figure S37:  $^{13}\text{C}$  NMR spectrum of primary amine (2*S*,6*R*)-**22** (125 MHz,  $\text{CDCl}_3$ ).

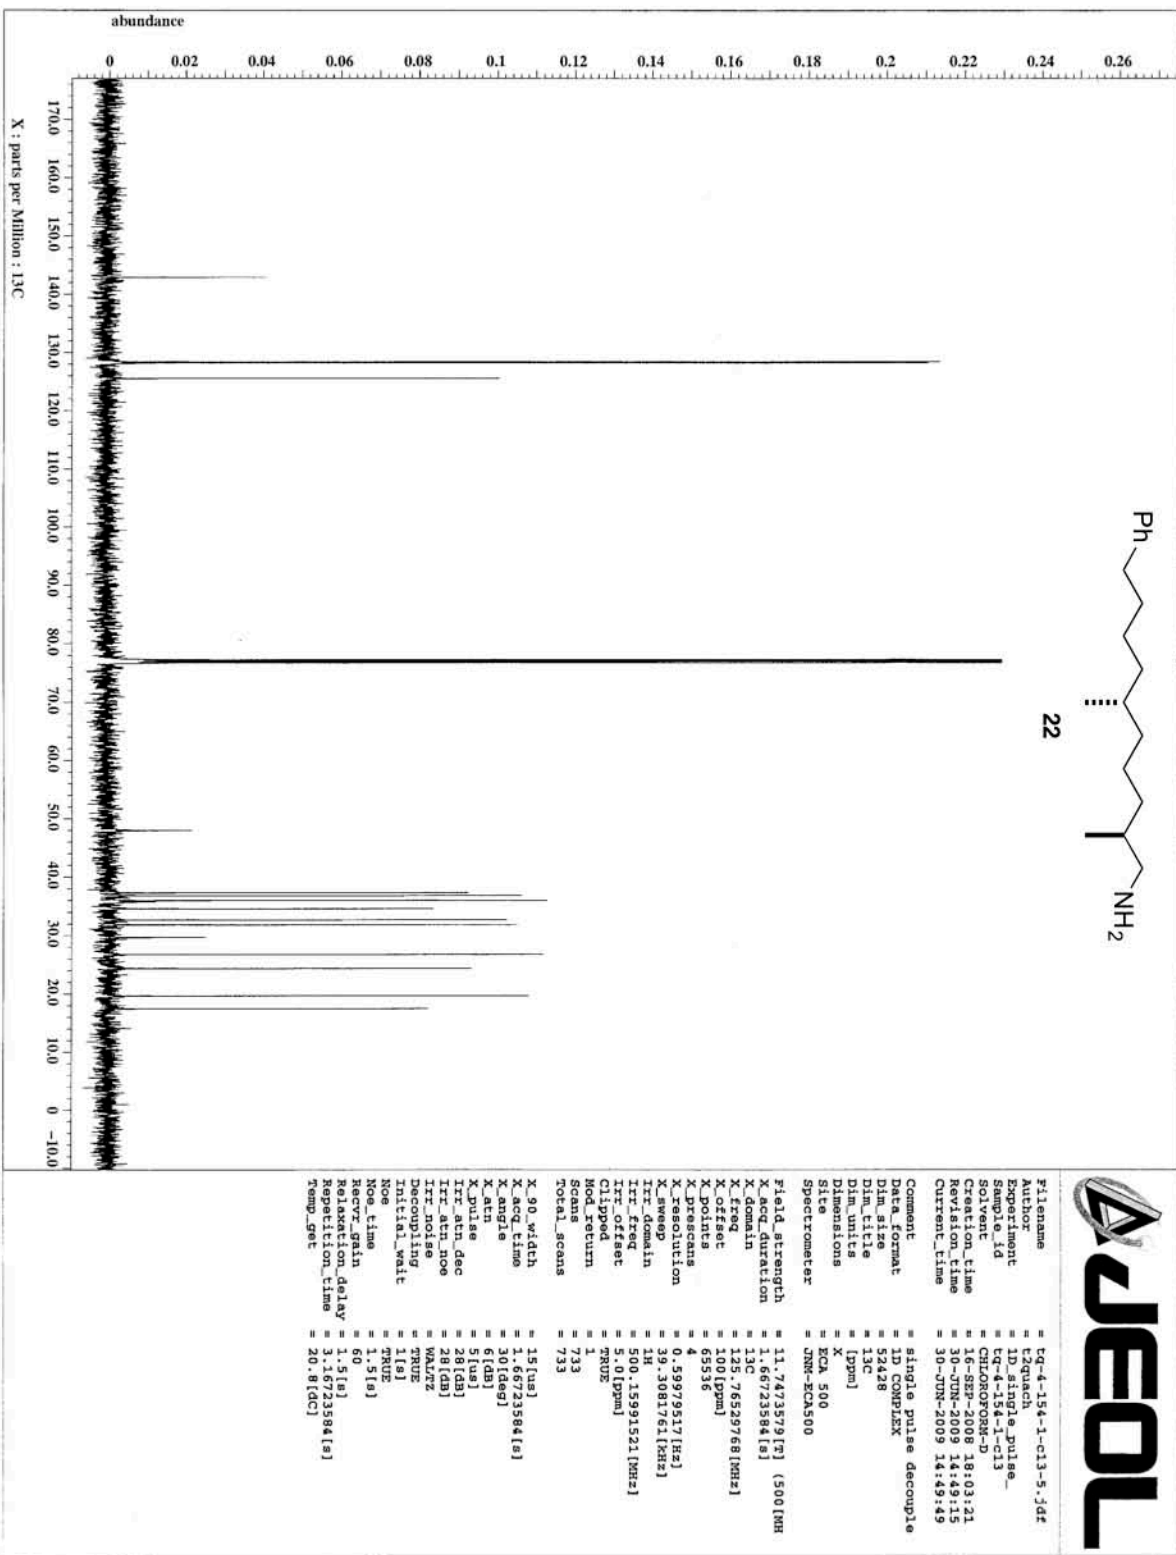

**Figure S38:**  $^1\text{H}$  NMR spectrum of primary amine (2*R*,6*R*)-**23** (400 MHz,  $\text{CDCl}_3$ ).

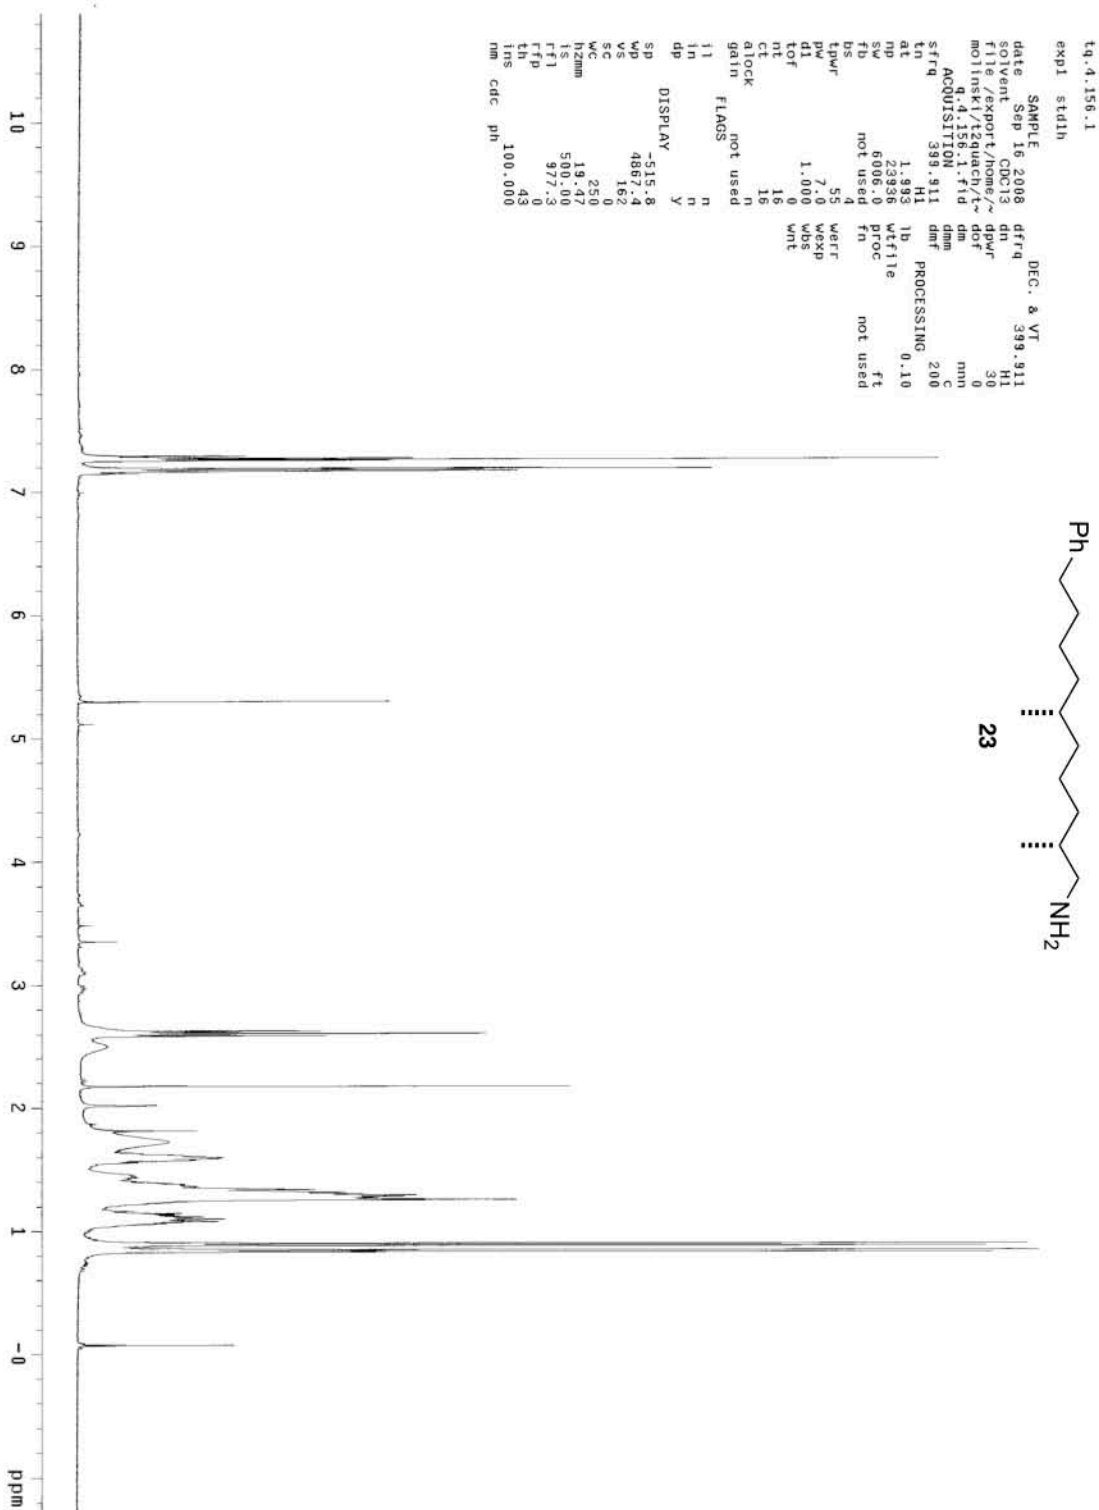

Figure S39:  $^{13}\text{C}$  NMR spectrum of primary amine (2*R*,6*R*)-**23** (125 MHz,  $\text{CD}_3\text{OD}$ ).

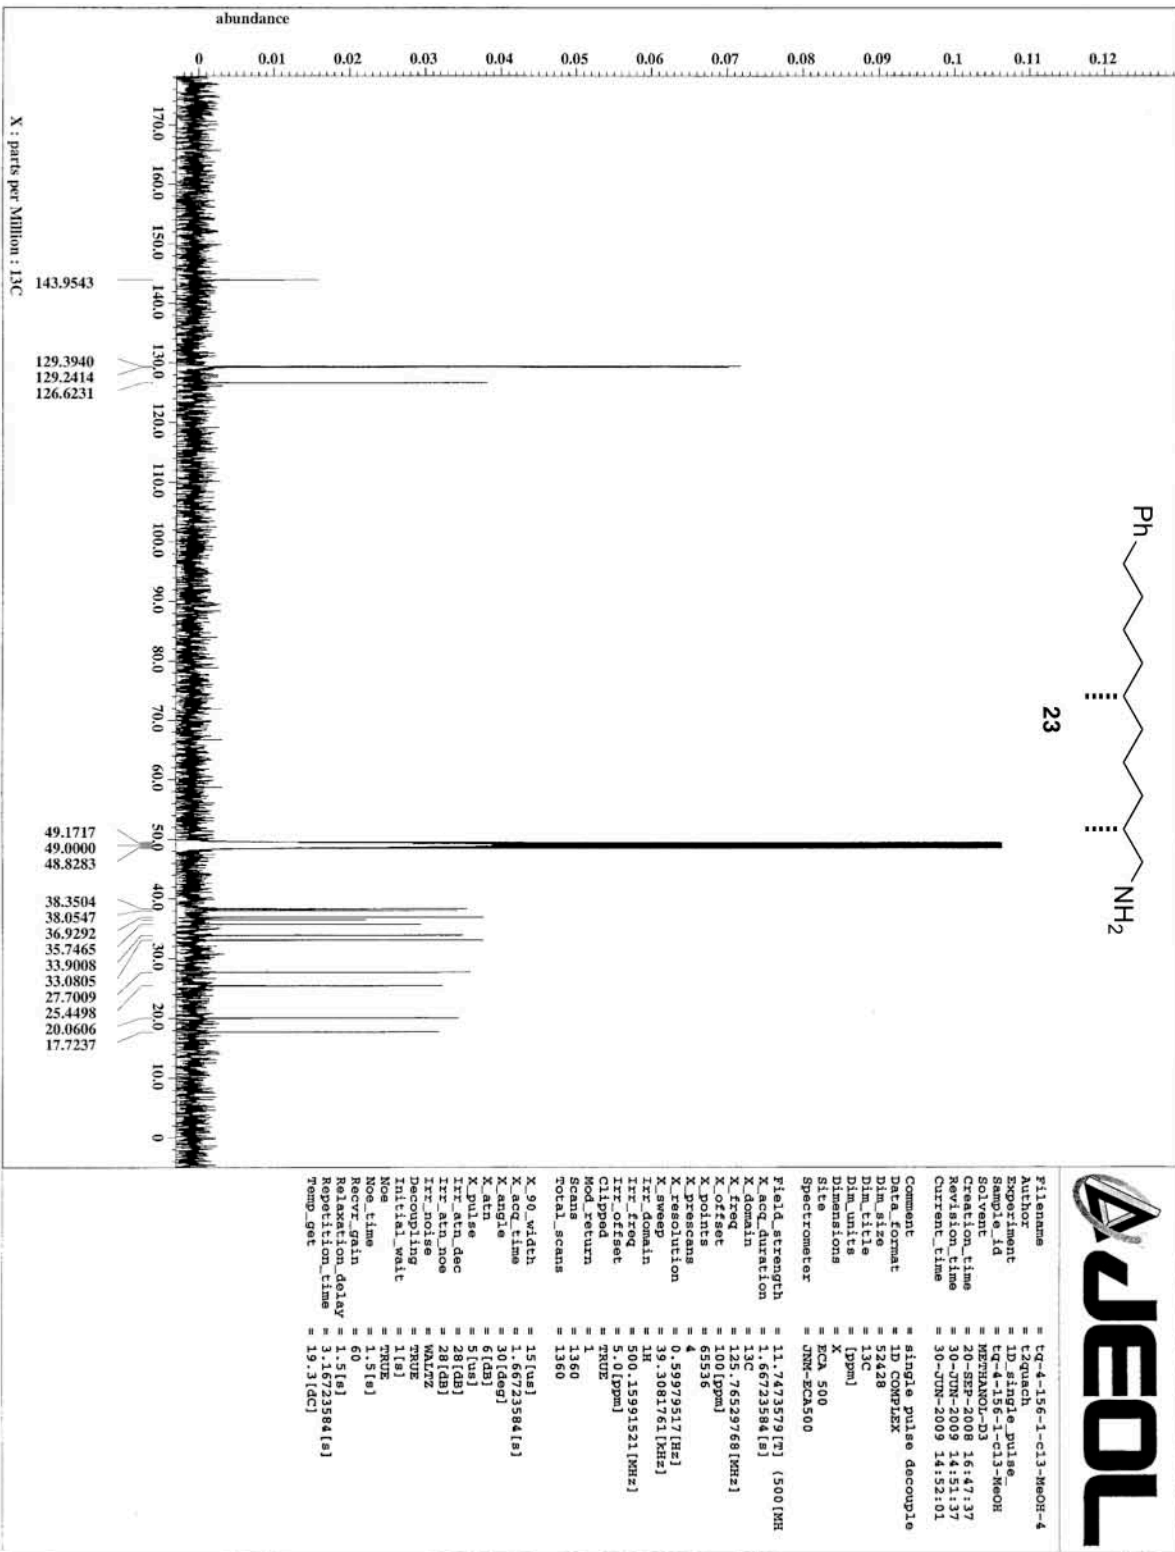

Figure S40: <sup>1</sup>H NMR spectrum of naphthamide (2*S*,6*R*)-**8** (500 MHz, CDCl<sub>3</sub>).

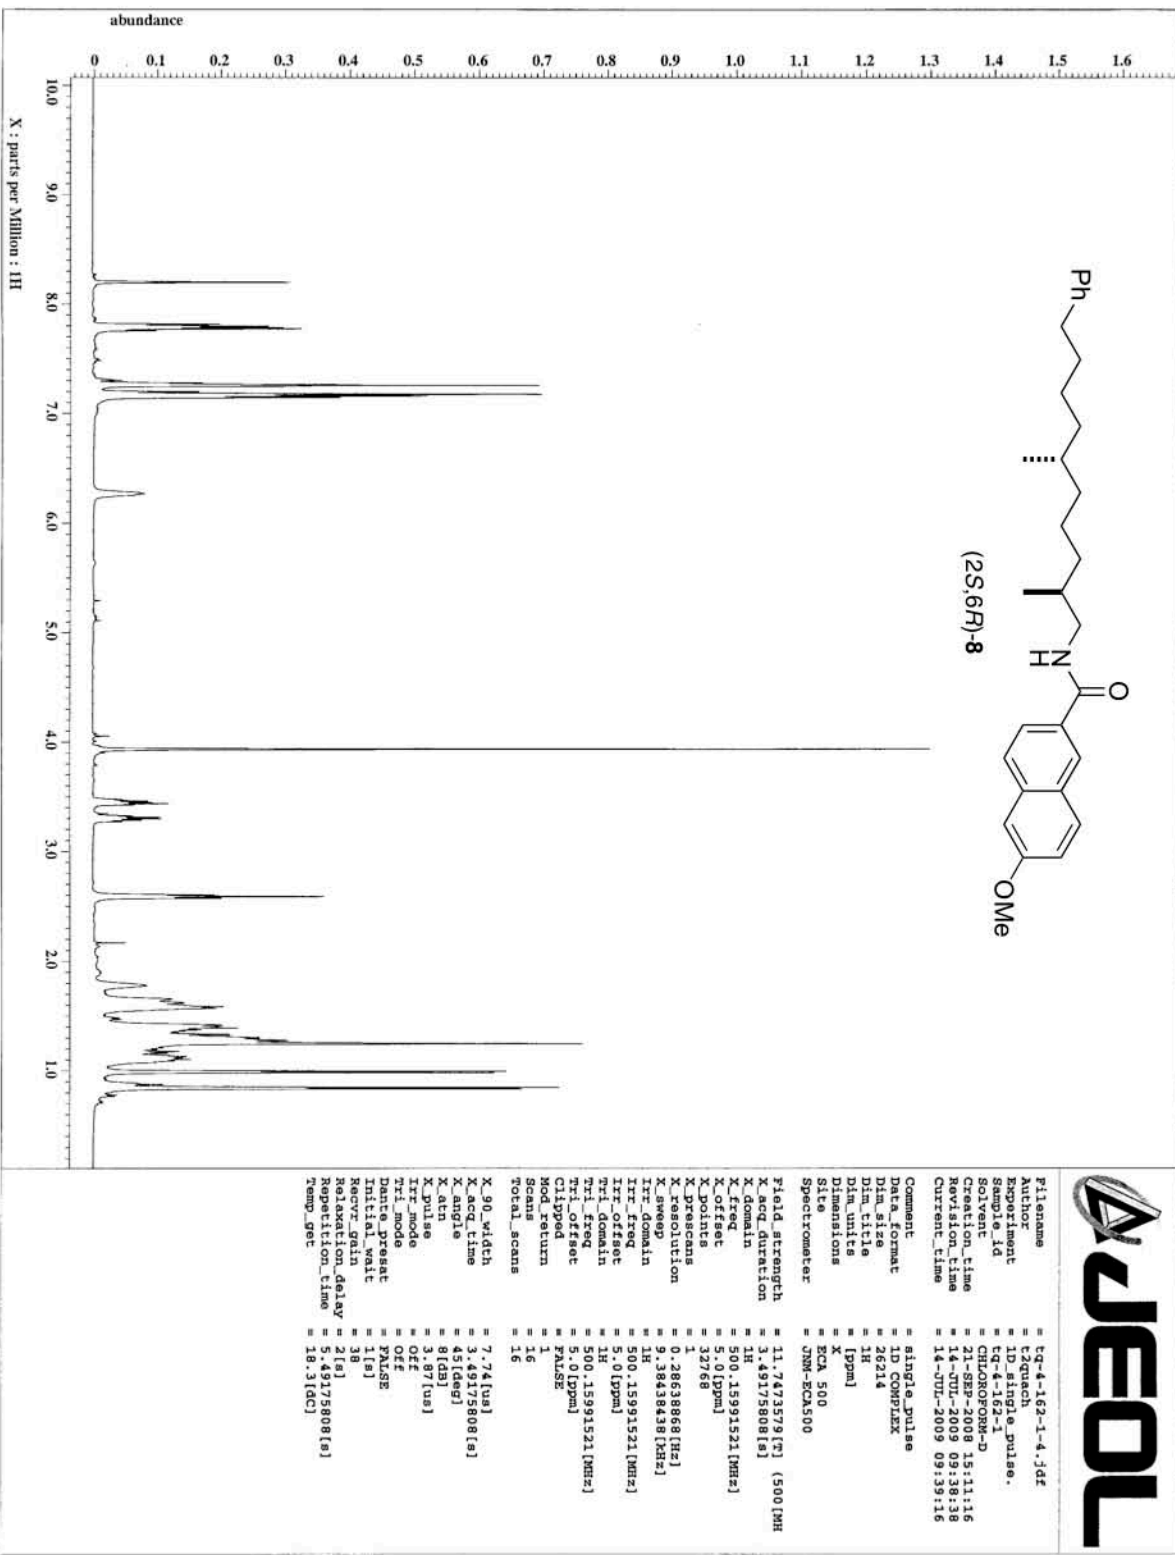

Figure S41:  $^{13}\text{C}$  NMR spectrum of naphthamide (2S,6R)-8 (125 MHz,  $\text{CDCl}_3$ ).

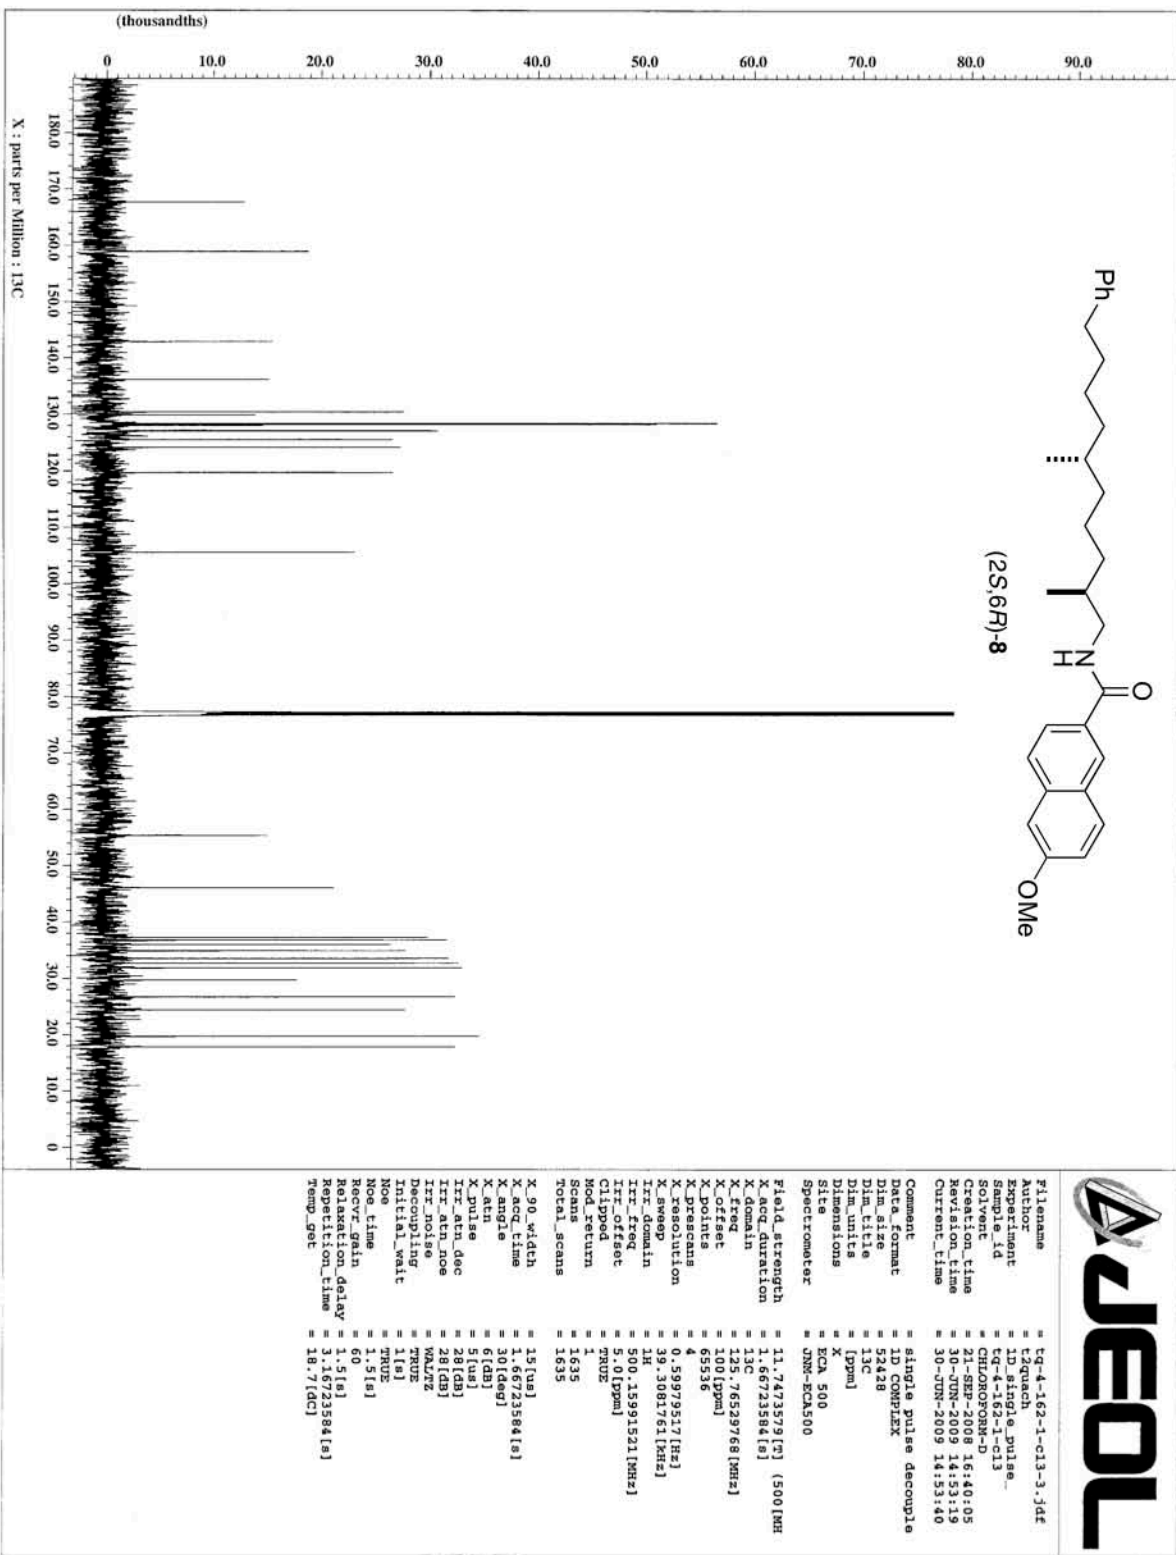

**Figure S42:**  $^1\text{H}$  NMR spectrum of naphthamide (*2R,6R*)-**9** (400 MHz,  $\text{CDCl}_3$ ).

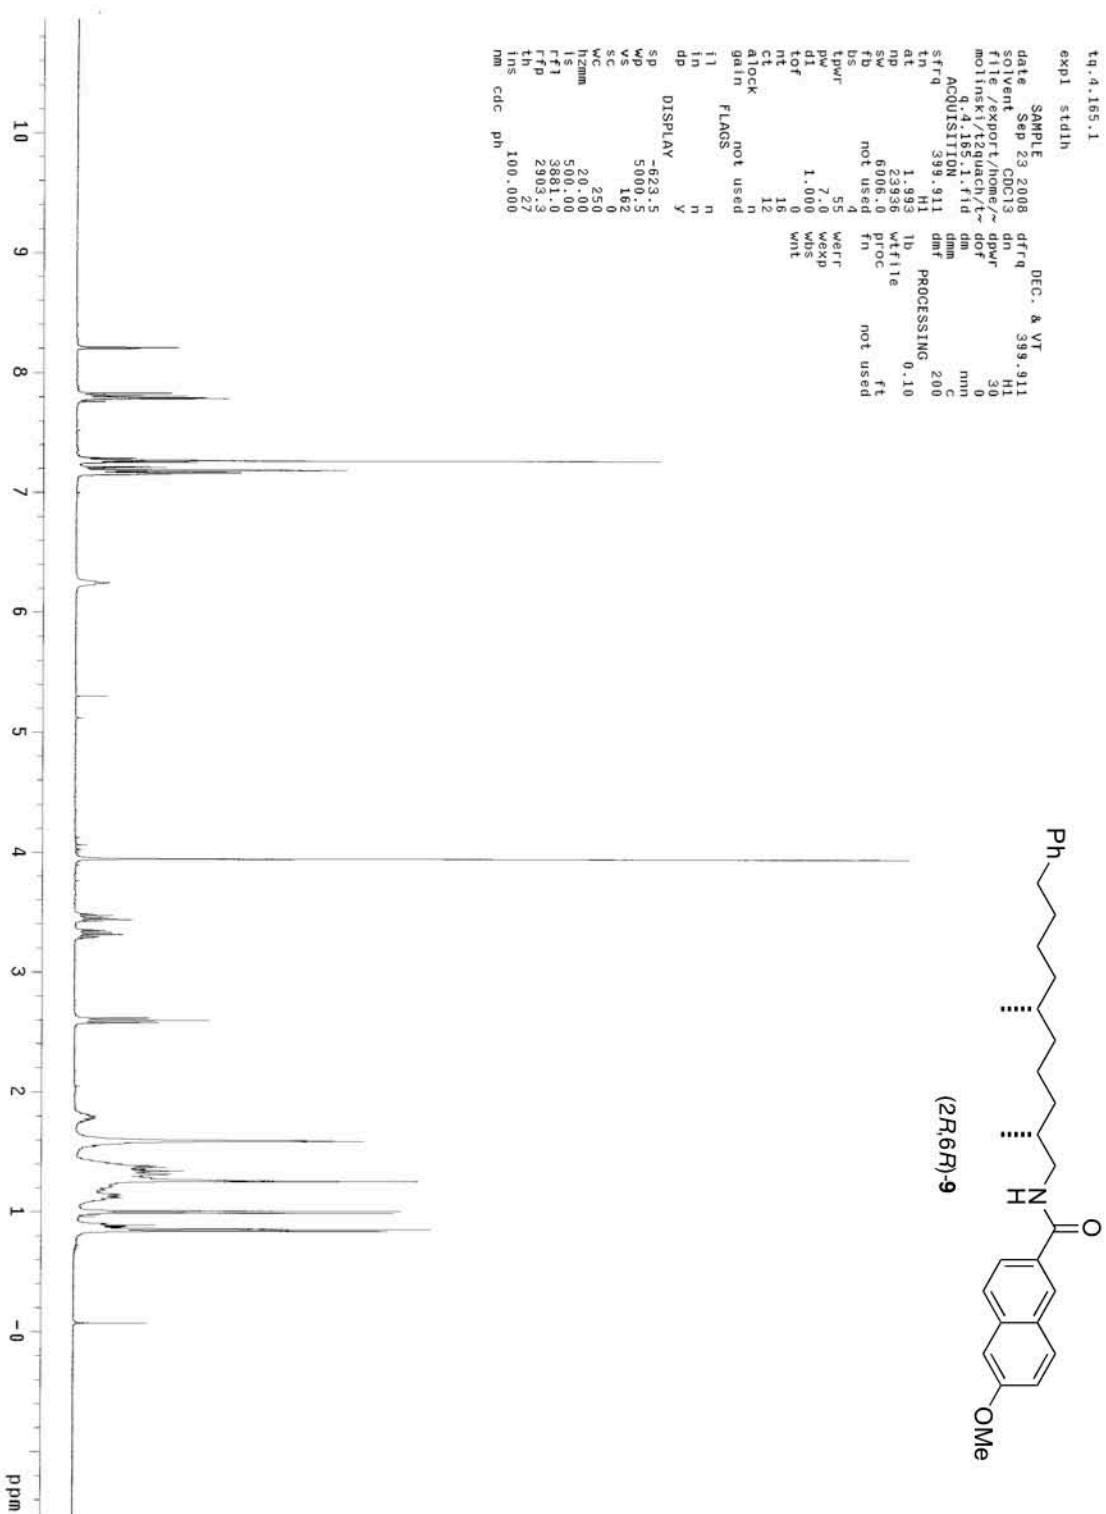



Figure S43:  $^{13}\text{C}$  NMR spectrum of naphthamide (2*R*,6*R*)-9 (125 MHz,  $\text{CDCl}_3$ ).

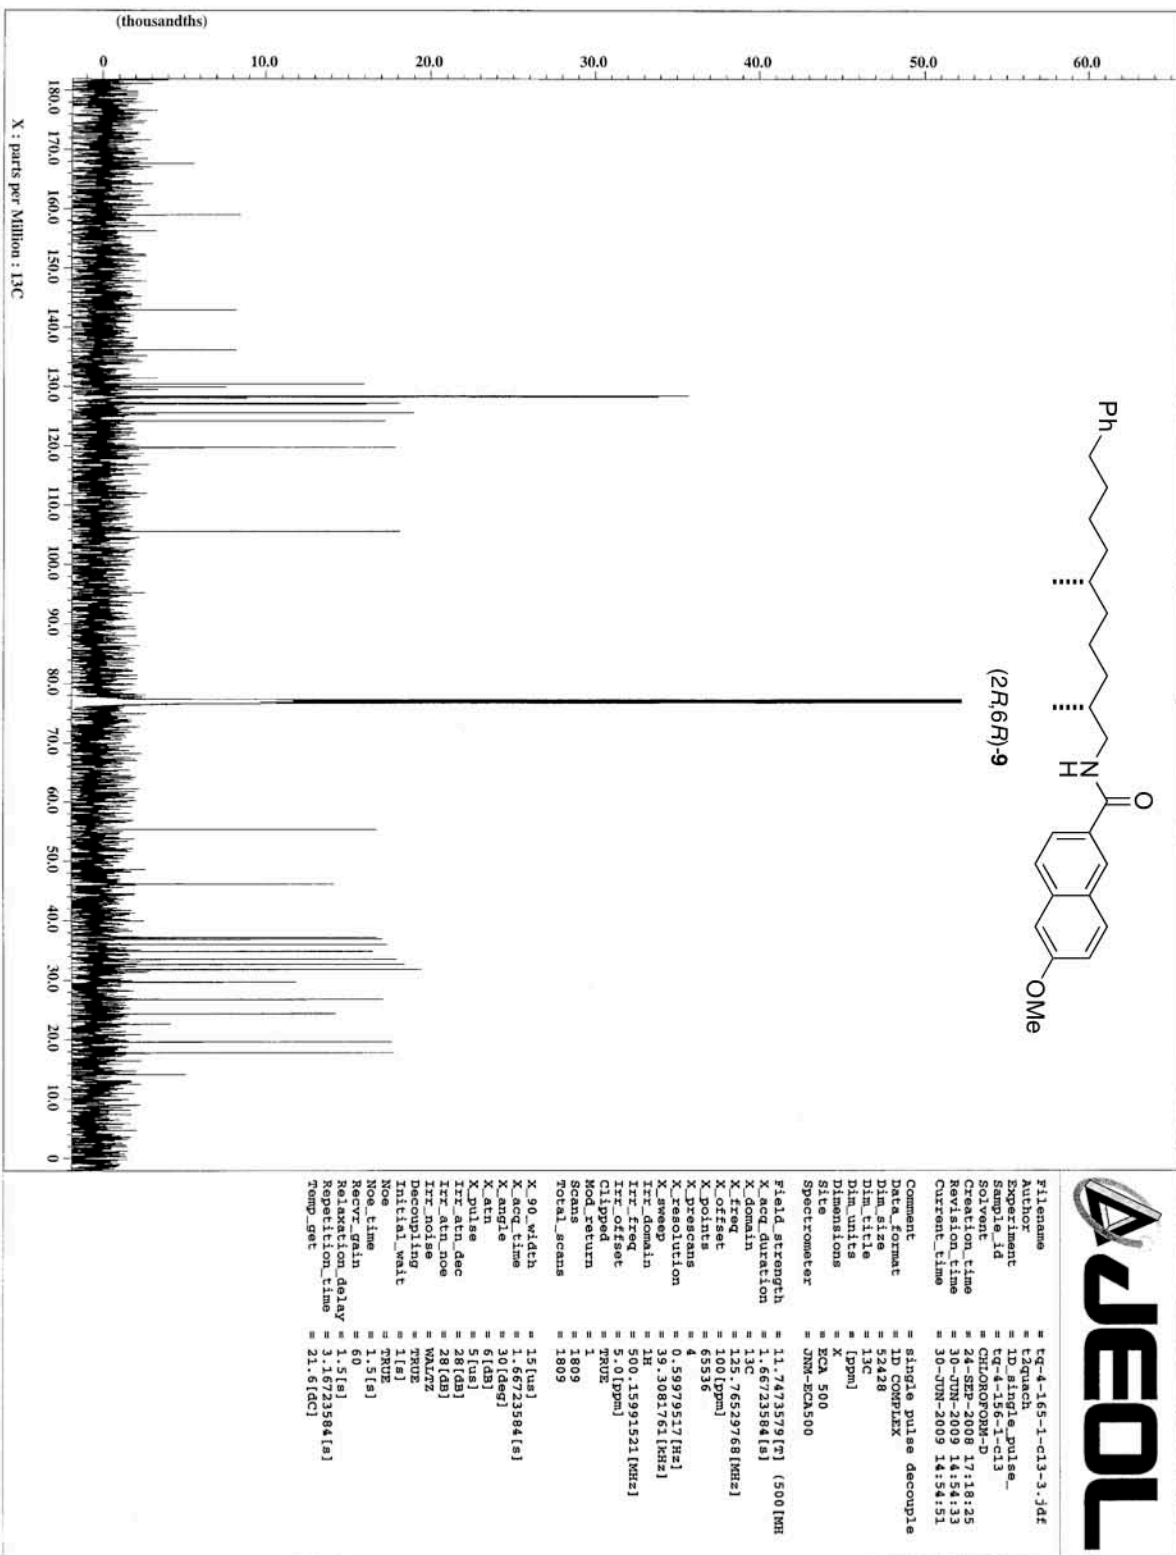

Supplement: NIHMS185724-supplement-1_si_001.pdf [file NIHMS185724-supplement-1_si_001.pdf]
